# Supplementary material for: Human macular Müller cells rely more on serine biosynthesis to combat oxidative stress than those from the periphery
Source: eLife. 2019 Apr 30;8:e43598. doi: 10.7554/eLife.43598 (PMC6533082; doi:10.7554/eLife.43598)
Supplement: Figure 1—source data 1. [file elife-43598-fig1-data1.xlsx]

## Sheet: Sheet1
Fig1 B
cytoplasma/nucleus ratio
	M-huPMCs	P-huPMCs
No.1	4.33333	8.23846
No.2	6.95238	7.88387
No.3	7.01923	9.95455
No.4	1.95	9.33766
No. 5	4.25926	14.878
No. 6	6.1	9.5
No.7	3.02857	15.2857
No.8	7.06667	9.25
average	5.08868	10.541
