# Supplementary material for: Human macular Müller cells rely more on serine biosynthesis to combat oxidative stress than those from the periphery
Source: eLife. 2019 Apr 30;8:e43598. doi: 10.7554/eLife.43598 (PMC6533082; doi:10.7554/eLife.43598)
Supplement: Figure 3—source data 1. [file elife-43598-fig3-data1.xlsx]

## Sheet: Fig3B
Fig3 B
PHGDH/β-actin
	Donor 1	Donor 2	Donor 3	Donor 4
M/P huPMCs	1.26849	1.24829	1.09176	1.42964
Fig3 D&E
-10	-6	-2	fovea	2	6	10
54	74	130	100	140	78	102	donor 1
30	49	89	100	79	61	66	donor 2
35	30	42	100	53	42	42	donor 3
69	71	72	100	60	57	65	donor 4
52	80	67	100	39	46	59	donor 5
Fig3 F
	donor 1		donor 2		donor 3		donor 4		donor 5
	phgdh/tubulin		phgdh/tubulin		phgdh/tubulin		phgdh/tubulin		phgdh/tubulin
-10	0.0548902		1.10213		1.21351		1.9947		1.07668
-6	0.0763816		1.02994		1.02519		2.05414		1.65107
-2	0.137147		1.32864		1.43699		2.0888		1.36819
fovea	0.101116		1.67502		3.43733		2.90708		2.05321
2	0.149577		1.49205		1.83507		1.73983		0.805167
6	0.0850585		0.81417		1.44786		1.65439		0.947107
10	0.090755		0.49458		1.44856		1.88475		1.21962
