# Supplementary material for: Human macular Müller cells rely more on serine biosynthesis to combat oxidative stress than those from the periphery
Source: eLife. 2019 Apr 30;8:e43598. doi: 10.7554/eLife.43598 (PMC6533082; doi:10.7554/eLife.43598)
Supplement: Figure 5—source data 1. [file elife-43598-fig5-data1.xlsx]

## Sheet: Fig5C
Fig5 C
	M-huPMCs					P-huPMCs
M0 Serine	67.268	85.716	77.706	84.8032		90.41	84.154	87.356	89.6433
M1 Serine	3.102	0.683	1.802	2.06811		2.161	1.239	1.65	2.57632
M2 Serine	1.457	0.44	0.814	0.167529		0.893	0.547	0.711	0.325253
M3 Serine	28.173	13.161	19.678	12.9612		6.536	14.06	10.284	7.45512
M0 Glycine	84.116	93.946	86.733	84.8821		94.803	91.978	98.275	98.9406
M1 Glycine	0.401	0.211	0.405	1.08464		0.412	0.185	0.339	0.114275
M2 Glycine	15.483	5.843	12.862	14.0333		4.786	7.838	1.385	0.945086
Fig5 D
	M-huPMCs				P-huPMCs
M0 Serine	2.03	1.96	1.92		1.09	1.05	1.09
M1 Serine	0.29	0.18	0.26		1.02	1.04	1.01
M2 Serine	0	0	0		0.2	0.18	0.22
M3 Serine	97.69	97.87	97.82		97.69	97.73	97.68
M0 Glycine	27.21	24.88	28.81		26.35	25.98	25.57
M1 Glycine	3.34	3.79	3.08		14.7	14.58	14.95
M2 Glycine	69.44	71.33	68.11		58.95	59.44	59.48
Fig5 F
	M-hPMCs						P-hPMCs
Glycolytic Capacity	31.591	38.028	40.894	32.975	29.315		20.148	20.752	24.398	23.942	25.741
Glycolytic Reserve	6.234	7.508	9.42	7.382	4.813		1.742	0.314	4.792	3.992	6.347
Glycolysis	25.357	30.52	31.474	25.593	24.502		18.406	20.438	19.606	19.95	19.393
Fig5 H
	M-hPMCs					P-hPMCs
Basal Respiration	13.1884	11.5428	6.8577	8.95172		2.54111	5.6688	-0.56522	8.22349
ATP Production	14.6026	12.1219	8.59472	11.0877		4.45393	9.25466	6.06824	9.56579
Maximal Respiration	36.0744	36.5305	28.407	31.201		38.2965	30.8393	25.2323	31.1815
Spare Respiratory Capacity	22.886	24.9877	21.5493	22.2493		35.7554	25.1705	25.7975	22.958
