# Supplementary material for: Human macular Müller cells rely more on serine biosynthesis to combat oxidative stress than those from the periphery
Source: eLife. 2019 Apr 30;8:e43598. doi: 10.7554/eLife.43598 (PMC6533082; doi:10.7554/eLife.43598)
Supplement: Figure 6—source data 1. [file elife-43598-fig6-data1.xlsx]

## Sheet: Fig6 A
Fig6 A
C13 labelled serine	C13 labelled glycine
55.9646	20.1231
83.6727	61.7472
75.1864	63.246
47.1717	29.378
50.3124	67.5174
79.326	40.6673
Fig6 B
	M-huPMCs							P-huPMCs
Control	120.966	103.361	102.42	102.091	93.2135	77.9497		109.112	103.011	106.034	101.835	97.6252	82.3832
CBR	95.3668	92.6255	93.9347	95.5497	94.0602	89.3198		98.6102	95.5321	105.705	92.7087	99.4764	83.7121
H2O2	84.5141	78.0829	88.7266	84.4069	78.8382	73.4549		78.2126	95.247	93.0505	93.1652	91.369	89.658
H2O2+CBR	74.5943	64.6327	68.5212	71.1867	79.3373	61.4237		86.387	98.524	97.0669	93.3965	89.652	90.5307
Fig6 C
	M-huPMCs						P-huPMCs
Control	115.504	78.5566	97.9512	93.9227	114.065		95.596	94.3992	115.989	84.203	109.813
CBR	102.785	103.016	85.4627	93.5198	87.9949		104.213	95.8353	107.372	83.3413	87.889
H2O2	106.929	130.467	116.77	116.022	109.059		88.1762	92.0058	98.3724	94.1599	112.494
H2O2+CBR	130.582	164.768	158.325	141.977	152.739		98.899	110.545	115.462	89.9474	129.871
Fig6 F
	Control						H2O2 100µM						H2O2 100µM+CBR 30µM
M-huPMCs	164.781	161.876	151.004	153.229	119.569		173.794	168.969	167.496	160.949	151.373		122.941	120.182	114.265	113.763	109.336
P-huPMCs	104.766	107.041	99.2136	97.7322	91.248		82.4584	80.3464	78.4169	72.7276	67.6694		76.4668	74.8376	75.6485	69.395	63.8505
Fig6 I
	Control						H2O2 100µM						H2O2 100µM+CBR 30µM
P-huPMCs	105.136	93.9751	104.468	92.9535	103.467		127.999	132.171	134.34	110.309	135.175		155.034	168.217	150.027	177.985	151.362
M-huPMCs	130.335	124.494	116.317	118.653	131.336		135.508	133.005	115.316	120.155	116.317		182.069	178.064	163.211	196.254	159.59
