# Supplementary material for: Human macular Müller cells rely more on serine biosynthesis to combat oxidative stress than those from the periphery
Source: eLife journal article supplement (doi:10.7554/elife.43598), 2019-04-29
Supplement: supp [file elife_poa_e43598_Supplementary_file_1.xls]

GeneID	M-huPMCs1	P-huPMCs1	M-huPMCs2	P-huPMCs2	M-huPMCs3	P-huPMCs3	M-huPMCs4	P-huPMCs4	M-huPMCs5	P-huPMCs5	M-huPMCs6	P-huPMCs6	M-huPMCs7	P-huPMCs7	M-huPMCs8	P-huPMCs8
2335	820020	1706891	2164904	348459	2825046	1133744	4357739	1555913	4056578	3046674	2117925	239077	2844308	1059908	2752590	448348
60	664079	316630	242444	214366	450522	314939	379368	606248	407946	283569	417962	245320	300921	256993	393609	251615
1915	478595	521446	437562	398451	605448	575375	687196	406283	576599	534523	693552	461498	626286	536195	822571	534151
7431	468174	276701	274489	325844	293057	396737	401217	440877	280061	260096	308454	312576	279427	330561	338775	368469
2597	409933	251771	165231	139208	292648	166287	397729	490551	275026	204700	382033	158694	311001	170496	281657	173004
6678	393358	695804	489212	372243	747883	944743	1039051	670436	943107	840074	897914	331126	828998	726273	1023330	389895
1278	333938	681352	683736	260955	704078	338343	1075829	555458	838716	537147	709123	108508	1187610	463692	1119372	173651
3490	267131	228947	139787	131865	344843	252607	439944	550240	306598	348543	396129	150172	259092	155302	396193	166879
1282	263373	416283	313213	62253	423387	125095	663041	381172	565311	429103	463306	31446	454249	121393	679664	80866
1277	261607	608379	689521	136067	391463	86019	909825	353341	532320	354277	751172	57739	893221	289100	766840	120350
71	256104	210774	167066	185923	239582	265443	257216	220396	237642	176476	239216	210975	203715	222400	238974	224886
6876	241881	230535	102277	132454	230871	257253	288983	272157	213607	193598	314060	151649	201856	168828	301439	194061
59	213224	219964	81494	63040	104039	132034	212113	167007	77906	70933	266193	84893	158799	100596	195725	96665
1281	211121	334260	380149	33279	503991	79855	592567	429992	419390	252937	546827	7131	704364	222318	745498	26227
7169	199001	92199	51928	43760	91512	70377	118475	181596	73989	68511	138723	30623	92635	56274	121344	55869
800	183690	273591	176677	101678	435215	250766	511750	288885	435420	321560	296026	92084	325987	162537	446579	137008
3688	158122	220059	182114	132610	244456	271428	394919	206371	285186	272330	251432	106016	247538	178719	269255	131500
567	140814	72934	65892	29228	113016	31523	208451	159423	238523	173376	131118	38051	124035	45231	163973	39858
11167	139582	195831	155015	105272	234553	167397	302798	146634	296340	194323	202362	99238	215788	120719	289293	112492
10398	137954	75880	51333	34491	120697	64085	109277	154843	92648	66435	110717	36385	85547	53777	117292	46267
7114	133894	104133	71630	67560	127593	74439	151766	184990	138425	120805	128855	68326	106055	69481	137932	71401
1284	132673	252785	187844	42836	282583	83489	372654	196467	336775	280654	311440	24042	306446	96197	443221	64185
7178	124202	113113	78612	81259	146694	110940	150851	162639	106711	109269	160932	103450	132991	110042	186064	106244
3939	123342	132605	67460	34129	165927	55069	255922	166979	177869	107225	152690	49290	147972	51018	125626	49051
4637	123272	105721	62949	72173	120909	92500	161758	127439	122396	103659	143260	73426	122207	65319	138423	87322
7057	119427	226795	327783	189478	476049	322258	747601	235935	650082	379814	382221	143564	500550	163933	431848	164934
5478	116781	57288	39284	40048	58678	47754	84502	96840	66891	57958	79105	36255	63975	37319	75445	40107
7316	114764	85061	77421	88852	88988	89727	127602	112379	85941	77355	96663	64654	93959	67959	104804	73469
3956	111490	60609	38720	28845	77679	37163	106493	128544	80754	63308	81860	28165	85969	34269	83297	35860
2778	108748	49633	38389	39113	70190	56850	61143	105675	54711	47114	64747	45208	48490	48233	59750	42459
302	106920	94678	93978	114022	89666	114275	167379	113924	105818	92571	96696	96729	121916	79024	102187	94456
7171	105423	103129	82185	38255	104324	55166	157223	108590	126249	81663	106271	24367	114323	54072	129390	41920
6277	104893	35732	26178	17936	51956	26424	64121	123350	64882	54742	60376	23320	65170	23211	68972	25799
5315	101089	121574	115091	132153	112024	146404	185336	91882	143588	133269	118059	117224	131209	101501	109633	132843
3487	99065	29900	50415	11679	107145	13825	78148	109521	56764	27165	83500	12214	115971	16492	79931	18859
811	95830	73404	87003	78341	80092	79761	124979	92275	98058	83890	80558	58823	107657	67273	91466	71953
7045	95255	112000	106583	58324	101089	42327	97494	62693	34837	25135	111786	16456	120312	52416	123743	36005
9168	95211	50695	34970	22669	57757	23972	80524	117424	50677	41474	73905	18896	65839	25023	66517	24913
2023	93253	132262	82975	114305	115422	110913	162569	89573	110452	89147	128178	118819	116711	111051	101472	130220
203068	92490	63118	54948	34845	72033	44694	96022	57632	61686	49904	63059	34688	73497	37730	69781	43173
284119	92185	84684	70184	35440	105166	56324	127244	92078	81149	63895	82147	28526	102379	34132	100521	45433
4627	89650	134628	130718	85587	170357	135428	172497	97976	207397	151358	170834	61514	133422	93296	190563	106283
3491	88345	45024	75524	70650	90991	66167	95825	117745	92469	62734	65442	44332	73274	47911	72132	39051
1291	87757	93142	127728	18733	149689	24266	179484	129831	92753	55320	146580	8338	189806	46181	158109	19225
7168	87355	142353	75827	100606	135154	193614	171198	127931	159249	160829	114902	132578	98087	144422	136871	142821
6124	86760	51504	40011	43533	53088	62845	64408	69196	50583	48989	72967	53194	63386	56548	84402	57850
5054	86446	149219	104238	129077	221029	192375	373877	214396	217677	207149	137107	103872	178871	164712	132108	162541
6222	84555	44629	30665	39052	40524	48443	55539	69694	40521	44406	67343	47439	53011	45133	58058	45126
11034	83739	53288	48958	26658	72234	47603	99932	64367	72661	45498	58041	33721	73587	37270	77631	34402
966	82734	71006	62890	61901	91502	92018	153184	94336	146417	109512	85083	59544	93379	66249	98310	78970
57142	81258	56847	56609	98056	74118	128347	83320	76183	76606	76166	56769	104688	64923	101926	66052	105777
10376	80556	58046	51019	30774	55791	26625	90208	59607	53480	38671	50630	21659	66389	21220	56738	32191
5034	78811	77756	66985	65978	97349	89443	139410	100594	108979	88500	100128	56188	105162	73608	90689	76512
1490	75760	124502	158362	124730	250910	267959	319758	120715	308098	229160	149477	164704	177466	175272	195103	183655
2316	74929	178113	181665	155693	196652	231050	231554	86724	229119	203249	186322	117217	170463	153479	216664	197789
2006	72537	109170	132400	44318	29152	54148	109194	19258	100115	41383	178613	24170	266914	127498	260581	60516
100462981	70706	19612	14609	15683	64217	29257	31025	118173	22894	27484	33818	27201	15992	19500	22640	13700
308	70685	44525	48115	44580	55299	61120	81286	70243	57803	43903	56463	39788	68146	49721	52951	41720
1292	68764	86405	109305	14989	145277	23037	137024	91764	86054	55861	132657	5361	145103	41994	123130	16833
1937	66150	54512	46234	59373	60735	82446	66946	48304	52408	50785	69968	67438	63711	70103	75170	73749
6175	64932	59390	43505	48707	50637	56698	64393	56849	61345	55859	65607	46445	66893	49127	80651	56935
6194	64263	48489	32299	41593	42289	53383	55709	55597	41092	42775	60827	49605	50699	48666	67869	54553
7076	63359	27662	23110	23569	36866	39821	61897	102539	35624	37419	52510	32931	26078	35294	39334	37371
1290	62693	89734	104010	21675	109700	43168	176245	96798	183676	118299	100885	12912	165082	51784	145280	20111
6122	62210	57783	41591	51690	52571	70722	59760	49733	46866	47746	71941	64097	59716	65498	85290	67517
967	61835	31829	33676	38311	52568	48730	66110	61681	59656	55178	58299	36042	58280	38967	46461	33112
6130	61040	35123	25126	29078	33242	38713	44326	49876	33054	32310	53764	36845	42102	36263	54147	39112
26585	59672	51203	78832	28699	157660	41199	186205	111502	161412	62566	106783	11717	173623	51959	124701	25942
633	59303	65357	75995	15190	62235	27426	73544	70002	66894	58759	100992	7028	69630	48664	68648	12720
805	59064	59064	39953	47481	56714	62617	86685	62382	67979	52944	56652	45556	61742	52642	70896	53550
226	58678	45021	37882	32242	65442	47196	76327	71309	59051	47181	62428	38906	61510	42984	54084	40914
3309	58588	50178	64244	61533	61699	74776	113238	67792	62156	61036	45260	45087	85658	50640	85858	45680
10627	58396	43023	24313	21559	63919	40415	75110	72490	67200	53492	57369	27178	38891	24305	67179	27540
1072	58337	38132	33457	33984	42409	44574	53191	46168	40002	31701	45070	33049	46310	37671	44446	36947
871	57832	52364	61591	21733	42374	26901	77951	51822	54079	39390	64042	9443	81291	21839	61767	21195
3915	57428	63724	88315	25600	57105	33233	122486	41277	89093	49783	71648	17446	120015	38678	93710	25451
6191	56717	39911	20577	23885	27303	30347	43964	44122	39214	34998	46969	44512	32120	31668	44868	28974
59277	56600	52774	42629	4239	105947	9563	129198	88895	109959	60732	60348	3086	88528	9385	91056	6055
6138	56346	42294	28758	33276	44796	47165	53272	52279	36205	34470	52557	41696	45425	42437	60767	45561
6187	56313	42523	33559	38739	38883	40693	46037	44227	39744	34231	56343	34327	49619	40074	60374	48923
6157	56264	32427	20965	27887	26609	36493	34606	48432	26536	26509	44929	32913	33321	32119	45927	36543
9445	56222	34001	33883	47408	64768	79363	70630	82613	60838	49432	41409	58826	46669	61353	56549	51367
7184	56162	73421	88032	83194	74114	92481	179252	80482	83384	79131	60462	62768	105160	74634	91263	67239
10399	54931	29431	24074	24515	34496	34140	35327	38582	31952	29479	38939	27985	33443	31061	40594	30159
857	54736	50215	51862	31317	75805	33416	122378	77480	68047	45991	45442	23161	80764	26479	63445	37575
6282	54650	20748	14412	9683	19146	11695	34242	48279	24811	22281	27494	10430	25864	10272	27169	10019
1938	54533	70958	71150	68872	81169	104191	87695	48955	83742	70789	86532	63736	81146	93842	100649	90428
5216	54489	37009	28938	20368	45679	26248	58191	55396	48673	36848	46538	17223	46795	23430	45998	24368
3181	54284	27873	31742	26819	26581	31342	37799	30891	26610	22172	25592	22720	33573	28267	28634	25454
6143	53836	25738	18577	23001	25260	29602	30094	42179	24883	24461	35901	26728	30837	28172	37052	29016
11098	53709	60134	56349	53007	51597	71149	84965	42203	87148	56164	41655	68928	90549	57110	58364	78748
103910	53547	32540	18906	16793	34853	29099	50052	60734	46150	36647	41093	21648	31087	18483	41595	19801
7534	53400	41684	37931	32813	39566	40514	56948	42990	53928	42831	41269	27959	49205	35777	51386	34631
334	53244	44216	47613	57606	44689	85523	84519	41448	87652	66502	35696	54404	55647	60417	47714	66514
6229	53020	29880	19387	26190	26246	34907	37435	44745	26746	26530	41494	33613	35976	31903	41740	31907
27122	52317	70635	68483	144671	87083	208815	77755	58848	114087	147124	56111	169418	73656	167911	84848	237193
4869	51922	31368	28819	23759	27382	26824	46842	31754	34186	26782	35693	19449	43002	25319	41551	24010
5479	51688	30325	23700	30738	24937	33660	45002	40326	34064	28939	31816	26082	39222	27843	31412	32869
301	50825	38294	34677	53810	31631	53758	54651	45156	38431	34618	29843	42535	38736	34635	39174	43564
6128	50221	36231	24149	29685	30591	38542	43210	44482	29481	28729	45154	34931	42621	34109	49545	37099
23022	49966	60820	39945	31994	67247	53610	87487	43984	65739	49329	61950	33629	49305	37923	70626	35659
2495	49747	41670	68305	89600	48091	102993	36256	42354	47523	76269	72143	124202	45805	123801	53061	77225
6133	49331	34919	22532	26189	32995	35045	41573	50621	29357	30951	45544	33856	35330	32544	47820	33544
6134	49230	39236	28386	29791	36772	38994	47886	41844	36822	36907	51340	32551	46391	39102	60165	39042
6132	48656	29631	22847	26878	33770	33473	34937	39030	30699	28307	42361	30098	36381	30720	40296	33174
2512	48600	29893	41897	49263	37472	61967	43965	56255	48530	77502	94196	72106	58294	65780	59569	45652
3927	48555	44650	35370	12649	57902	22428	68620	39423	63517	39613	50642	11817	53883	16554	64272	16353
10631	48367	243684	200985	51641	74799	140034	187615	83871	56493	109160	123451	11012	237460	147137	153117	27017
55075	47845	50048	54514	24730	62606	45003	96740	81979	67167	57115	53357	29960	62971	32709	62170	24405
6125	47836	32704	21235	22722	28411	30423	39483	40859	28451	26284	41502	28551	34972	30557	43284	29694
6176	47721	22668	20906	23586	28134	30039	28114	49451	28731	24501	33182	25685	28361	31382	36024	27592
6202	47178	30225	20365	21167	27915	27038	36716	46316	26259	26718	45085	27017	33482	24641	45522	28181
4017	47039	64499	60436	12172	109818	27547	136051	61237	97255	59114	101469	8792	113161	25635	95736	18201
378	46734	37534	26071	23273	40050	36485	65351	47265	44324	34703	39873	25113	44965	26629	44319	26452
7314	46433	28881	29204	34454	40906	40828	55136	41840	35529	30306	33281	31241	38231	30489	36376	34584
7980	45810	12625	12818	920	26408	1233	40328	62206	10396	2522	10677	126	53476	5451	17557	437
4071	45499	6851	15192	1086	33036	2764	40073	44132	11719	5515	11034	352	49527	3099	20288	881
5358	44825	52288	37241	14937	50297	25709	84448	40585	66662	43673	50056	11473	58603	19908	71316	17647
5351	44393	50571	36503	28324	65880	45855	102405	69357	70966	57450	67147	23169	59461	36704	61280	34736
3855	43761	42796	22762	44526	58156	67844	51419	83343	53002	47191	31298	59235	34237	31915	41803	39854
6189	43588	49834	35252	37681	47413	51827	64965	49923	44874	46771	63633	45847	54634	46948	73387	49767
1289	43126	79404	101249	24607	73947	45213	127237	60142	110386	87625	99647	10061	127031	52671	109392	23888
51232	42678	48726	42921	52653	61490	111430	92021	54737	103983	71911	60005	66930	62029	65049	82775	62398
821	42575	44528	57003	57591	45696	76889	92743	38333	63661	50209	41657	42286	63018	57736	57311	51729
6205	42191	26185	19070	23592	28777	29563	32459	39285	24051	22272	38109	27790	31689	28696	35588	27386
10097	42026	42150	33523	23464	44717	33755	68184	36955	55315	36688	39956	21551	47005	26750	48296	25167
813	41155	71030	64242	47339	85667	91009	151872	39555	137215	94511	69802	40604	103986	58467	96613	51300
1982	40431	53111	54207	52254	52579	74334	74709	28400	57743	51477	43895	45191	58920	56411	60976	58078
1410	40294	25554	30278	64007	12948	76082	14664	12590	6966	22701	34126	103662	7639	61264	17552	61682
10169	39879	20966	13648	15193	23756	19525	29744	53229	23005	20676	31011	18533	24222	14845	28671	19340
2923	39867	44015	41155	37733	44243	55201	77050	53952	58729	44388	39031	32755	59225	47391	46703	38199
6171	39592	52217	37353	52425	48878	61187	67615	43247	53628	54603	68097	58086	66372	56094	75129	66662
682	39089	23691	22971	31180	30552	34510	43389	60623	33897	30205	38959	30397	31943	28346	35372	39182
87	39034	52898	49600	44640	69395	67048	85193	45173	79887	69204	62408	40081	62071	47694	70255	46350
4430	38995	28385	30122	19788	43448	26064	60984	40267	53065	33811	34918	14077	47958	20433	58642	20241
3190	38986	32101	28700	26444	26873	34032	42517	24875	32911	26779	30391	24855	35940	27759	38735	31167
3106	38919	28360	24335	11359	80927	20406	84535	72091	85755	52935	68490	15606	46516	16934	67939	20310
6136	38811	24485	13014	17453	18754	22027	21209	25916	18557	20736	33978	20109	22422	18773	38355	27423
6152	38359	17762	11307	14657	16283	18457	22140	31089	15932	16216	26138	19115	20538	17336	25856	19141
6188	38352	29725	21440	23150	26992	28681	35355	33227	28879	27921	43426	25518	31864	26111	40659	26268
3875	38156	28456	11912	2843	20528	8077	47669	41328	14774	12501	33495	1476	26081	12979	34115	3934
6201	38088	23378	14927	16024	18418	16709	26678	33063	17574	17768	30915	18158	25061	16891	28975	20806
2200	38006	112165	101293	86132	89814	150448	145721	43098	151108	102435	74138	64618	116807	106575	101650	88049
8682	37885	37902	33414	52147	42935	85522	48714	36327	60913	60575	37293	55669	35313	54946	48367	61241
5660	37840	60150	73871	135788	57940	160019	74334	30775	81543	127204	79544	129370	65978	137082	79756	139762
81	37323	51190	42103	51279	51935	69503	61860	34114	62659	52650	43197	50135	50710	53923	62008	75328
4478	37064	43391	39975	40007	39664	55874	68887	35297	65029	58834	40711	36207	45905	41116	48230	45631
6223	36940	20119	15087	19671	23400	23296	24722	37006	19754	18760	30808	20838	23804	22616	25803	23320
25932	36742	56199	48899	41697	73700	72431	110645	55716	99953	72596	51069	35189	71675	49079	74735	45446
4000	36626	23362	29464	13216	30760	14105	45538	34928	34613	24395	29615	10335	42995	11423	32393	14519
7414	36396	50805	39609	50658	38273	84422	75465	30177	52606	45144	39129	45667	53499	45630	54761	56894
6224	35869	24758	14013	19674	20525	23792	25415	38474	18800	18233	30477	23569	23419	22864	31652	24161
3326	35762	31757	39124	33936	30867	49053	57493	19893	48051	38683	34732	28696	44893	36221	36626	32481
6228	35457	22439	17611	20350	21953	26208	26163	29949	20526	19908	28527	24385	22552	22917	32030	23833
6160	35402	23736	14352	18963	21688	26349	27136	34667	19872	20599	35526	25924	25813	25047	37215	26056
176	35125	26935	37409	3963	39061	4785	44373	13344	68461	49274	14628	3577	34681	3743	41621	7841
9349	34805	24251	14690	18402	23192	23312	31076	32011	23861	22440	37942	22909	27530	22959	39581	24270
5757	34705	23884	19724	12442	17238	13922	28546	24090	20935	15146	21791	10918	24498	14409	29994	13265
6168	34619	23529	14538	21498	22880	27116	27891	36901	19667	20436	30729	24762	26079	26797	31766	26565
8614	34582	27614	27825	6632	40395	18559	65978	33231	85730	33440	45928	5965	55573	10526	37136	7273
100861532	34565	17906	2773	19115	3904	10421	16285	44534	9124	14125	19473	27936	14674	18151	19111	14169
977	33979	28952	26214	38690	39881	50050	49836	34972	46433	41106	37480	36360	30965	25277	35110	47119
6137	33735	23705	17852	20909	24873	27643	24829	36200	21971	23436	32542	24235	28010	27404	35757	30442
79026	33503	56455	78327	45329	63844	68068	98404	29094	104415	68719	44289	38559	77223	48165	65060	44465
7167	33176	47432	28500	25542	64422	31906	87111	48965	52551	37743	60177	30581	58280	28580	48391	33104
23089	33155	15439	17558	15100	7359	18065	9267	7160	2758	4925	7093	20423	11354	6849	10797	18575
6135	32993	21178	15337	20091	20230	25497	25197	25361	18390	18957	32216	24607	25490	24267	31430	24368
7077	32954	37860	41353	33214	53111	55383	67733	43160	72418	67087	68092	35483	44596	42908	75795	37393
5552	32412	20092	20763	4681	48986	10436	92842	58331	61445	38127	42687	3515	47775	8589	40750	5518
10410	32399	12006	11838	6229	14827	4952	13343	31236	14383	17360	26284	8864	18177	10152	25603	9766
10487	32359	45474	29881	35154	37447	50534	63801	28803	47020	43149	39304	34152	41773	35743	45451	41231
309	32335	29609	23130	9949	34307	14393	58316	31194	33905	28005	34995	8237	36022	11720	39074	11991
3320	32203	34332	51354	53860	38930	61558	70737	23420	62126	59039	46667	47275	45913	43497	47442	44302
3183	32188	21126	21654	22712	21584	24042	31140	23102	24480	19604	22940	17499	25303	20073	26725	22152
6129	32160	38567	27366	39832	31528	45339	39391	23415	30197	27084	41472	49653	37915	45143	47095	47777
3486	32021	28659	26200	80814	19321	173310	11151	13870	44940	41910	8012	97781	29508	123853	25825	106227
4904	31884	23818	22948	17905	30618	20607	34509	28165	27953	21836	30866	13439	28099	17394	29564	17440
387	31705	35981	35513	22646	49680	34266	64091	32984	55064	36498	39712	23140	45793	29578	45622	24578
6167	31648	17451	10204	13598	14816	16928	18855	31072	12880	14723	24827	17900	18129	16914	25147	17454
4082	31456	23058	27292	16290	31208	22420	36262	29143	25802	20262	20415	14941	32278	16338	27646	15611
2791	31434	5376	6842	807	13632	1236	15207	24194	9223	3147	7099	621	20316	2081	10787	653
6210	31001	19371	12312	15853	16673	20073	23155	27180	16100	16031	30384	20200	21343	19389	27153	19554
3945	30993	18889	18563	15141	25109	15122	32129	16104	25610	22111	28436	14341	29481	15628	31200	14923
6772	30978	38890	38039	6876	63489	13445	109468	30556	107199	78280	56901	6017	76473	16562	82188	13965
1303	30792	74491	53390	20650	97713	34733	102721	56985	46210	38037	58289	12897	81094	36735	95219	18764
23521	30763	29321	24356	31117	29265	36573	31468	22094	25760	28582	42056	34292	35325	35308	45514	42601
11010	30569	27112	12540	18763	27382	38356	50815	45515	38078	33877	30082	20820	28592	24755	22759	26627
60681	30510	26457	22207	20193	24678	31364	37783	30115	28642	21767	24899	16486	32627	23626	24983	24943
1213	30417	34609	41374	33324	39404	49122	63347	25374	54280	43092	33376	27789	45149	34526	45316	35418
9045	30357	12871	11754	11218	14493	16622	18389	27044	14251	13564	20416	14807	16666	16939	19006	12810
4666	30140	17285	14451	14095	19176	19499	23775	26962	18272	16170	23890	16612	23593	20486	25737	16071
11224	29909	13011	8339	10044	11556	10928	15232	24641	10882	11705	18882	12194	14713	9628	16760	12499
1634	29892	21087	23451	1648	43066	2004	69746	23596	25056	19420	66486	932	71855	7510	103201	2167
5352	29890	43295	33949	39301	48785	61504	99508	77797	51098	43372	34714	40308	37716	36431	36526	28331
54407	29780	26870	31609	16367	25028	22932	46863	36691	47459	27729	31295	17177	39519	19540	47627	13393
6170	29729	21796	13992	15693	21564	20052	27648	33911	23366	20167	27027	18946	23508	19433	30645	18785
4502	29598	8628	7423	4954	7766	8442	18774	29073	10340	13788	21138	3541	11059	9744	12174	5444
1655	29586	32503	30956	32862	25414	41451	36667	32156	28551	31270	29590	30330	34108	37252	28867	32014
23741	29575	19234	14018	15382	21349	20993	25636	28213	17549	13874	20091	18114	19751	18010	23261	18471
1545	29386	11741	12309	16895	18204	26233	9198	6457	8743	8915	7341	10950	15963	14546	11310	10786
4008	29339	26120	31795	21991	47813	71772	71369	38037	46402	38757	31508	27252	46110	26150	49410	31208
1191	29224	37418	26644	128029	8298	120300	3719	4216	3246	21764	13269	174643	5175	189411	10189	154668
468	29180	25723	17333	19690	30060	31197	32063	44427	26878	23974	22623	19822	27449	24092	32136	25581
3178	29023	16617	16159	14173	12419	15361	18748	13569	12913	10354	14322	11813	20186	14446	18790	13618
64129	28881	23521	9290	1217	22014	1581	32647	30974	13054	10576	20667	653	19755	2748	27721	2358
22795	28853	14817	25744	2028	30392	4533	65732	29935	48075	36430	37185	2020	41512	4097	34799	2688
9315	28828	43456	36954	7797	35532	8345	68087	45955	46931	29590	56695	3345	44326	16924	61477	7668
6161	28794	17881	13721	16477	18868	22017	22603	28492	17454	18193	26722	21597	22922	20757	27680	19881
9948	28749	42493	27371	30396	40609	41335	59391	25171	52183	40660	38825	31356	39025	30385	40663	42299
6154	28685	21360	13368	17579	19622	24945	25645	24523	19229	19933	32093	24275	24930	23575	32457	23499
11014	28650	21815	21854	12677	28361	20524	43274	28782	30459	20595	24302	11593	31919	15478	26312	12241
8490	28618	50913	4297	1465	15590	7575	31339	20512	10729	5159	35163	8648	7935	5893	31508	3432
351	28609	32278	38739	62129	36329	111661	42130	25902	46408	59726	35790	65378	37897	86635	47672	70960
6159	28596	17133	12908	16030	17915	21096	20016	22754	16352	17810	24431	18780	18299	16853	20221	16194
80781	28552	45882	45077	96069	33100	104637	36713	24439	46492	45303	29115	86754	45829	107884	38235	147008
6208	28537	23768	14204	19712	19334	23032	27247	26695	20574	20055	29757	22792	24337	22825	31628	25984
26509	28484	27577	41296	15995	40565	24098	58424	27554	64697	43965	33858	8165	48821	16660	51250	14221
9643	28441	24155	16096	14715	21069	19113	34185	27387	20053	16187	22851	13287	24924	15281	27178	16967
6146	28386	19303	14180	16801	17901	23936	24175	24962	18165	16863	24605	21853	21164	21350	26817	20577
6155	28312	21532	14483	17510	23970	21347	30362	27624	21875	21864	30186	19293	26330	20484	30231	22314
131566	28287	48985	54804	117772	27377	141029	33441	14803	25933	41703	20483	88637	31038	79370	25887	128939
3315	28227	18175	13123	8915	24631	9614	24108	38367	17857	13823	29217	5639	19270	8872	25260	7110
7094	27716	37587	48156	37207	41537	52901	62128	28400	53446	42564	38445	29279	42483	35558	46135	39417
5230	27700	63225	37440	29145	85526	40539	134491	44769	84734	63697	77268	32016	70806	37724	70200	37913
1266	27668	33509	30753	50927	34630	70375	44194	24844	25344	28763	25205	51314	31177	47067	32124	54903
3105	27646	23854	20266	16614	59408	17180	67154	86782	86070	57284	40380	21859	43747	26889	49868	27678
4673	27599	27976	24694	42529	27148	65653	35415	29593	32873	34997	29524	34513	33408	55254	34327	41359
1508	27479	31121	29568	47027	30096	48084	36219	23073	35080	65634	59808	57088	25688	41917	33024	47246
7846	27462	48989	42683	71942	49521	60711	51796	29369	27560	41343	32181	57881	38122	52391	40542	73769
8407	27431	24292	20687	19916	27893	23682	35676	26302	37826	29534	29027	16593	27185	21897	30007	21728
84886	27388	31884	16498	2856	28980	15915	32464	26097	26394	17476	37212	10523	31431	16358	44076	9929
7009	27300	22392	25598	28643	31252	38363	37204	20300	37236	29482	24270	26698	29684	28242	30124	30613
6233	27270	22737	16269	20111	22550	26148	33175	22481	23820	21393	29718	21747	27609	24117	29866	22358
84790	27118	16851	13383	6807	15704	6411	28026	18649	19502	14612	16586	5167	24886	6558	17811	8040
439921	27018	31892	19563	34435	38782	68569	49701	43767	44706	39832	40509	46632	27919	42843	29509	44429
3107	26947	23794	20011	18733	29818	9892	64052	53349	44972	31816	23548	7267	23510	13065	31953	16232
10611	26912	29694	20868	9468	22794	19202	50031	27665	35277	23634	25326	7631	29328	13120	32630	12098
960	26807	28413	28953	60601	25578	81790	32367	20084	23979	27644	14240	54464	33392	63563	20865	67585
23471	26766	21769	24874	14553	34158	24657	47400	27140	31034	23776	23635	15512	35782	16386	35020	15734
5954	26752	24894	24021	23654	24820	31079	35487	21470	25005	21447	17152	16573	36296	24260	24415	21101
6164	26689	16213	9456	12419	14322	17782	19004	25355	13387	13266	22573	17624	18362	16408	22240	16462
5250	26574	17968	15605	13241	25731	20211	26208	19417	23764	18471	21073	14629	23932	18430	25139	15548
4015	26364	61370	36557	28346	43168	52373	80393	48202	35932	32924	49622	24804	51198	33039	43084	25846
4735	26274	36650	34470	35269	32586	44310	57385	26173	42530	32923	26930	28573	46886	41294	40083	37110
2273	26156	39191	16043	19593	21086	36981	56072	29698	22867	18353	32463	36819	24648	27222	35927	32218
7531	26119	19726	18827	20838	22866	26091	29589	21381	23027	18393	19031	19386	23629	21530	23575	26272
10933	26096	34315	26532	20614	36505	29190	57071	28749	40730	28699	30179	18206	41208	23269	41958	24436
27020	26065	18673	13765	12394	22371	20615	35556	30063	21476	16756	22164	11939	26459	13415	24666	12281
4946	25982	24408	18228	17859	35922	24627	39129	41360	31927	29101	29297	17397	32317	18848	32431	21362
801	25950	20510	17571	9126	23666	13906	32125	22586	28370	20671	23125	11526	24319	13027	25039	10598
3192	25859	18557	20693	17658	16806	20675	24492	16405	19472	16328	18793	15436	21405	16584	23560	19068
6206	25819	22346	17849	23565	22669	30373	28410	22506	21533	19327	29589	27278	28426	29673	29511	26090
6230	25756	15757	12092	13858	16667	19720	22667	25029	17306	15835	24276	19069	20697	19029	24114	17302
6203	25670	19913	13668	17236	15612	18889	21495	17871	16666	16959	23905	17562	23356	20080	27779	23925
1984	25641	16751	14105	12376	12580	12563	21337	19098	15582	12722	15292	9063	18262	10195	16678	12972
3685	25601	61727	51115	54121	52038	93879	114596	27797	71599	61323	56953	63760	61576	77511	65988	64059
10096	25599	26248	21589	18630	23924	22444	42967	20830	36128	27134	24154	13214	28321	18007	31438	19333
8754	25576	40950	37041	25222	55797	42896	77612	27951	71490	50229	37834	21879	54772	31090	50538	29228
10383	25483	11469	10115	7239	13020	7449	17545	19560	12386	9919	13351	6660	14570	5857	12444	8336
1832	25390	45769	41073	13141	39395	30905	71423	24112	77168	47492	44190	8056	31384	25598	50756	19800
72	25303	18158	9353	1377	8579	1108	17510	12126	2186	3527	24856	1245	13180	5032	8987	1825
4691	25285	24381	25147	22804	18121	26824	33917	15744	26092	22572	20566	17758	29931	21722	27740	22425
5768	25215	31825	30632	22016	43110	35234	65166	25197	62580	47781	36827	19930	50794	23268	34008	27546
22872	25205	21205	20486	15319	20845	22053	37660	25141	21451	16648	22046	14080	28522	16710	27149	16736
83442	25046	9664	7490	5541	15794	6731	18124	30553	15647	10953	14970	5691	14030	6581	13577	5777
10094	24966	13417	9533	9458	13900	12108	21038	23085	15329	13224	17876	10232	18003	10188	17624	10753
51330	24816	12641	9194	13599	13027	18073	16520	21242	14952	15009	16074	12569	12850	11111	14197	18617
2878	24683	22533	26583	67688	2226	70619	2026	2258	2103	25041	10937	119967	3665	138669	5026	101962
689	24652	16993	11660	12929	15945	17019	21139	19741	16474	13839	20013	14651	17710	15035	21329	14928
6727	24550	13925	9936	14644	14807	18854	18361	22047	13674	12840	17666	16930	15143	14490	16181	16017
55752	24547	37307	34520	26181	32202	44484	54111	23350	58366	41613	35039	20677	35253	28013	45567	26608
826	24508	15739	14341	12349	18121	16823	21738	20419	21049	14661	15981	12050	19777	13931	20124	14306
3959	24259	18127	18618	15939	30041	19919	28141	29349	27452	31225	25545	20000	23433	19600	31412	27933
9500	24150	22465	23523	20200	29007	28128	35881	21964	24738	17290	19184	17211	31983	21041	26581	22930
5052	24113	16210	12209	19391	12087	26726	22752	15540	18914	17654	16624	23672	18966	15843	16998	16022
3921	24072	22805	19806	22784	20140	21462	24332	19812	22813	19324	29866	21717	26067	19188	29165	24432
1192	23918	15917	12227	11146	18464	13336	29277	22186	24084	21159	19198	9556	21042	10230	19821	13077
29927	23911	29006	32129	35059	36031	48626	43766	21862	33198	28993	25214	27762	38164	31265	30552	34313
6139	23787	10800	6718	8385	8938	11079	12631	20557	8441	8764	15686	10942	11140	9448	14306	10316
3069	23663	39316	42785	36371	49761	59575	56066	22045	49099	39516	35825	31440	49478	42234	45712	40901
5654	23438	21917	17967	4886	23519	4479	29442	36862	14278	11316	30681	7759	24895	8801	39638	5939
6141	23416	10342	8592	9921	11675	12719	12543	19366	10588	9715	15663	11929	13326	14228	14048	12760
7791	23382	21136	17493	13892	29799	22941	29032	21691	24170	18550	22057	14131	25431	18289	23673	17012
3912	23348	22059	35272	15106	38927	27889	48496	33298	43406	39813	36751	9037	47880	25345	40271	13192
151887	23340	45745	39672	24669	54999	62847	59818	32074	37646	36097	58435	46762	61440	40581	49359	28193
858	23288	19185	13500	9717	29590	16010	34768	37559	26464	20057	20927	9661	24052	14191	25889	14268
1495	23099	26603	24696	21716	30519	29565	43100	21025	34013	24586	27690	19888	31792	22290	31586	24666
1173	23095	29063	26134	31710	32882	37942	41697	26691	30883	26121	24227	28695	32699	28200	29680	37449
84617	23023	16922	11662	8015	17656	11928	25245	22074	19435	20394	22850	7152	17788	8306	22655	11829
754	22984	22258	19016	25257	18994	31025	30809	26015	25701	23371	21608	20149	20835	20216	23960	24283
3021	22908	19877	18741	23078	16481	17889	21858	17044	18747	13787	18372	17499	20687	20049	21933	19805
5159	22880	27065	33098	5012	42038	11394	53025	40233	37905	25875	32064	3424	41962	16337	55729	6258
4131	22855	30546	31047	32632	22840	65370	24763	15840	21740	22968	17687	32722	19523	31460	25981	46687
4267	22849	16392	13672	12113	22971	17736	28796	27484	28631	22635	19642	12790	18136	12584	17862	13048
6747	22816	25103	23403	18175	41853	28748	52106	21684	44420	32870	25880	12634	36829	19861	33066	19491
1075	22705	12675	13083	15344	9055	8034	10794	8977	10964	10400	6284	13789	7211	5859	9262	9898
444	22694	21973	23562	17981	29835	25111	50618	19149	34585	28134	22898	18254	27422	21341	26330	20350
7311	22682	11536	9024	11109	11918	12456	17512	18251	11272	11638	17918	12200	14778	12834	17423	13982
6383	22622	24802	26647	10273	23423	18182	37239	13593	44368	28361	27067	8715	30984	11564	38576	8293
5223	22621	34674	24863	22471	47956	33488	59990	26027	43151	32299	35425	21936	39542	24788	38408	29928
6217	22453	12691	9982	11918	13967	16389	15184	20174	13917	13052	18898	14203	16023	14351	18236	15080
4741	22386	7974	4679	155	27598	110	49361	47447	10568	5592	14944	161	20636	645	20365	815
5093	22370	10731	10371	9108	11577	11240	14058	18540	12080	10003	13752	8827	12345	10183	13792	9923
1727	22359	20332	19505	14568	37098	23810	44618	32730	41938	27901	27863	17025	34402	18845	35918	19478
3146	22342	14367	12731	9822	9863	11817	16655	12947	12661	9627	12861	8007	15559	11446	16928	10249
2697	22171	24987	34452	21811	75457	27519	78573	36709	48610	36881	43111	16576	49196	21155	51164	18256
3151	22029	13251	11995	8302	9359	7906	13737	12182	11462	6579	11286	6544	15110	8813	14807	8629
4035	21959	56057	72696	61979	59871	107425	81022	38328	100009	92716	56853	48011	61652	76889	70782	63116
4052	21910	30126	11689	3670	16862	10719	31296	20705	19818	20098	21354	4294	24433	11004	33605	7071
57515	21878	22791	24236	23068	32455	37249	45824	22346	40763	32581	26795	21954	31294	25599	36701	24631
10979	21877	24181	21442	10292	26267	14244	39837	16493	42271	25525	28575	8180	30860	11919	37249	10996
10209	21776	18053	19413	17494	26547	23582	27120	28443	25580	19039	22542	15938	23423	21044	25018	15565
975	21658	15098	13772	19959	25250	28529	26160	30321	27459	24497	23608	25480	20217	24580	20958	23482
55740	21641	25303	18513	20031	34633	30102	41613	18489	25167	19420	25088	17739	26841	22525	29063	19502
4256	21610	16623	16078	2313	11396	2516	28699	22620	18031	10301	28552	1149	22561	9476	27887	2426
23406	21477	12932	12130	14622	8229	19944	15808	16998	9273	8959	11872	20579	15358	14016	11250	19121
23193	21467	29217	29273	26249	26037	36995	44169	17738	38610	26042	22829	20357	37896	28245	30671	29592
389	21467	24061	14626	22794	24965	30859	32229	25369	25773	25181	25348	26148	21549	22321	24220	29683
54732	21447	18277	14577	18885	22022	25027	29063	19797	22090	19658	22157	16627	25696	17397	21839	22670
9689	21367	24379	17397	13795	17118	19654	34906	20968	22317	18334	18248	12296	25061	18112	21717	15844
6165	21261	12794	9647	11273	14068	15435	17563	17353	13587	12123	17013	12317	16504	15278	18573	13799
10916	21251	18819	16789	16752	21612	22692	27924	15443	19743	17318	18764	13915	23608	17061	25177	19353
989	21224	25081	17897	12294	23145	17730	40075	22054	25856	18800	25457	12043	28539	16622	34441	14336
506	21191	22157	21982	23169	26551	28521	41628	18617	31882	27431	27595	19639	33274	21999	30138	24198
4134	21166	26086	28538	28150	34129	44016	37729	23034	33379	29328	22626	27247	29077	32640	30514	32787
5999	21114	64351	29324	19950	29023	34647	128419	32455	55608	46180	63700	34636	35948	25549	33816	22004
6181	21014	10635	8221	9162	12250	11633	13325	22197	11385	10630	16157	11747	14074	13445	15444	12693
7035	20997	11467	12867	2215	14610	2921	23777	21617	15871	7566	18063	1569	21210	7830	19062	2184
6232	20781	19392	13136	16239	17355	18694	24655	25313	17415	18360	28449	20734	23101	19773	29398	21961
1728	20750	5528	8450	6271	2971	6354	8571	4436	4538	3455	3116	7076	14865	4416	4882	6303
6207	20629	14039	10155	13413	13175	16760	18215	16455	14209	13976	20120	16236	17162	16663	20974	15593
10099	20508	12249	12010	15754	18913	21310	23510	19489	18641	18246	17986	18318	17621	18069	20272	16744
476	20424	19944	23480	31847	18531	33656	25151	11418	25838	21561	18662	29675	23352	34599	21303	34412
6169	20348	9126	6254	7772	10071	10621	11169	17984	9569	8953	14102	10229	10911	10507	14380	9855
3693	20333	31868	27870	28131	31082	47259	53768	25893	40588	35989	27818	26228	34401	27293	40024	28048
1265	20264	13773	12530	11171	14750	16245	14405	14425	13160	10471	15263	9462	14463	13365	17177	12730
2192	20174	11130	6807	4308	30404	5385	15965	34583	8705	6380	22325	3829	13681	7456	31362	5806
1465	20129	26756	14310	5227	23555	7557	30574	13169	13735	10161	32881	5605	24397	10550	26187	7858
2934	20107	19977	15028	10692	33493	17534	30124	24121	28735	23548	27578	13766	22416	22750	27645	14550
8763	20035	16265	17936	12309	19024	17755	28242	18044	22729	18786	18411	11116	21942	14478	24220	12789
1462	20007	26103	46499	28571	16388	45484	45637	16730	32537	30941	14486	14589	24372	27839	33347	19557
6696	19986	15209	26275	57404	3769	30210	8163	2562	6355	49607	32800	86996	1486	42193	6673	41628
9902	19977	22289	22169	13081	34579	25852	34671	26849	36639	33854	28499	8803	26665	19297	31532	14512
1933	19932	16005	12657	13528	13704	16737	23193	12805	16646	14838	20505	13405	19545	14634	20731	16018
558	19856	20722	25751	12058	37831	18427	43147	25289	44647	29334	22739	7710	29331	12276	32682	12766
498	19680	17380	16284	16414	18278	20606	26308	14699	21025	18010	18017	16209	19843	17685	19921	19216
10970	19664	24525	23243	17068	24862	22885	39093	15281	25185	18577	20306	13489	36983	16384	24001	19538
4854	19664	28309	32502	3833	38137	6976	51884	29213	34122	22074	31955	1901	43298	11179	46470	5207
9588	19603	12851	12777	23792	16942	32065	21270	19032	13727	15204	10708	24550	16706	23302	12851	21798
8870	19561	16428	14038	18160	26181	19968	18890	33585	13923	13843	22706	12548	12594	17891	15710	13657
4638	19527	30082	20980	44866	23073	84446	27057	18246	25421	30067	24486	36386	18426	52810	36071	60024
6158	19515	8874	9082	9358	11421	11348	10631	17725	9403	9002	14016	10685	11520	12875	13711	11722
998	19440	17547	14242	12568	17665	15985	25459	15694	21119	16370	17621	11593	19421	13366	19839	13701
4232	19435	25594	17329	20976	11221	21745	17611	8617	7180	11090	23021	12953	13045	14262	16827	14557
1650	19341	16651	14380	15853	16659	18153	24871	17310	21320	18526	21294	12748	20286	15121	21116	18355
1778	19317	25128	31183	32194	27112	41957	41424	22272	41183	34021	26037	26965	27459	30743	29669	31993
6695	19300	30764	31857	57116	7829	60562	20225	9096	14709	22533	9733	39092	14698	49060	15114	61091
220988	19295	14107	15491	11879	12112	11800	17004	11470	12138	10909	11819	9232	15280	11232	15871	11028
8301	19197	23953	18500	28846	21035	47911	35502	20233	26703	24659	20648	28156	23198	31723	26782	39124
7837	19177	36352	40857	17142	46380	34302	60837	23922	60684	42621	42848	10757	49041	25690	61590	20272
5094	19166	14379	15258	14166	17290	17920	18205	17308	15698	12485	16885	13499	17829	18079	17920	14911
79586	19119	18782	13697	19685	22660	27574	27501	26897	21493	23000	24426	20666	19742	19883	27229	28263
375	19100	16624	13631	11211	19280	16030	26765	21691	21158	16420	17280	10792	22285	13526	20721	13640
64111	19029	2078	4158	7853	607	18166	64	218	149	1870	4125	36565	688	30444	1916	17089
595	18964	21767	32684	30873	48976	78835	67092	29650	47940	57344	20536	35948	41463	38683	27529	32468
2195	18956	28101	42089	38512	30398	66191	52615	15819	62078	41161	27170	32779	38412	42614	38699	38064
7415	18911	19635	18203	19088	18649	25553	31769	13230	21156	18684	17430	17041	23067	16997	20857	20894
182	18860	23523	27344	7626	16848	7368	34286	11323	48229	20907	16449	5497	32112	9281	30581	7046
23499	18833	35484	37410	55078	41207	93159	44168	25418	41988	44819	29871	46858	31154	53592	39633	54262
3488	18801	50028	22750	54562	73504	237729	67460	46136	97423	124845	115076	48944	20116	175840	114118	62534
55754	18744	17500	17354	14598	25408	24898	35278	21920	28787	19413	21338	15765	25754	19768	23517	16181
23603	18726	22672	19855	13484	33874	22046	39998	18178	33068	25856	23218	12826	27520	14113	30420	13884
5879	18690	15519	13312	11345	18035	17461	22487	19124	20533	15068	15656	11568	17743	13781	18723	12800
2202	18624	29743	34366	88221	12933	136763	31320	20327	7134	35685	15203	130885	44220	94724	36455	57429
283131	18581	15279	16899	18253	14520	32226	9597	31900	5918	14852	13597	17963	10564	30483	5323	14779
10092	18520	16503	12580	10069	19981	15297	26086	20339	22029	15785	14086	9324	20184	11050	21285	12097
2782	18505	27082	22122	20763	29029	32451	39066	18617	33142	26083	23317	19687	28857	25582	30930	26053
6142	18441	14835	12372	14130	17215	16963	18337	18414	13291	14136	23280	14762	20791	17295	22227	17442
1004	18396	11637	15257	6338	15247	5819	15340	9166	17248	8767	8628	3208	13630	5764	14538	5319
1264	18376	20574	8138	9521	17017	16724	19955	20172	11488	11088	25390	6394	11997	12803	25625	14390
5037	18371	12505	9945	21962	11220	24854	13248	14667	11531	12654	13162	23658	11101	22920	13180	25760
10694	18237	11949	10968	9227	16015	11761	24543	17336	16125	12988	13479	9319	16077	9363	17896	9835
3799	18231	22808	19468	18991	19998	27283	33745	16639	26984	21353	19326	16628	23800	18719	27021	19132
2771	18202	17579	15257	17471	20833	19827	25697	17199	21212	18223	17672	15280	20841	17084	20828	21015
2670	18190	43720	10182	159215	1925	119019	2306	2115	125	19425	3409	235961	1195	205408	4163	271238
824	18162	22304	23238	17664	26832	31398	37970	23734	23627	24354	19855	14249	33001	23607	23447	22272
2197	18117	7988	5173	6888	7948	7783	9985	15526	7663	7699	10573	7441	9335	7076	10966	9145
9741	18073	19471	18592	17214	26117	26461	31610	18131	25956	22089	23424	17335	29256	20622	27604	17855
7416	18059	12987	11128	10866	17249	15143	23330	21200	15759	12349	15422	12240	15678	13092	12792	12111
79572	18057	18017	12704	6771	7427	10363	15985	9591	14636	9707	11499	6536	18846	9677	16541	7349
93621	17977	15258	14001	15262	19708	20866	22560	15871	18726	14290	16361	15992	18497	16702	19325	17206
4162	17971	22584	16027	19057	26238	31437	38275	16520	31569	27014	30104	11471	18142	21953	39150	20215
2487	17849	6379	11310	18509	2882	16824	3351	4715	570	3478	5678	38733	1213	21093	3433	26069
4154	17846	17782	14275	5505	20161	10196	31488	29719	19553	13178	14709	5194	20171	7223	19492	6483
56889	17808	17376	19196	15996	19581	23729	28551	14749	24290	18388	17396	14341	22099	17588	21812	16888
58505	17754	13344	10901	7885	18689	13653	27977	19152	17810	12972	15323	7035	21098	10302	17929	7378
8560	17694	11283	8863	6510	11087	10205	19563	15282	13041	10898	14508	7272	14450	7391	14227	7157
56901	17651	27295	12724	5197	48779	7454	49259	88562	34994	20440	46585	8649	34782	10153	34166	6535
10159	17639	12952	12344	13372	20009	22776	28043	22005	24964	20467	22173	16712	19267	16513	21194	14963
64065	17423	9885	8759	15155	21466	17175	24317	19908	14973	13302	13955	14446	11942	12957	19713	13080
1295	17310	47246	41978	13514	43471	31978	95543	19169	105402	52929	56247	11015	67215	22814	73084	12105
6281	17157	12155	8422	6990	9359	7514	16634	22228	12493	9353	10937	10415	14540	7493	10166	7196
5327	17154	11914	9082	3876	36336	12637	65952	88414	59598	61722	17461	2426	19767	5815	22733	4536
3312	17136	48707	65005	54558	66509	82616	121457	9386	85149	92313	71737	47339	87264	49440	76337	59676
6156	17125	17155	11634	16323	15472	20380	21886	19580	17355	18055	20536	19142	19656	19857	26356	21505
6184	17098	12824	14066	12232	16510	15771	24313	15390	17998	14803	14541	9292	22062	12387	16851	12130
8655	17043	9178	7942	8361	11159	10718	16298	16601	11619	9691	14244	8707	12872	8317	13479	8073
8099	16973	13021	8235	12931	13349	19591	17822	25094	10617	9779	10779	13714	14283	15333	10641	13855
26986	16867	26165	29404	23638	31017	36785	35672	27183	34941	29584	28381	23939	33711	32703	36208	27225
950	16770	24941	22771	37011	19883	47598	32578	15006	29262	28555	23013	34329	20937	37036	25441	42420
832	16768	12623	11425	10422	16093	13762	18966	17122	14312	11675	15188	9487	16171	10884	15211	11144
23213	16760	53100	39145	20677	23820	16283	56028	17307	9746	12394	21879	20160	37328	29633	24465	18302
5066	16733	26686	21895	19885	43027	35539	57681	33989	52669	35822	33168	19326	34198	26258	35396	22286
5033	16727	28309	23728	13166	24238	19164	46864	16702	38840	21280	24430	10214	42235	19020	25380	11281
5204	16687	9319	6000	7527	12981	10095	16761	22801	10719	9714	13394	9267	12152	8391	14235	9396
1718	16642	13047	30978	31289	26403	39365	15527	7774	13825	21089	11022	23288	13876	13166	19835	21632
3675	16624	22576	28274	37265	28675	53057	34142	14415	35652	44337	21902	31285	24998	32316	28369	44281
6147	16621	14710	13520	13457	17203	16817	20151	14896	16063	14483	21300	16160	18455	17514	21707	16258
30846	16618	17865	21167	6941	30180	11289	30355	24120	26503	18975	23565	5664	26961	10795	29573	8236
6421	16549	9894	9810	7528	5671	8197	10106	5902	7757	6013	9082	6888	10009	7278	9720	8174
7458	16539	15359	13724	12935	16147	16872	20536	14012	15718	11913	15005	12308	17237	14886	16599	14895
4629	16506	19513	6012	1079	11983	2873	26574	13469	10627	5861	24316	833	11279	1599	31728	1719
51400	16451	10942	13782	3723	27682	8480	32673	14780	42370	23127	13609	3216	8820	4332	23580	6865
4240	16418	20723	32359	32273	54664	97992	45215	20735	52547	61376	33568	55627	29657	37617	39452	50613
1974	16399	12870	15551	22530	21425	32210	28110	26977	28559	25745	25567	23220	18340	25261	24983	21047
3572	16384	18401	22694	23196	13147	26215	25567	11165	18454	15882	13127	21996	23345	24418	18983	25101
5935	16239	16695	6859	5740	7660	11439	13398	7508	11406	10264	13643	10070	19285	13833	19300	13966
25873	16227	7745	5900	8012	9317	9992	9306	13859	7953	7660	11658	10002	9469	9001	9939	10726
6235	16216	14329	8249	11081	13027	14365	17712	16241	13285	13338	20368	14585	16315	13304	19821	14496
57333	16131	10125	9750	2920	15421	4912	19326	19623	14829	9688	16335	1532	15352	5519	13399	4265
90411	16046	18999	19766	21163	21711	32845	45416	18728	27309	25836	18191	14990	27174	21566	21838	19757
140609	16023	27374	14466	9238	29710	23788	61981	38592	49625	37421	22492	12916	32284	13558	29940	11705
7532	16022	16720	14928	12585	17753	17234	25468	15475	20827	16204	17079	11742	18859	13699	19271	13759
6741	15942	8788	8032	5948	8385	6990	15785	12291	9786	7707	10749	5311	12349	6158	11940	6027
8829	15863	9222	16858	7249	10621	6708	17986	11958	8349	7594	9164	5298	21276	7981	10763	6803
5339	15828	16729	29487	16844	28124	18129	25065	21122	39373	31293	21308	9828	29583	17413	23193	14072
3015	15789	10519	8705	5709	10074	5920	13023	11243	11093	8393	11104	3991	11686	5045	14090	6114
9260	15718	14823	9402	8422	14977	13921	13871	17608	12552	11309	15823	7761	12779	12089	15875	11177
64710	15715	19169	17924	16486	15617	22868	22307	11757	19633	15451	13967	16403	18993	18391	22566	19088
908	15698	10552	11451	10452	9721	13141	15552	8675	11371	9417	10651	8868	12980	10036	12412	10631
6144	15656	17998	13334	16327	18282	22311	25283	14032	17248	16350	22460	18401	22150	21205	24259	20367
3998	15612	16536	18186	10875	20588	19493	36340	15735	23846	16416	14094	9208	26768	14543	19452	11886
7170	15608	15504	14870	12897	13402	15868	25410	11184	17220	14970	14328	11396	19159	12447	15091	14183
2022	15596	8005	14865	2795	6895	2065	17784	8264	12667	7421	11721	2130	17156	2702	9658	1792
30008	15593	14720	11847	15799	16042	24054	20716	16855	13454	13385	18840	17559	18832	16130	18895	24456
2547	15592	13276	14613	14098	13479	17373	20654	9477	16962	14279	13322	12908	15959	12839	14715	14941
1315	15470	16572	14781	11698	14220	17826	30156	15151	18976	16911	15321	10470	19628	12399	18693	13224
23451	15454	14770	14425	12025	12883	18346	19058	21748	13696	12288	13182	11604	16892	17969	13387	13288
9510	15431	24326	32366	14463	49021	28521	90878	33824	54170	35175	24646	12960	48419	28261	29572	9115
51014	15427	11801	10944	8305	14399	13999	23856	16983	16325	11763	11731	8613	14878	10454	15228	9523
9590	15425	42233	29266	45807	20635	87292	43055	9561	17773	31077	17983	39774	24171	56365	23129	62389
1000	15377	29060	24202	44409	18842	75277	23251	9576	29762	27782	19601	37649	13917	43454	24284	46378
5763	15352	9106	8787	9526	9845	11003	9416	11912	8925	8411	10954	8333	10531	8510	12261	9701
1314	15318	16171	16731	13409	14875	17938	27030	14804	18073	14821	15143	11854	20154	14177	18290	14320
22822	15305	11972	21894	34614	13883	32596	15011	11046	10817	11091	7155	28329	19051	34193	8177	35358
3913	15292	23911	25284	26673	40949	40837	36277	24192	36191	33703	27831	30551	26836	29908	31947	38579
1327	15276	6786	5236	5958	8568	7566	10267	16529	8188	7608	9948	7164	8383	6861	9264	7419
5861	15248	15154	12518	11821	16876	15960	25008	16126	16246	14001	16139	11319	18672	12748	18184	12812
9037	15197	22228	17322	6759	16860	8663	30446	10105	43468	19755	18897	4850	35633	16659	19892	8478
1026	15191	17300	19924	26146	43107	35308	33512	22295	42077	27124	28962	26147	28616	24093	25916	23994
7381	15171	7414	6104	6799	8401	8286	12494	15015	8183	7303	11149	8024	9258	7985	11747	7461
10602	15168	16823	11325	9548	16180	10370	26508	16645	18409	12709	14386	8782	14484	8576	18518	11294
9987	15151	12489	10952	9193	8572	12487	12855	12493	8486	8074	8959	8851	12485	10522	9648	8518
6231	15133	6984	5688	5935	7955	6661	11374	11647	8855	7083	10798	6413	14133	10606	9853	6406
6836	14978	18286	18064	14731	20714	19519	30587	11389	21925	17018	17392	12393	24470	14248	20303	15567
2131	14962	14736	12554	5140	14406	9415	25912	14897	18697	12179	13470	3555	19696	7978	17901	5745
6746	14919	11551	9074	10449	10532	12014	16583	10901	12988	10046	12539	8603	15838	10216	13662	11351
2950	14909	7844	6177	6020	9385	7929	10172	12121	7869	6138	10468	6593	10389	7487	8999	6868
3837	14899	17241	16527	13136	12742	17391	22854	9159	16627	14285	11717	10143	17261	12949	16557	15187
50509	14898	14271	23954	808	16109	623	22866	8726	10584	3867	8161	187	37578	4607	17108	664
3611	14859	13458	10238	8135	17351	11487	22740	14953	18610	14369	15022	7286	15004	8803	15806	9265
9358	14849	11306	9767	1230	14632	3958	44217	31158	30240	20181	10116	1476	19132	3866	19495	3139
4736	14820	16597	13306	16056	15304	18975	20794	13062	13909	14904	22623	17839	19893	16490	26302	19215
3191	14805	8947	8962	7286	7452	8161	10522	8805	7536	6157	8802	6261	9869	6681	10230	7796
7295	14796	6743	4644	4616	6584	5276	11116	13486	7795	6523	9523	4779	9892	5120	9331	4329
7408	14783	10645	6092	5769	7780	6715	11719	12638	8473	7454	9739	4694	8214	5141	9797	6705
829	14746	10651	9747	7089	12052	9003	17197	12453	14364	11435	9262	7051	12966	6475	12387	8296
1827	14744	10221	6559	14047	33937	25386	33563	33561	16407	13701	9496	20692	20523	14607	13046	15521
2014	14721	5893	6066	4218	6820	5395	9998	12912	10192	9155	9384	3866	9175	4376	9092	4162
83604	14716	13759	14553	16164	33945	25668	38870	30631	47199	28621	15673	16045	22482	17388	27036	17714
8721	14704	6518	5549	5914	9065	7501	9366	15149	6770	5911	8426	6862	8604	6667	8052	6930
51065	14693	8837	6169	6593	7392	7547	12117	16613	8326	6433	11659	6969	9118	7180	10085	7139
8826	14646	20850	25632	17980	18926	23485	35602	12076	32571	24010	19844	12974	23362	14721	24959	15240
5806	14646	30646	11930	2584	36461	3622	81943	28213	27146	14282	24718	1590	64926	8869	31878	4093
293	14629	12479	7765	7779	10069	9117	13770	11906	13628	14108	18232	11363	10054	9074	13868	9302
10109	14614	23555	16720	13781	28656	21595	40866	17620	31334	25847	25156	12084	28466	16392	28645	15728
2521	14600	10496	10289	8420	6704	7805	10340	6712	6848	6519	8704	5126	10342	6963	9936	7494
10550	14590	9085	10034	8668	15022	11323	19108	13625	14106	12247	11621	8889	12685	7116	14165	9450
5118	14556	5768	10130	1700	9417	1880	6835	9846	3620	2757	7801	156	16683	4396	12441	1177
372	14501	15571	15282	10992	15805	16508	27050	12534	21756	15707	13357	9509	20956	12884	18146	11914
10581	14486	4735	3522	2111	3216	1241	3855	7846	2263	2029	4470	1566	3955	1886	6408	2426
665	14480	21683	13695	10082	24330	17382	34576	25753	21952	15287	19375	10789	20650	14068	22938	13356
3646	14475	9829	8052	8543	9600	11919	13593	12132	11547	10429	14536	10863	12003	10929	16718	10011
9509	14464	14501	20912	2359	6904	1035	22241	8390	20775	7895	9821	578	18802	3497	14888	2274
6166	14444	6539	4499	4612	7861	6003	9237	11974	6370	5734	9022	4820	7733	4964	8544	4940
2617	14389	18552	16398	9576	24303	17506	30098	18147	26497	20796	16300	7587	24683	12026	24222	10835
7922	14329	14417	14231	13288	17965	18888	23920	12228	17614	13575	14766	10641	21068	12960	17355	14120
7812	14328	25932	27806	27699	30348	43461	40668	14945	41024	33452	23989	23830	31974	33894	36238	29682
57045	14296	10864	9626	13932	10355	18466	14338	13761	13375	11092	9484	14622	9301	8808	12130	22893
6193	14294	12234	9581	11439	11416	12537	16929	10493	12493	13084	18011	12237	14812	11924	17217	14692
114908	14274	15735	12777	15980	14267	23299	21143	10017	17830	12284	12236	12772	15433	16159	15854	17304
3133	14243	9973	10021	8199	17786	10349	23392	16819	28881	20836	17633	9951	15933	10633	18689	11863
26135	14211	14944	15863	13716	15440	17747	22716	10642	18719	14856	14303	11363	19317	13538	20568	14946
2744	14173	15187	15695	11699	24050	22054	23566	22438	18509	13191	13135	9671	22492	14845	16013	9385
23585	14171	8734	7415	5893	8996	8702	12859	12448	11335	8719	10115	4846	10649	6555	11225	5560
6238	14123	11553	14051	9362	15303	11521	21966	17026	14683	14083	14399	6967	18055	8764	14793	9350
10971	14119	18066	16203	17819	18418	21849	23980	10297	16632	12784	13392	15004	19085	18006	17476	18346
6251	14110	9729	9614	11137	9889	14588	16651	12778	12422	10800	12692	8966	10899	9139	12531	9258
5589	14100	9794	10567	10055	11996	14658	14444	10110	13711	11162	12475	9012	14853	12122	12588	12866
5573	14056	15905	15872	14451	21779	22731	31801	15303	22227	17583	16933	14558	22515	16831	24242	14181
4170	14018	18462	28555	27620	19318	23898	25621	14959	25387	20045	19055	20312	19953	22205	20746	16408
8079	14001	9929	7797	7895	10801	9989	15101	15560	9815	8726	10434	7274	12457	8099	10748	8657
11315	14001	9636	7225	9132	9605	10679	13200	12964	10645	8679	11019	10095	10767	10126	11490	11160
5901	13997	13851	12254	10573	14139	12373	23034	10656	17080	14557	15872	9438	18589	9700	17148	11468
7520	13983	13794	15005	13192	12034	15002	21534	10046	15254	12600	11807	9826	16390	12166	17950	14224
2589	13918	18832	15991	27651	32932	40229	31950	21935	26522	18948	18703	26975	26926	27550	36055	30871
6209	13907	6657	5377	6938	6931	7905	7622	11254	6686	6558	10352	8052	8281	8260	9238	9027
4076	13886	14227	15845	14988	12799	19514	20274	9548	15783	13270	12022	12506	16252	15950	15397	14960
22820	13862	10694	11647	8816	13392	12652	16921	12660	13405	10267	11681	8359	14229	9675	13875	9559
1409	13807	918	20709	2815	246	1777	424	72	89	223	2344	14235	1130	3879	2349	2857
7555	13765	10090	7848	8887	10547	12145	13048	8847	11620	9809	11366	9730	11640	9700	12679	9646
23576	13750	10764	8907	7237	20994	15031	23645	16498	20534	15540	12785	8611	13450	10257	15918	10348
1522	13702	10191	8440	8833	16724	11487	19060	15054	22290	22434	16613	12928	14187	9642	14177	10277
6745	13683	12475	13978	9875	11544	14092	23498	9790	16973	13559	12471	8995	18463	11133	16434	11398
5214	13682	18533	11937	6097	18285	7370	27189	15918	20096	12508	23817	5542	19981	8180	19457	8881
57124	13678	10666	12375	2241	15765	3602	24934	19191	15525	13167	13997	1777	14465	2788	15778	3758
2274	13645	19943	7961	4727	17554	7574	29666	27412	12695	10213	21872	4058	17923	7120	26745	5465
1981	13626	19517	25393	20442	23345	27804	32410	10595	27788	23534	19398	16486	25354	19241	22882	20553
4323	13608	24242	25058	17485	22385	26476	30648	9915	22468	21260	31052	11003	34173	27554	28863	18669
6709	13553	17317	25223	22938	19471	29670	28557	13946	29228	25321	21048	19452	23194	21529	24953	23643
9528	13530	14519	12252	16817	18886	25310	26744	16879	25079	19976	16664	16505	21179	19960	20802	19209
125144	13503	17091	12044	15571	13133	18796	18289	13496	13565	12679	16871	14849	18081	17467	19073	18599
8992	13461	8738	7138	9866	10688	12731	15539	16214	14377	13875	16694	10636	11098	9591	14383	10202
64855	13414	20717	20327	21402	25730	35421	31775	17550	28467	30884	25295	18363	25420	22410	25284	22533
84168	13406	17917	14055	10725	16285	27873	27241	11670	22981	17461	18478	14120	20460	16619	35331	13220
6418	13397	12826	12706	11897	11147	15042	14544	8465	12579	10978	11673	10463	12738	11807	14565	12724
7203	13385	10375	11027	11474	8982	12734	17445	9594	11462	10949	12402	9881	13018	9422	12715	11943
396	13320	12423	10525	7982	15688	11521	16537	12971	16936	12365	12866	7560	15377	10178	13747	10381
10972	13307	15438	16765	19215	18668	28641	28056	11833	24638	19755	16187	19615	22022	22174	20835	22577
7317	13270	15295	15667	16306	16161	19943	26467	10959	22631	18556	13989	15477	16869	15391	15945	17028
54587	13218	10543	14784	13184	14305	13993	15830	14485	8851	7273	11782	9929	15795	10404	13834	15143
7879	13188	11242	11684	13031	14293	17123	17891	14443	16527	15204	14464	12941	13796	14867	15857	13832
1471	13138	7151	6184	8192	8678	10279	10354	17870	9410	9496	9272	9262	10642	10018	10226	10099
5862	13136	10770	10160	7453	12922	12384	18206	13343	12534	9926	11285	7956	15817	10100	16493	9482
2632	13093	10398	8912	4738	16645	6697	26197	18729	15381	8369	14403	4552	19678	6549	15442	5885
2280	13040	9619	8165	8241	11872	11272	16127	13330	12142	9166	10752	8423	13006	8805	11638	8557
1654	13029	22002	16299	12467	16776	19835	34365	11376	32368	22754	19832	17819	20500	17153	21438	14519
664	13010	17458	9036	6040	24507	12088	38054	29256	18846	12289	25254	10077	21739	11239	17567	10321
6428	12991	11527	9893	8538	9139	9749	14229	8702	9782	8222	9023	8006	11958	8402	11255	9448
10787	12976	15934	14599	14203	15261	23208	25174	13458	24615	18910	13108	12064	17143	18016	19382	15362
4725	12943	5863	3390	3851	5852	4361	7308	10192	6090	5644	5389	3736	4378	3369	5814	4121
9782	12862	16341	16944	17186	14639	21220	21473	8840	17002	14621	14466	14485	17761	17006	19561	18192
347902	12855	17558	13063	15018	18816	34833	28207	16566	37644	37924	18298	15423	12502	16245	16329	14306
152137	12838	10928	8989	4905	16142	8590	18791	12652	15148	9842	10564	4892	17621	7132	13311	5942
3485	12833	11844	3452	5669	16531	21933	34868	28069	11923	15745	17708	12446	5751	6661	23357	10187
1936	12830	7802	7273	7139	8785	9197	10333	8931	8046	7278	11712	7443	10615	8633	10889	8790
6647	12829	6402	6154	8027	6955	9994	9719	11693	7442	6344	7246	9261	7876	8213	7631	8880
509	12799	8306	5670	5379	8414	7175	11936	12156	9264	8058	8523	5735	8606	5793	9869	6323
389136	12601	18204	12015	3854	18146	10163	26302	15412	13932	7811	14130	5504	17627	5452	21218	5357
1509	12596	13792	20303	32671	18888	44495	23817	11020	29219	40144	38371	40725	23244	40793	25336	34430
54741	12594	8772	9166	7113	12911	10531	17081	10587	15207	12390	10756	6861	12768	7784	16414	8755
23129	12594	18503	17548	15651	15338	20290	19364	11212	30190	25961	19738	10922	14623	16153	21420	20102
10492	12581	11614	10952	8237	9521	10650	15848	8234	10984	8593	9717	7254	12685	8222	11781	8830
10549	12566	11434	7996	8279	14482	12130	19604	12130	16582	13063	16111	9304	16628	10291	14784	9778
1009	12455	20548	19727	11716	15576	18749	31923	9853	23623	18878	16639	7722	25241	15741	23046	13897
23646	12454	11642	11054	20844	12583	28190	11232	10108	10475	15488	19522	24088	11862	23558	16176	26750
3184	12446	7577	7253	5296	6654	5751	8549	7915	6239	5017	6889	4747	7878	5573	8347	5917
7803	12431	12037	13449	8815	15532	12143	20188	15131	15461	9836	14620	6974	15464	13638	16773	7826
5692	12417	6093	5086	5768	7447	7696	9107	11443	6864	5938	8194	6042	7768	6721	7753	6792
3182	12403	7009	5879	3872	5141	5107	8693	7404	6358	4784	7413	3433	7962	4501	7739	4242
3925	12348	6439	6331	4510	6330	4559	7850	5993	6466	4270	6241	2303	6546	3584	8785	5282
2130	12333	8262	7489	6788	6286	7506	8688	6359	6234	5909	7648	6798	8593	6658	7458	7662
7763	12293	10148	9736	8489	12222	11227	14607	16392	10907	9570	9604	8687	12527	10475	13277	8240
6387	12283	7506	15096	4033	4677	5799	8051	3284	20128	14436	4709	688	17631	6291	5895	3085
64175	12275	9662	9994	4590	12206	6608	18553	12889	13829	9051	11201	2549	16163	6346	11395	4599
51421	12265	14046	14314	11465	15274	14647	20524	12650	17525	12897	14160	12504	18345	9485	22594	12108
10763	12224	19048	10414	39109	12204	45548	29486	9078	24250	25525	8287	24604	7825	51926	13315	51756
11015	12209	7429	5748	3736	9870	7487	14089	14572	8018	7356	8250	3186	10832	5317	9196	4303
10521	12203	13461	14706	13920	13111	21188	14945	17506	12510	12387	12602	15720	14050	23545	12013	15020
10945	12203	7485	8622	7299	10734	10562	11935	11682	9528	7528	9003	6914	11083	8171	9484	8706
488	12203	14492	18111	12527	13767	17152	24411	10217	20171	15496	13618	10140	20188	14267	19186	12298
3916	12174	15664	20282	20123	25152	32598	25744	10416	31986	27769	24460	15702	23824	22660	25410	22434
7529	12164	13154	13331	11095	16863	17531	22535	13164	19250	15546	13873	11275	18451	12690	19154	12633
493	12147	18049	16489	21649	17101	22763	34638	16805	24147	16284	11829	18814	19879	23831	16506	23304
54205	12142	8606	7670	6873	9527	8229	15137	11468	10084	9006	9207	6177	11182	7173	10639	6984
11337	12134	8137	7913	8443	10867	10093	10755	12935	9040	8092	12462	8958	9856	10576	13295	9204
5217	12121	13780	9753	12346	12661	15794	19179	10907	13065	11526	12032	13013	17582	16353	16733	16164
93145	12086	3925	6439	1896	6994	2125	5961	5688	1595	468	3732	2070	14415	4925	4540	1814
4677	12057	10240	11474	10153	11824	15721	17637	12353	15184	13132	10766	8716	13201	10232	15515	10988
55742	12043	14880	14440	10826	17212	20304	22433	12074	22385	15627	13415	9632	16135	14593	20001	11931
10424	12020	14411	10539	18087	16459	28227	16944	15405	12083	13980	13686	21532	14252	20294	16175	18752
51142	11999	10321	7071	8689	11182	10065	14847	13257	10985	9877	13099	8584	11750	8863	12002	10435
378938	11987	13105	13604	19550	9407	20553	9011	29454	7501	8947	12636	21519	10773	33411	4808	12730
7905	11986	6763	8062	6674	10792	10225	14917	12457	13380	10601	10943	6587	12144	7417	10870	6658
4313	11956	14806	16848	4201	22706	10715	19539	14294	10588	9810	22712	1459	24674	14443	19903	4607
8766	11954	11061	7274	14485	10523	16471	14501	12687	9423	9714	9344	16136	10026	17022	10144	16214
10959	11905	17457	16186	12386	18790	18550	28921	11068	20420	16367	14512	10740	26268	14134	21729	14058
9276	11905	15182	14428	12730	15695	17101	28440	12482	18246	14009	12324	10933	20061	12885	17250	13877
6726	11876	14687	12012	16218	13218	20803	17770	8851	13609	12248	12998	17451	13813	17287	15647	18709
6711	11824	20207	25143	18158	30383	30845	38779	17819	45654	39977	22338	20273	24981	18897	30202	21471
10491	11787	10117	12164	10184	10197	14648	16436	9041	17948	15944	12384	11115	15343	11821	13733	10191
2734	11780	19298	19801	15125	17846	18191	26066	11882	25902	20258	19442	11654	20163	17122	23173	15463
2059	11731	11138	14059	5302	12475	7855	22640	9150	15765	9716	12974	4676	25377	6272	17732	5384
60559	11719	9881	10239	7280	35099	15189	35519	25811	25659	20479	16779	7236	19244	10124	22361	8230
5396	11694	10899	12752	1938	7594	3650	15015	8382	9906	6393	10839	348	13905	3483	12170	1549
3843	11682	14363	15864	11627	13791	14326	22636	9479	21448	13750	11957	11379	18650	11991	17524	14325
10956	11671	15813	16426	21472	22362	31498	26031	13404	24160	24223	20443	19307	25881	23017	26890	25316
3678	11662	17114	21753	9204	21142	10876	41361	22065	27814	20016	22263	4481	29321	11708	21937	8993
5756	11626	10386	8903	7211	11160	10172	17337	10505	11782	8989	9411	6528	12718	7950	11950	8025
3313	11587	12197	12967	11325	12317	15404	18015	10087	16026	15697	12592	10145	15217	12372	16245	11511
10342	11580	9298	7830	8832	10595	12905	15162	13384	8914	7693	8043	8336	10940	10605	10075	10519
84159	11576	12094	10674	9756	12613	15949	13960	8916	12691	8363	11242	11967	11837	9585	15652	11696
831	11563	12978	10459	14161	13077	16673	15023	9324	12594	12933	8494	11646	10548	11941	12565	14223
91663	11557	8830	13055	6710	16081	7521	21748	15679	14601	10365	10378	4406	15026	6373	10964	5328
6431	11555	9632	10836	10593	7686	13096	10682	9694	6643	7146	9496	9449	11641	11950	8635	9933
9871	11546	13550	12628	6872	13509	10470	24976	12803	16775	10738	11556	5117	18564	8712	15543	6971
2896	11493	10689	14418	15793	17148	18670	14601	10638	19444	20469	19260	11972	15205	14444	20335	17374
6513	11480	18122	15377	22148	18803	32515	31257	17574	23500	21645	22809	21593	19880	25228	24505	30646
9123	11467	11864	8693	5445	20715	7346	25022	18799	19721	14341	20311	4735	16175	6447	15086	8456
4841	11459	14046	15584	13484	14693	15892	20097	8585	16180	13459	13508	9774	17123	14096	19060	14614
55379	11444	10990	10346	6906	10560	9380	17694	8755	11584	8521	9051	5845	14243	7252	10261	7534
9890	11442	8574	10668	842	6550	633	14527	3591	7114	1920	9662	661	18428	1289	13890	738
23164	11433	16739	15336	9258	18027	13557	26393	13585	21198	15188	16123	7378	18905	12163	21386	11560
22948	11421	8339	9990	8165	8938	9965	16202	8960	12949	10312	10878	6555	13410	7225	12602	8183
8933	11403	7458	5825	5415	11638	7623	11286	15264	8361	6740	9765	6157	9549	7762	9685	7498
56005	11373	8301	7301	7343	11107	8419	13675	10138	13807	10829	9589	6022	13728	7963	9691	9025
4697	11372	7344	5291	7819	7172	10004	11699	8995	8084	7290	8565	9263	9672	7512	7964	8722
1153	11369	11937	6067	8184	7238	13475	7679	10748	5860	6203	8952	11073	10013	15445	9381	13433
10484	11346	16197	14084	6979	16250	10601	29553	12101	19660	13083	14712	5561	19906	9077	18803	8042
9669	11335	6282	6359	6834	5676	8936	10632	10482	7341	6427	6909	6132	7539	6557	7597	6151
55970	11324	18248	16884	12917	15369	22962	29148	11862	19102	14851	13731	13804	22507	14599	19634	13657
4779	11308	17515	18778	20824	21790	28612	27834	11623	24562	23117	17420	16025	22241	20942	22923	23124
7086	11295	8720	9911	15116	6046	20340	6941	4635	4987	7747	6030	17090	7415	13664	5575	20300
6897	11263	9577	11017	9772	10420	11943	18435	11611	15956	12369	11154	8157	13648	9130	14752	10187
10476	11243	3951	3509	3348	5306	4198	6960	10817	5515	4669	6115	3834	5830	3587	6269	3665
6426	11236	9109	9632	7189	6589	9111	12811	7502	8641	6962	6845	6322	10807	7555	9177	7500
3150	11234	7713	7410	8033	7784	9116	10454	8607	8271	5752	7419	7460	9194	7934	8285	8148
7323	11217	11522	10918	9943	12406	13312	16686	10632	13092	10661	11709	9269	13802	11798	13144	10795
3308	11209	8763	9065	6875	10469	8576	17404	9274	13983	10527	9355	5869	10132	6766	10092	7327
114990	11203	6919	6614	3610	8150	3979	11583	9771	9389	5573	11209	3082	9988	3209	10318	4005
1893	11188	6271	4555	1288	11601	3517	12751	12869	9223	7843	9643	759	10201	3599	11473	1213
3672	11171	19880	17213	8190	10588	19156	25187	9122	15399	12042	13861	4981	16062	10798	26069	9434
1975	11166	14134	15655	14663	13748	19272	16723	8694	16079	13837	17079	14355	17238	19171	23375	19011
166	11149	11356	8284	7695	17034	11475	16905	18888	12862	12223	13942	6907	11602	9011	16372	10304
518	11140	7087	4937	5550	7400	6723	11911	10709	7362	6710	8268	5823	7962	5229	8099	6384
55858	11139	9226	7392	6396	9268	9163	16367	10610	11817	10098	9644	6254	12208	7276	10973	7601
4837	11139	5658	5043	1143	5201	3999	4264	3685	5210	5684	6440	1087	5473	2476	7499	1374
6748	11134	4979	4175	7407	7134	9337	8628	12517	8218	7583	9105	8937	7106	7583	7926	8930
1337	11129	5377	3823	5733	6124	6493	7558	11481	6270	6055	6955	6146	6979	5543	7186	6655
5500	11085	11065	9656	8699	12257	9912	13684	13579	10659	8495	10468	7540	10076	10639	12812	11067
6227	11068	7610	4629	6856	6935	7431	9190	12132	6440	6656	11170	7525	8581	7143	9699	8692
6464	11064	12709	12981	12224	12192	17139	18542	13866	14755	14571	12171	11840	14368	13037	12959	13037
5518	11058	10594	10513	12212	13406	14861	15082	9714	13484	11160	12507	11134	11312	11310	11695	13826
51371	11044	6846	5640	4262	7994	6471	13955	12760	9605	7593	8601	5097	8496	5741	8438	5085
2665	11034	12367	11516	9700	12739	13006	20165	8461	14360	12176	12826	9498	15746	10722	15765	11263
4942	11026	9093	7334	6841	9019	8624	15771	9529	10526	9126	9780	6856	11545	6966	10363	6960
165	11013	18988	23450	6107	23152	11242	20249	19104	12295	17034	31037	2220	21879	13091	25592	4913
10395	11000	14999	13764	2584	14176	4959	22242	12719	20820	11125	13022	2479	16158	6288	15466	2915
7070	10982	4912	6212	2146	9325	5013	16960	6667	8811	5127	5829	2393	7115	4738	10383	5602
9448	10951	14353	17625	14834	14934	19878	18253	9874	16640	13167	11894	10170	15342	19288	16569	15618
81631	10946	9435	7938	7426	16447	11954	15338	15085	15055	12220	13078	8338	11289	8526	12401	6992
5069	10944	14269	12724	3997	29960	18167	32165	16093	22007	16349	11647	2983	12528	9905	17920	5398
10728	10925	11371	11585	8373	12614	11834	18198	9467	14315	9882	10772	7899	15046	9856	12561	8843
54928	10923	10611	9041	6583	12296	11255	20451	11933	15167	10029	9162	7314	14349	9107	13889	8398
29956	10852	6313	7497	7745	7568	10447	10853	9195	10091	7907	8454	7935	8571	8290	8919	8303
2615	10851	9577	12568	1301	8239	1267	19540	6862	15346	10227	17545	850	14384	3151	15815	1193
1340	10833	4326	2954	3949	5186	4675	6147	10597	5051	4593	6470	4679	5205	4341	6222	4327
80762	10822	9038	9560	13215	10434	17089	14070	8047	12035	10692	10023	14431	11550	16453	12888	14275
493869	10802	11106	12015	6193	14323	11169	22405	11951	19400	14417	13454	5367	18837	7379	18381	6692
47	10792	12952	14217	12473	15458	17289	23026	10111	17326	17602	16189	8573	20348	13345	21496	11846
10155	10783	7655	8968	7188	8697	8590	10291	7252	8711	6408	8763	5828	10181	7307	9086	7981
4694	10775	4581	2724	4039	5139	4697	7142	11917	5551	4900	6179	5253	5137	4155	5897	4720
4026	10774	17910	14031	6379	11106	9038	22099	9380	20775	11413	14745	4838	15212	7762	17343	8093
2673	10772	11256	10039	5670	16706	11688	23682	13979	16045	11325	9947	5589	14641	7352	14712	6590
11171	10736	9792	8440	7892	11612	11782	16292	9571	11309	8893	8990	7085	13775	9572	11311	8636
7417	10733	7917	8204	9067	10652	12964	13339	10101	11434	9358	9956	9139	9881	11340	8957	8929
10577	10730	4875	5338	8931	6169	10631	6409	7912	8924	10940	10662	11697	5096	8962	8235	9232
22801	10704	24856	31326	9732	29864	42407	50387	12814	49179	31879	37981	8516	35443	20550	51066	15251
26994	10701	11452	9720	9570	18463	17913	21019	14560	20350	15075	14783	10056	13795	11407	17106	10863
390	10699	9314	12303	5945	18510	5780	25874	22895	20862	12378	9611	4718	16244	6773	17063	7063
56241	10692	1225	3223	216	1748	141	4759	3620	1869	1004	3045	410	3270	637	2050	222
100128731	10680	9284	5420	6746	9872	8544	13489	16329	9448	9006	11756	7439	10634	7450	11779	8237
4907	10666	12038	10382	6229	22199	8454	42063	19971	21749	16569	6210	2998	18483	4848	13300	5627
23478	10644	7815	6370	6049	7426	7030	10598	7891	8534	6432	9090	5847	9515	6139	10430	6844
4641	10642	12561	13686	9307	19098	16383	22391	13136	23277	17263	14114	8288	18197	10637	18412	12074
51727	10630	11866	9585	7612	15307	13765	18713	11773	14407	11260	11524	8440	13012	9232	13522	8751
5515	10621	8106	6554	7004	8031	9075	11714	8716	7784	6601	7500	7013	8935	6885	8829	8172
91624	10606	7414	6576	2203	9712	3866	14106	6861	11051	8474	8750	1460	9148	2962	11201	2219
517	10591	4809	4598	4971	5768	6134	6204	7631	5850	4894	6536	5344	6836	6317	6950	5559
10480	10585	5454	4850	3724	6668	5157	9144	8052	6528	5523	6941	3956	6891	4215	7988	4396
8668	10564	6491	6034	5896	7723	7087	9294	8867	7929	6534	7738	5398	8044	6139	8180	6251
5036	10560	5704	5167	4725	5081	5805	8132	5389	6396	5633	6069	4166	7499	4484	6940	5135
81618	10557	12603	8043	9043	21965	14289	18403	17397	13146	12923	13721	8006	10715	10550	21372	14687
1350	10523	6954	4631	6379	8359	7947	10134	12144	7856	7115	10100	7839	7766	7253	9963	8083
7533	10517	9168	6624	3874	10853	5552	13730	11179	11823	8469	10049	4034	8886	4789	10750	4019
25824	10513	8550	5742	6377	11198	8112	11443	12731	9620	9062	10901	5752	10065	6337	12871	7784
6396	10508	8644	6441	5498	8508	7084	12453	10249	7680	6505	8888	4967	10368	5633	9517	6415
3703	10495	10434	14425	9777	12440	12654	19053	7348	16448	11304	12196	7175	18142	9898	14555	10157
5781	10478	11959	11794	13110	12696	23304	18530	8184	16826	13932	9337	13906	13972	16147	14545	15384
5725	10474	9447	9971	6926	7439	9107	10596	8201	9919	7277	8313	5915	11005	8183	10409	8489
171024	10472	26223	8796	1001	23218	3990	28352	17332	23348	15860	21783	1088	13397	5691	31576	2920
647979	10467	26219	22622	26235	23673	47606	31640	11308	30204	25778	16308	25226	27450	35131	30379	35591
113201	10447	10777	10081	9860	14214	16571	19717	13004	12894	11049	9372	10614	13716	12028	12830	11104
7296	10438	12869	11101	12017	5646	21502	11840	4009	10916	12502	6547	17491	16913	12235	10111	13647
112464	10434	4861	2886	536	3563	741	4659	7164	2947	1968	2747	101	4796	641	4302	581
7095	10428	8292	8706	9066	10282	12572	15310	10995	10937	10043	8199	9753	11474	10070	11462	9477
2040	10419	7001	9046	2172	14701	3659	17309	10394	22903	12459	21355	3105	11010	2965	23204	3873
10160	10413	9731	7244	3013	11024	5143	12553	9131	15551	10940	12005	3590	10148	4990	13567	3608
4190	10382	6417	6212	6933	8485	8501	12638	10311	8827	8349	9680	6262	8275	6377	10934	7266
5270	10371	23498	9963	6147	10584	19301	29095	38498	22933	23729	14817	4120	20232	26087	22936	6640
6185	10369	20368	21021	27934	22041	43382	36046	10669	30936	28828	16529	22221	28891	29482	24277	30701
3399	10361	7212	6777	4077	4103	2690	6327	7406	4884	3052	6686	1958	6539	3178	7461	3257
9550	10359	6944	4684	6744	7611	8425	9604	10541	6994	6855	7997	6417	6730	6760	10575	6804
4811	10302	17674	19097	5186	17290	10717	29918	15951	37237	26652	18687	2667	21501	10798	30789	5562
51669	10297	12143	12449	15413	19516	23858	24146	12477	22682	20541	15213	13864	18567	18883	18998	14553
25994	10288	8712	6178	8284	8823	10813	14803	10310	9120	8267	8687	11111	9470	9004	9961	9938
6272	10285	11746	10351	10836	16148	21765	18660	10549	25519	21879	12871	9053	8483	12472	17106	12855
10657	10274	7294	7044	5104	5917	5547	9277	6249	6190	4369	6577	4974	8133	5777	7869	5201
8724	10269	9226	7936	9183	9764	10769	15581	13087	10353	9463	11687	9315	10038	9236	10840	9840
51596	10261	4674	4449	5169	5989	5869	6823	8842	6345	5749	7121	5295	5827	4925	6530	5889
6451	10261	9593	6887	5975	13438	9423	15634	14577	11927	8866	10560	7040	11941	8696	17032	7194
10015	10254	9472	9163	7855	11449	12246	14883	9856	14333	12034	9797	7673	11813	10366	11239	8489
10512	10241	11251	11685	20748	8939	22791	18278	11484	13461	10689	6631	20793	14909	17504	12536	16333
9019	10235	9293	11178	9074	14301	11996	17812	10754	11857	9855	9575	7478	12497	8079	12790	9347
6234	10234	5432	4458	5609	5952	6188	6980	10455	5491	5826	9782	5971	7586	6855	9284	7327
23326	10231	12183	12111	12625	10865	18429	14585	7715	13915	11145	9989	11426	12231	14416	13209	14665
5887	10224	13210	12371	8771	16339	13445	18632	10226	15403	11309	10384	7258	16341	10478	15646	9844
59286	10219	5317	3216	4811	5005	5708	6988	12087	4636	4899	7274	5962	5470	5000	6438	6188
79001	10210	9606	6026	8208	13691	11188	16846	17352	13688	11295	16009	8636	13063	8815	12944	10561
27044	10205	10628	11403	9003	13571	12979	18544	9275	14586	11353	10885	8432	13965	9794	13571	10641
51119	10197	7806	6747	6986	8892	10789	13645	9405	12989	10538	10590	7607	9527	8052	11471	7632
7145	10188	25517	15245	5805	18811	10849	35746	18003	33870	23141	20038	3429	19636	15701	27754	8531
6386	10186	8477	8690	7466	12501	9323	17732	12002	13220	10354	9636	6376	12496	8464	13184	7463
51726	10183	5821	6244	5908	7182	6788	12397	9370	8778	7141	6851	4729	8737	5008	8753	5280
253827	10181	14174	10313	9910	12019	17539	20311	9280	15142	11563	10833	10290	16065	11797	15646	12008
8073	10168	12839	9662	8532	9976	11486	15369	9630	10977	9153	9935	8615	12697	10165	12484	10526
10567	10118	5123	4173	4433	7974	6335	8869	11659	6707	6114	7475	3937	8289	5080	7752	6068
23204	10100	7780	9147	9006	5830	9436	10220	5700	8626	7051	7075	7144	8188	7406	9608	9111
1611	10080	16803	13026	12225	21378	22406	20848	13406	19068	16704	14274	12907	14066	14612	23376	15458
2017	10063	11175	11850	11329	14855	15700	16860	13461	13129	13071	11373	10978	13810	12835	12845	12932
121457	10037	6128	7178	3404	8360	5725	13164	9728	8550	5959	6843	2154	11318	4266	6319	2956
9961	10030	6936	7513	7100	9859	7407	11673	9487	9662	8549	9643	5415	10689	5948	8195	7210
808	10027	9989	11159	9220	15378	10023	16841	9368	13628	9941	10917	8431	15346	9431	12744	9255
10134	10012	6059	7460	9318	11512	13017	12505	10769	13640	11437	9776	9624	9452	9089	8602	9456
51582	10010	11337	10238	12714	10023	23849	15009	7431	14297	12541	9008	14300	10444	12869	11545	15370
5689	9994	6757	4876	5175	6997	6496	9620	9465	6399	5757	6777	5068	7794	5616	7177	5651
4282	9990	8025	4401	5086	9701	5643	8737	16617	7678	6778	11132	4826	8427	5932	8627	7183
81671	9989	7268	6378	5606	8590	8576	11106	13144	8587	8436	9255	5627	7873	7318	7802	6092
90488	9986	12160	11252	7579	12560	11590	18431	10705	11964	8879	10016	6077	15916	8787	12641	7414
4729	9969	3785	2785	2341	5239	2989	7276	12870	4304	3090	4449	2886	4789	2802	4831	2876
54751	9940	12077	7360	6303	8542	8832	12607	8342	7102	5403	18001	5932	8580	6634	15149	7949
6500	9933	13903	12518	19072	16546	25067	22655	9987	16868	14724	12515	22150	16071	21513	15714	20960
54940	9931	6249	5794	7062	7569	11064	11633	9004	8184	7886	6721	7674	8602	7899	8239	8128
5641	9925	10522	8801	6151	11522	7783	16531	6669	14012	11779	11129	5869	12755	5096	12802	7212
7991	9885	8023	7396	6525	11398	9453	14675	9834	11017	9030	8710	6085	11132	6439	10623	7543
10049	9844	10481	8476	6927	11380	10223	15078	9836	12403	9562	11062	6180	9499	7651	11829	7333
3987	9837	11281	9957	10868	11904	15204	17728	9836	15062	13211	13384	9095	10065	11443	12507	10852
10284	9800	4723	4039	4974	5469	6579	7440	9334	5010	4678	5688	6214	5757	5303	5988	5706
4193	9791	8792	8210	8624	10839	11711	11786	9906	10842	8127	8395	9006	10374	9798	8434	9652
9804	9779	9457	7864	6866	9897	11024	13631	7747	11801	9665	10723	8532	11672	10175	13137	9043
26136	9772	11651	6758	5552	8106	9341	11996	9395	7378	6805	7425	5644	6867	6145	11535	6905
6734	9742	7388	9040	7622	11363	11631	15017	9114	13390	9841	7800	6688	12862	8546	11284	8032
6347	9729	7381	4179	8754	4032	20623	4704	10418	1628	5317	4195	17567	5796	10977	3381	11883
10952	9693	5374	2959	3083	4424	3696	6996	9835	4405	3690	5506	3167	5586	3117	5555	3717
8815	9674	4386	3940	4292	3236	4415	5414	6424	4832	3932	4893	3922	5177	3924	5042	3990
4060	9669	13131	14852	6610	13841	9629	70750	27582	33470	23136	18005	3349	17951	7006	25884	5210
10536	9668	6264	4912	4408	9407	6871	9854	11655	7131	6962	9110	3947	9496	4643	8252	4970
7345	9659	10534	5637	9327	6320	14037	18580	12443	7869	7904	7427	5671	17356	12908	7983	8078
11343	9640	9396	7458	5303	21441	12436	24089	21486	23671	20024	19166	7801	14238	8996	23671	5578
10574	9640	9299	9055	9108	9753	10393	15525	7030	12289	10050	10086	7679	11254	8032	11385	9176
5311	9639	14223	9588	4473	18611	11128	25613	10389	24695	15857	13361	5288	15943	7484	19445	5640
1293	9616	42196	31571	8168	9022	7248	48598	9016	30953	17013	46726	2261	69930	32108	46681	7636
9697	9615	13209	19238	14682	15184	22981	25660	10498	21865	15136	14042	9038	19528	18289	18193	12894
3920	9614	12399	12328	18089	14161	31807	20203	10954	19892	20654	16867	19745	14691	23557	18110	19920
2752	9610	7555	9072	25245	3587	21478	4425	3643	3495	9148	8090	41478	3511	30534	4920	23918
10923	9582	7832	6080	7267	7035	10294	11004	8482	7102	6871	7533	7761	8985	7147	9022	7647
6427	9571	6962	6000	4032	5205	6373	8132	6814	5213	4739	5942	4842	7630	6377	5738	5286
1345	9548	4618	2889	3767	5056	4993	6631	10091	5285	4335	5445	4363	4700	4684	5463	4145
10632	9541	5111	3501	4685	5542	5350	7703	8738	5615	4763	6992	5057	5909	4582	6941	5360
118	9535	13420	14609	15402	11800	18846	16910	6994	15514	13365	10427	14503	13799	17914	13743	18579
128	9524	9964	8258	7197	10209	9207	13545	8834	9259	8453	10387	5845	11035	7690	12751	7468
7358	9521	9676	8387	2206	8573	2699	13731	5511	9192	5008	6838	1631	11375	3061	8384	2294
10236	9508	8817	7791	6867	5476	8598	9680	4288	7273	5669	6250	6151	8439	6709	8264	8335
10944	9504	9596	8983	8347	10270	10983	13935	9740	11547	9612	9619	8172	10491	8802	12496	9793
5355	9500	4655	5063	5517	6434	8540	7679	7605	8664	7196	7385	4646	6533	6250	6622	5126
284361	9484	9267	6467	12764	8064	17442	11468	9139	10502	11214	8495	12160	9653	13305	11655	18226
311	9445	7556	7468	6131	7487	6140	10285	8199	8380	6816	8596	6572	9115	5841	9104	7197
64764	9400	10998	9673	5987	10113	11187	17511	9198	9804	5625	7570	4797	14890	9011	14536	5947
27063	9357	13394	8060	4864	34969	24899	49504	29096	70574	82021	48938	6465	16787	11007	29918	10117
80303	9352	6158	5200	1042	11696	2632	12004	11312	12605	6613	7413	861	8163	1401	12376	1590
1603	9351	7638	5910	5968	10714	7683	13531	8630	9602	8395	12992	6891	10427	6455	12129	6825
79642	9335	9297	10712	9508	14389	12474	18433	8510	16103	9573	9075	12016	14656	7680	15215	9624
3838	9334	5874	7038	4101	4407	4988	8666	4163	6413	4690	5376	2835	7249	3594	6440	4015
51637	9303	6207	4547	4861	6474	6071	8209	10043	6143	5122	7014	4841	6319	5178	7724	5271
375790	9298	15957	17233	28710	16048	37754	13233	7950	20067	25393	16187	25476	14979	27141	17018	37603
5908	9294	12669	9950	9029	13071	13499	20615	9457	17054	13905	11667	8105	16758	9773	15594	10065
3159	9290	9009	9665	4434	8566	5562	17986	6227	8729	5797	11140	3648	13996	5768	8356	6019
3609	9287	8875	9912	7417	7490	9441	10087	6434	8720	7388	8042	6184	10167	8773	9083	8457
4925	9276	6635	4683	6200	5231	8924	8705	8631	6113	5575	5347	6631	6165	6054	6637	6925
4130	9274	11010	12243	13071	12101	17991	18644	9313	16121	15559	8123	7945	13715	12068	11788	13449
483	9265	5520	6236	4674	7413	6022	12869	8805	13527	10189	10617	4619	8607	5492	9416	4081
23654	9264	13758	16932	16196	17025	19570	21594	11869	18617	17277	17813	13287	18378	16906	15477	18701
6605	9262	6469	5986	6238	5196	7484	7393	5180	5238	4705	5131	5996	7143	6698	6421	6671
81502	9260	6277	8911	9501	11229	11439	13458	9987	10703	8737	9595	7965	11598	8429	8881	8754
2079	9253	5123	3467	4089	3879	4593	6563	6767	4353	3747	5050	4089	5423	3893	5713	4663
8887	9221	10690	9588	9078	12154	13111	19729	9986	14236	11533	10677	8719	11277	10227	14684	10779
3185	9187	7870	6903	6327	5709	7112	7731	4428	7854	6321	7684	5664	7966	6477	8772	7574
8974	9182	12312	8272	8787	13313	11756	23170	12332	17154	11740	12911	6182	14909	11223	12846	8354
196	9180	13364	12663	5724	17910	11417	23963	18432	20753	14854	11357	6200	17343	6152	20371	6751
1653	9179	7683	7867	6737	7930	8863	13030	6799	7467	6551	7781	6070	8739	6025	10595	7466
5476	9171	7725	9651	11750	8863	15612	10906	7914	10906	12934	12841	11604	10826	12952	12733	13507
667	9165	16391	21492	34975	16369	52010	21439	10987	20849	21742	11571	29782	15952	31164	14782	34547
90993	9165	6320	8341	2669	5184	4062	8846	8925	7099	5300	6862	857	10161	3761	8029	2473
5764	9161	3391	5142	13925	2388	16928	1861	3548	3082	7372	2310	20388	2057	20424	3000	15902
4924	9146	9628	11758	13196	16557	21790	17159	10719	16675	15254	11970	14537	15284	15710	15108	18648
51714	9141	9329	7221	10269	12324	16018	17648	8835	13353	12838	9590	10054	11679	10614	10785	11241
5205	9121	6204	8315	5460	11337	10376	14582	8366	19463	14719	7743	4564	11375	5597	11618	5157
8239	9111	13030	11553	11578	11433	16287	18654	8868	18312	13932	10577	11199	11567	12346	15299	12582
55884	9109	8019	6534	7611	9373	9392	12751	10227	10842	9371	7612	6444	7720	7851	9901	7840
6950	9099	7905	8766	6983	8480	9618	13163	6873	9123	7556	8545	6047	9929	8082	9179	7014
7267	9096	14968	15454	14889	16823	26007	18744	9982	15770	13102	12784	14050	15972	18989	16217	15405
9761	9088	11952	16002	14550	14298	18512	23151	8171	14960	12692	10933	10852	18205	13077	14618	14608
5708	9082	14339	13759	17561	14737	23774	23542	9165	20178	18345	13132	13944	15435	15581	12780	17172
7979	9065	4614	2659	2559	3183	3185	5607	8589	3782	3092	4713	3067	4439	2966	4795	2920
1073	9033	6114	5609	3768	9497	5592	9730	8768	10902	7292	8712	3573	7536	5406	10741	4464
3371	9023	14033	13297	35023	8864	50934	8877	4964	3992	3663	6612	27649	16652	39186	5003	18656
23423	9023	9275	6545	9972	11554	13720	14627	10974	14968	15159	12964	10460	11690	10016	13112	11963
8661	9015	14992	15732	12684	13878	19388	23154	6967	20610	17203	11561	8727	18303	15213	18947	14399
10527	8998	10954	12388	9792	8585	14548	16344	6587	14662	11339	11023	8760	13063	11755	13779	9961
5701	8997	6135	5078	5444	5307	6935	9865	6847	6381	5832	6720	5503	7535	5407	7650	6383
6613	8995	7524	6357	5852	8156	8263	9819	9401	7625	6069	8381	6845	8017	7872	9678	7386
9403	8985	11117	9400	12602	11458	14254	18620	9777	13411	11894	10762	11223	13516	12651	12749	11981
9601	8981	8141	12018	9766	8396	9173	15749	6394	8536	7867	6513	6485	11396	6835	9264	7266
27069	8944	8331	7536	8549	11376	12161	14187	8101	12658	11535	8932	8878	11242	10123	11754	10046
57493	8940	12277	12310	17139	9489	23932	19474	14010	17106	17096	8628	13585	10357	21988	14299	17023
56851	8938	3863	3875	3915	6337	5539	8710	9269	7774	6454	6571	3638	6792	4519	6291	3919
6505	8934	4719	5926	1990	8798	2992	15549	8264	5984	4403	5481	1741	10855	2449	8031	1592
25959	8933	8150	9637	5178	8745	7322	11529	9433	12060	10234	12231	4790	11526	7681	15371	5779
586	8925	13436	11597	3210	15338	6049	22844	11114	20660	15077	15861	2179	10345	4575	16548	3335
51474	8917	14837	13635	17372	18117	21542	22022	15306	22479	23495	14534	8611	14454	16750	17693	12656
51522	8895	5572	3565	4607	5339	6534	6872	7922	5631	5789	7024	5588	5903	4926	6625	5870
27230	8889	8940	7140	5650	12085	9400	15983	10412	10336	8462	10091	5896	12325	6913	12529	5994
64778	8883	12078	12421	7911	10557	13600	21464	10773	15761	12514	10766	6195	16193	11004	14289	8138
6520	8872	7715	7913	14845	6043	15887	6956	5695	9997	9783	7744	11761	8917	14151	9754	14285
3329	8841	10594	13151	10852	8891	11973	18630	7937	13840	12743	9107	8812	13139	9603	11578	9526
5872	8816	5252	5212	4718	7059	5973	9221	12064	4790	4314	6104	3599	9063	5283	8127	5191
9218	8810	6495	6101	5247	6349	7372	8922	6762	7045	5366	6402	5170	7492	6420	7916	5980
6767	8785	9956	11181	11431	11770	16625	13822	6752	12255	11405	11202	10980	12028	14696	12892	12230
2739	8783	8211	7060	7026	12457	10325	12676	9320	9521	8559	8236	8194	8290	8096	10108	7613
57488	8783	9615	9675	5294	16750	8773	19385	10466	15954	11541	12377	5009	16757	7963	15520	6229
10749	8773	10424	10024	12331	18483	21632	18040	12110	16068	16291	13139	12594	12107	11747	13947	15549
6009	8761	6182	4435	4543	5431	6449	8811	7657	6660	6138	7072	4677	6603	5768	7485	5484
11030	8745	3785	3496	921	5176	1356	5369	8795	4327	2708	4595	747	5049	1674	5160	1001
6507	8732	6835	8880	36146	271	39059	260	536	121	5383	1952	45108	561	49063	784	43844
7332	8731	6255	4982	4990	5769	5844	8661	7314	6442	5396	5755	4566	6737	5178	6774	5388
537	8728	6807	8533	10135	13915	15719	14745	9822	16618	14180	12318	9808	12189	10984	12522	10925
9446	8686	3973	2882	2516	4410	3282	7655	11763	6036	6053	5512	2788	4614	3130	4940	2872
26002	8685	9738	16278	30172	1286	28180	2561	1419	436	6085	3630	22220	3762	18615	3573	28286
10992	8670	8703	9300	8792	10728	10534	13204	8731	9854	8571	8964	7943	10663	8589	10007	9529
9867	8664	11741	10828	10529	13285	16894	18553	7682	16073	12768	11780	10548	13489	14426	15979	12812
8728	8661	14436	12243	5175	8273	10862	15868	6828	14514	12982	8805	1295	9385	9152	9682	8865
8878	8656	9736	15210	20191	10248	25683	12429	9234	14900	18834	14384	18334	12594	25778	13784	19859
114883	8651	8931	6994	6637	8328	11128	9012	8352	7447	6475	8894	6901	6677	9151	12178	7855
9554	8638	8026	7038	5427	9071	9250	12820	8844	7842	7082	7815	6238	10165	6798	9683	6378
11316	8632	5022	4060	4813	5787	5289	7035	8310	5292	4974	6993	5134	5933	4903	6578	6516
22931	8604	8831	6228	6291	9370	10347	13233	9527	9953	7886	7742	6837	8806	7584	10422	7284
10589	8597	4194	4019	3674	4967	4201	6411	7843	4167	3524	4966	3111	6079	3184	4331	4305
10724	8568	9449	7205	6891	8756	12294	9420	9412	6809	5507	5497	5610	6883	7828	5994	8783
2058	8550	11753	13837	10910	11508	15416	23988	8519	20807	16174	12472	9267	18436	11730	16371	11283
5702	8541	5536	5213	5630	5582	6090	8070	5393	5837	5165	5956	4912	6675	4608	6572	5866
1968	8541	8445	6840	6016	6673	8770	12927	7817	9541	9079	8432	8726	8597	7222	8737	6827
5885	8536	7577	7861	6753	7079	9061	8837	6854	7665	5621	5381	5754	7653	7506	8245	6949
6342	8531	6254	5938	6139	8627	9116	9814	9040	9044	8063	7176	7688	7032	7623	9031	7605
10121	8519	7401	6787	7175	8749	9924	11716	7244	8304	7423	7384	6487	9406	7730	8415	7974
51079	8505	4630	3378	4572	6738	5426	6881	9408	5151	5333	6790	4931	5996	4255	6360	5746
57153	8502	8827	9221	7823	14744	13005	13260	9273	15640	11142	11326	8292	10140	10799	14708	10717
4245	8495	8518	8155	5123	13318	6870	15845	9455	13187	9807	10662	4240	12809	5027	11640	5931
26472	8480	5684	4650	4960	4838	5649	6007	7878	5449	4355	6067	3711	6053	4129	5402	5486
10938	8463	7211	6340	2944	8614	3646	11545	7535	6752	5133	8753	2955	8921	3329	8263	3529
54499	8458	5576	5408	6999	6276	8146	8964	6100	7772	6867	6910	6337	7301	5676	7279	7218
539	8449	5786	3995	4748	6022	5715	8625	8954	5874	4915	7240	5536	6166	5009	7186	5637
2590	8444	11965	11597	13752	9136	16897	16824	7560	15294	11958	10448	7851	14370	17361	13016	14967
50854	8436	5811	3493	5640	7246	8675	8722	11793	5712	5135	6206	6654	6406	6567	8331	7365
81688	8435	7051	6486	6563	8824	10009	10101	10420	6994	7178	6227	6974	7676	7791	8389	7622
10576	8429	9396	8872	8290	7986	9429	14550	5669	11088	9601	9592	6571	11163	7590	11459	8561
10935	8422	7150	6594	6727	8146	9462	11861	7602	10592	9793	8026	7635	8851	6890	9159	7634
64399	8383	3131	5016	1516	5280	1879	11373	3665	20975	10857	5815	769	8337	1835	6024	1557
10493	8369	6190	9242	5800	8698	6716	6821	4165	10720	8595	6743	4268	8714	6700	6592	5967
5621	8367	9896	8340	21680	7868	33927	12031	7544	11787	17004	8094	23676	8025	19256	8589	22559
2149	8356	10354	10541	3306	7795	6041	14594	5930	4900	3640	9497	3745	15276	6756	8976	2032
92140	8345	9195	9928	8695	10562	11934	16312	7405	14291	11806	8743	8135	12809	9259	12244	9269
25937	8320	11003	9830	11691	9894	21960	12175	7840	10117	10265	5829	10930	10052	15971	9689	12551
83658	8288	4264	2937	3398	5200	4254	5869	9926	5033	4017	5763	3972	4978	3970	5819	3781
1312	8282	4425	4987	5288	7004	8564	6856	6151	8863	7330	6113	4846	6673	5823	7432	5614
1642	8273	12830	12452	13237	13401	19844	18270	8413	14990	11985	10705	12324	14196	14712	13564	15198
23012	8273	19069	9814	7673	26353	22363	28976	20493	23335	19726	21045	7182	14824	12108	24614	7742
51150	8265	8861	8854	11936	10979	16920	15126	8548	14741	14614	14118	11662	12882	11982	11972	14482
55214	8257	3285	5148	5044	4688	5672	7824	4570	4023	3034	2823	5807	6427	6027	2920	6447
2746	8253	6704	6384	6264	6777	8079	9489	6767	7663	7420	5782	6235	6928	6735	8286	7351
81552	8253	7938	6419	7727	12168	14718	13471	10416	11093	9401	8164	7131	8943	9780	10191	9548
3091	8253	37179	33310	18535	28850	17864	53769	5609	47178	26185	29751	11695	36611	16526	33054	18311
7430	8250	7509	9530	10299	6379	9531	7240	4750	9644	8818	6268	8180	4179	5904	7636	9204
1363	8250	10303	6450	6214	12955	8083	18260	15366	7661	4770	16279	2853	11871	6659	20170	5780
1464	8247	9770	18603	6041	32384	12176	37322	18260	58904	49742	23926	1783	19284	5651	34029	6837
9877	8243	9117	8526	7510	9500	11300	11988	9293	8528	7897	8210	6899	10645	8945	9751	8113
9789	8228	4622	4777	4663	5893	5979	7291	6932	5864	4883	5570	4286	6420	4867	6134	4632
5832	8226	7852	6861	6329	9065	7921	12504	8847	6756	5446	7124	5595	8632	5950	7523	6666
2	8216	6669	2486	1585	2878	1269	11016	6082	1835	4535	5329	4243	15591	2138	6930	1615
10890	8211	8616	8240	8864	7827	11170	12777	8360	9676	8753	7614	7774	9968	8701	10481	9679
79901	8195	6443	8111	4631	12142	8869	26453	20721	17565	13756	9077	5494	12092	7087	31850	7821
29058	8185	5333	5609	6421	7983	10108	9636	10425	8025	7442	7556	7275	7625	7556	9295	7383
6611	8178	5581	4613	2939	5828	3319	8857	7376	7182	4836	6624	2259	6156	3624	6473	3000
23770	8166	9232	6660	8267	12514	11163	11151	11793	9849	8548	10121	7613	9482	8916	10524	11834
51299	8160	6794	3284	589	9913	1723	16411	13423	9685	6837	10396	656	6648	2209	9021	1196
2034	8140	9601	11586	4224	14061	5583	24823	17751	28233	18586	11603	6455	14660	9542	32980	7021
2821	8138	9155	9257	6488	13803	9582	16230	10447	12841	9514	11710	6740	11464	8976	9226	7007
134553	8132	11555	7846	4604	11019	8011	15962	9845	14260	10611	11104	4494	11913	6786	15333	5990
5111	8131	3960	3774	3000	2475	3517	4434	4131	3655	3023	4210	2815	4281	3127	4263	3537
29889	8127	3699	2508	2194	3208	2869	5230	5635	4001	3322	3848	2291	4404	2425	4009	2633
54867	8109	6529	6975	5018	8920	6933	11527	7782	9049	6854	6911	4255	9878	5593	7940	5551
6628	8098	5473	3657	2669	5635	3407	7135	6055	5955	4954	6568	2697	6134	3118	6440	3559
3842	8094	10698	13682	13127	9421	21523	17234	6620	16142	13174	8921	12227	14129	15473	11954	15199
5721	8089	3084	2944	2083	4015	2277	6779	6926	3223	2962	3707	2124	4580	1930	3981	2714
25802	8079	10249	6315	3517	10875	6247	15229	9441	10878	7019	11429	3396	10898	4793	14864	5428
10447	8062	5919	6536	3739	10951	5738	16767	9671	11880	9082	8173	3745	9853	4127	8839	3745
64236	8060	10088	6305	3275	11698	5482	13365	12497	9948	8525	15581	3107	11935	5901	17109	4823
92689	8058	10955	9493	7424	13509	12500	16708	9883	12309	9440	8776	6904	13524	9224	11756	8649
3895	8058	12998	14240	18111	14370	26740	19263	7905	16100	15792	8963	18129	13589	19126	13876	21070
6624	8038	7113	7477	9591	8367	11677	10159	5969	9342	6402	5953	7656	9221	10669	7819	11803
37	8031	10297	8244	10653	11993	16863	13686	16217	8156	7188	8198	9569	11432	12868	5750	11923
9411	8027	9081	8898	7247	12813	14379	11773	7983	8830	7731	7815	11110	10194	8131	11246	11601
7334	8012	5891	4207	4493	5220	5649	8795	7344	6431	5049	5856	4688	6879	4827	6372	5277
5817	8005	7623	8197	4758	18203	9494	20870	12823	20518	21494	10696	4515	14429	6212	13713	6595
93974	7999	3857	2597	3310	5099	3622	6033	10557	3441	3337	4972	3607	4242	3022	4196	3833
23190	7999	7508	7399	7133	8122	11363	11516	8306	8787	7279	6373	8154	9412	8796	8632	7986
51614	7994	7632	7590	11950	10910	16479	13461	7670	12608	10965	8931	11814	11605	13674	10707	14332
26020	7984	13406	14268	17963	20404	27633	21287	8937	23313	21081	15462	14299	17341	20821	16303	21434
4670	7983	7389	9210	6992	5431	5952	9620	3928	6884	5495	5910	4364	9425	5207	7556	6219
7165	7983	10535	8440	6895	11606	10374	17097	9070	12175	11252	12329	6868	12976	7538	13066	8523
2182	7978	7944	7866	7619	9234	12756	13851	6967	13119	10726	7980	6845	9280	8309	9983	8051
377	7967	7911	8158	9618	9641	12700	11508	6659	10222	8929	8239	9701	10527	10257	9222	10680
3281	7964	6569	5542	6507	8130	9031	10243	6781	6573	5997	6007	6828	7531	6435	7240	7963
9415	7963	12567	10854	7674	26251	10098	24653	13649	16736	18965	15323	4953	12572	5816	30834	8882
23524	7955	14939	20057	17529	11759	22691	15374	11958	15837	14131	11357	14127	15825	22960	12197	16706
1781	7946	8849	7416	7262	9400	10420	16390	7539	11553	9838	9356	6547	12394	8052	13809	8523
23365	7929	9005	11894	10029	11161	15650	13253	8021	13642	9383	7335	8689	10559	11246	12684	10619
1615	7915	5454	3780	4178	4949	5311	7123	6415	6056	4360	6637	5259	6090	4631	6467	5193
79188	7908	6583	7958	5620	6850	8280	10119	6221	9110	6534	6113	4898	8834	5856	8901	6458
8615	7897	9597	10447	7644	12595	11797	19958	8296	12210	9872	10317	6662	14036	9152	13847	7938
285704	7891	6783	9371	4039	20250	10148	20745	9145	16096	10773	8588	4402	16644	7000	9285	4521
3692	7876	6164	4620	5197	5572	7142	8419	6520	5905	5393	6397	5306	7613	4616	6542	6312
5682	7857	5764	4421	4705	5490	6889	8714	7576	5860	5072	5514	5192	6293	5432	6222	5108
9124	7851	6330	4487	4559	9074	8695	11628	9327	9241	6617	6629	4574	7287	6291	7565	7264
26353	7821	3615	3127	3212	7692	3619	7807	7111	8684	5921	6750	2787	5323	4611	6251	3538
5870	7810	11218	9466	10207	13768	16583	19353	9790	13963	10911	10386	10216	13920	12423	14025	11307
10413	7799	11477	12207	9212	13998	13593	19891	8157	16237	10841	10756	7694	14699	10948	14298	9262
153339	7792	8415	8008	7545	8290	12954	13922	8925	9524	8070	7156	7155	10028	9010	9547	7461
5819	7787	6797	5880	6022	8820	8365	8757	7739	7492	6961	8778	4638	6938	5609	8776	7477
3840	7778	7874	6292	6780	7397	9621	9740	6357	9136	7972	7100	6147	6710	7114	8011	7180
55914	7772	8747	9140	11799	7774	12395	10299	6446	8064	6349	6224	11374	7339	10891	9334	11714
6319	7770	16786	16038	30210	23384	40817	18100	12002	17379	31611	23382	16369	9138	19122	31983	16636
7360	7766	8176	10027	7123	15361	11783	18254	7335	13765	9543	9385	5893	19528	8750	15971	7343
4043	7762	7262	6818	10641	8197	14919	9941	7274	10178	11143	8855	11097	8511	10807	8490	13199
56681	7746	8722	6639	5485	9297	8391	13941	8960	7492	6091	7097	5778	9970	7464	9006	7093
1349	7744	3564	2709	3167	4449	3885	6270	8997	4455	3970	5264	3376	4130	3350	4625	3451
7756	7743	7062	5754	5268	5289	7177	8779	4939	5691	5324	5697	4803	7382	5652	7315	6413
6651	7741	11709	13143	11669	9492	16767	15802	6054	14864	11479	8889	9970	13342	15101	12512	12372
9584	7737	7410	8552	7966	7733	11440	10103	10957	7201	7537	7432	7503	9438	10520	7354	8032
51186	7735	6935	5759	5282	7351	6988	11946	9520	7973	6264	6945	4913	8637	5907	10046	5474
51372	7715	4162	2715	3237	3789	3664	5260	8902	3735	3501	4434	3702	4283	3228	4763	3506
54206	7714	13553	10708	4519	10442	5167	28523	26057	7920	5357	11122	5265	14208	5658	11337	4245
1983	7708	10645	9114	9664	9818	15253	14747	7557	10577	10098	9210	10452	11328	12293	10594	10637
81876	7703	7774	7139	7865	8522	10017	10618	6540	9569	7932	8067	7740	9365	8054	9063	9385
5705	7702	4788	4862	5600	4940	7182	6662	5377	4907	4719	5410	5165	6448	5806	5643	6115
11335	7696	8706	7236	7186	6329	9197	10411	5977	7301	6138	7340	7310	9261	8504	8667	8240
5693	7691	6133	5481	6472	7332	8553	9764	6667	7162	6439	7445	6212	8122	6218	7794	6869
2247	7685	8534	9272	15133	7994	23144	8124	9130	6154	7693	3937	24564	6420	12864	5697	15102
9444	7668	11036	11049	16346	11299	25465	12366	6766	14724	11974	8941	15634	9684	21333	12959	20161
2799	7664	12232	16193	17077	14602	25731	17733	6090	21579	19391	12584	14583	14997	18881	19117	19549
60592	7662	7652	5591	7523	10115	12755	12694	9272	8439	8005	7624	9483	8029	9054	8669	9500
1783	7653	10649	10260	12401	11467	20875	15703	10934	12453	13087	7862	12106	10680	15673	11196	13547
221035	7643	7179	7120	4351	13845	7832	15649	11590	16181	10941	8820	4739	9000	5208	12630	5321
4055	7642	3752	4341	2554	4394	2934	6766	6471	5934	4897	5688	1914	5804	2411	6795	2675
8324	7638	8995	4601	3897	6944	8650	10309	5963	5708	4848	7734	4545	4918	5039	7030	4859
7328	7620	14757	10767	29609	10844	38310	12664	7998	9690	11955	8192	30298	9335	29302	11185	36217
1627	7614	10880	9827	14434	9588	15980	13031	6958	8893	8881	11210	9287	9743	10145	11103	16997
27125	7612	12966	11304	9490	10471	13585	16983	7650	14888	10262	8946	7789	12146	11450	12382	10277
8761	7610	5065	5710	4972	5421	7057	7342	6200	7605	5842	8427	5150	6522	6122	7622	4709
1889	7602	10146	12500	14221	10407	23140	15216	6511	13763	14109	9001	12645	12204	16136	9830	16673
8665	7597	6550	5528	5257	9106	8488	8300	8210	8658	7620	10283	6401	7962	7364	10651	6366
1964	7583	7592	4945	4631	5506	6953	11711	6527	8580	7161	5912	7161	6152	5280	5958	5211
11333	7578	6002	5348	5034	6481	6745	7267	6716	6020	4659	6131	4794	6916	5291	7076	6319
8664	7569	6844	5641	5942	7368	8040	10263	6255	8087	7003	8000	5902	8219	6771	9582	7436
400	7563	5912	5390	5458	7357	9446	10779	7245	7126	6281	5865	6519	8031	6239	7350	6433
22883	7553	8823	11791	16874	9492	25862	11982	7695	13554	13206	8697	16672	11158	22833	10075	21213
2926	7550	8530	7194	6045	10235	8877	15050	7308	10399	8182	8898	5504	9585	6542	9772	6385
481	7547	2118	2811	1730	4509	4198	5429	5709	6122	3715	3741	1863	2926	1781	2653	2102
830	7542	9748	8319	8483	10566	12466	16778	6990	11643	10008	9889	9360	10924	9099	11452	9836
3189	7540	6209	6667	6342	6705	7947	9520	5865	6443	5821	5752	5237	7611	5770	7721	5701
64968	7538	4715	4117	6676	6816	6412	5027	5038	2977	2129	3320	6064	5106	5711	6159	9558
6415	7534	7955	4144	4146	8693	5046	11171	14251	8681	8417	9980	4759	7554	5078	10147	5802
10211	7534	5429	6428	9442	4504	13474	6382	6152	5013	6770	4786	10847	6269	8684	6549	10004
11100	7532	9099	9558	7260	7416	9806	9501	5603	7880	5929	7072	5833	9664	8753	9354	8434
7058	7527	32750	28737	5724	24194	13936	35255	15707	16811	27283	46567	1337	46831	25325	47650	3484
84833	7526	3642	2376	2432	4566	3190	6292	8659	4753	3795	5220	2861	4333	2776	4940	2813
5328	7525	5004	6407	15870	5188	31934	5541	4355	7870	6618	3426	11698	10157	19083	5348	7730
214	7516	14037	16845	20979	14053	23234	20993	7413	20610	18961	6872	15835	18698	15599	13896	24382
5547	7506	6684	6196	7779	8154	12018	10265	5148	9603	8109	7255	8891	7279	8214	6473	8732
5464	7505	6214	5611	11312	3925	10238	6488	4897	5342	6572	4524	10230	4578	9961	4877	11050
382	7500	6389	6406	4171	10795	6726	11614	7091	7941	6715	7822	4904	8693	4880	8209	4955
1639	7498	9522	13034	14092	16573	20542	18044	8313	16738	16888	16392	13570	12694	13097	14508	14878
57222	7476	10552	9926	9644	15751	15127	20155	10419	18427	15928	10679	8643	13106	11608	14366	11829
3094	7470	8795	5336	8816	8613	10668	13536	8720	9551	8937	11614	10323	10628	8805	10351	9602
10313	7465	6391	8055	9600	11466	12976	9781	7969	10478	9029	7955	9675	8214	10740	9455	9233
81611	7459	6415	4677	2981	5142	3902	6984	5212	6158	4744	5800	2591	6111	3626	8105	3515
207	7458	7695	5833	5572	7736	7593	9824	7271	7846	6523	7659	5948	7716	6541	8203	7081
6923	7458	4808	2853	4231	4809	4834	5551	8142	3953	4086	6089	4277	4979	4005	5577	5051
55000	7438	7585	8402	7608	7150	13043	9660	7762	8520	6948	6984	7905	8528	10127	8940	8516
10769	7435	10187	14997	40573	5852	39169	4933	4329	5097	11923	3222	27937	5358	25582	5377	32267
3735	7432	5026	4855	4572	4485	5549	7001	5305	5842	4806	5522	4249	5753	4443	6355	5198
10776	7430	9859	7995	9070	9779	13691	12661	7127	12047	10365	8137	9965	9482	10401	9489	9881
23468	7417	6361	6913	9005	4611	11333	6579	4578	5817	5130	4496	7949	6239	8302	6931	10280
231	7416	2246	4736	2126	4634	2724	2843	2329	2779	2120	2861	2940	4945	2237	4030	2374
8031	7400	8945	9229	8854	8179	12238	14765	4633	12316	10788	7669	7951	10927	8869	12302	9533
6633	7393	4795	3280	3956	4576	4347	6550	6738	5073	4741	6895	3979	5859	3767	6455	4384
7042	7387	10437	8321	20376	16610	34448	12000	6999	23994	22715	9745	17338	5995	27799	13460	20914
5162	7385	5740	4032	4075	6443	5767	7975	6340	7161	5408	7249	4386	7072	5064	8515	4859
1656	7384	7444	7567	6716	7083	8571	8455	6857	6920	5735	5773	5560	7283	6885	8128	7449
5688	7382	6395	4805	5252	5672	5445	9893	7560	6863	5968	7917	4856	7656	4585	7180	5861
23670	7382	7352	9527	11767	5396	11778	9221	5552	5621	4704	3512	8286	8025	8960	6116	11656
1622	7378	5538	4366	8992	4371	7657	7032	5139	5028	6344	6297	9471	5666	6979	7229	8020
4898	7378	7298	8169	6411	11422	9085	15412	9192	12635	9837	9352	5839	9942	7038	10056	6613
10606	7377	7143	5878	4342	5547	5371	9148	4992	4348	3698	6231	3889	8123	4661	5474	4880
133619	7361	5976	5647	4000	5287	6395	10283	7107	6037	4438	5090	4096	8896	5259	6625	4570
7041	7358	4784	4792	2601	5019	4080	6180	5559	6205	4208	5732	1906	5829	4250	6957	3223
56172	7354	4779	5852	1916	7766	2761	8725	7005	13007	7518	6418	1609	8479	3592	9830	1627
2633	7346	5156	5411	4732	3962	3500	7478	3569	4306	4404	4508	4097	5405	3064	6393	4175
23243	7346	6163	5920	3633	11329	4815	13518	12494	9353	5102	5149	3256	10447	3834	9836	3913
2012	7345	4588	8605	1865	5772	2266	11274	5762	6769	5677	6238	1833	11243	2124	6435	2350
5719	7340	5406	4243	4359	5478	5825	8250	6908	5934	5319	5847	4296	6085	4124	5856	4903
521	7339	3262	1933	2394	3577	3047	4654	7475	3370	2960	4249	3020	3676	2537	4162	2767
1843	7326	10245	15906	26616	11597	9300	16204	11138	13442	11843	14371	14353	13859	11140	10874	9961
1660	7323	8213	10275	8780	6256	9922	12168	3913	8397	7040	6739	6797	9780	7745	9503	9012
5710	7315	4792	4024	5286	4244	6072	6458	5686	4346	4315	4825	4546	5112	4647	5126	5754
3068	7313	8601	9333	8750	8719	11359	11296	5628	11046	7673	8167	6665	9740	8580	10435	9080
5604	7304	5991	4596	3963	12349	6195	15533	11475	8692	6167	7425	4634	9473	5403	8342	5154
55031	7302	6713	6543	9078	7264	11802	8790	6199	8557	7545	5563	9544	7226	10542	8002	10172
3098	7300	10565	9368	7944	11459	11192	18581	7235	14925	11720	11762	8237	12516	9917	10876	9769
10857	7298	5139	4930	5106	7790	5960	8577	5831	6144	5038	4843	4803	7046	4950	6431	6246
10174	7298	6157	6249	4181	5272	5947	6065	6195	5531	3915	4955	4298	6693	6130	6209	5294
1347	7296	5441	3416	4114	6577	4933	9335	8675	6250	5718	7847	4288	6991	4398	7651	4913
4141	7293	7632	8098	7511	10493	11354	12347	9531	12933	11145	8116	6284	10965	7616	10977	8269
1605	7276	11280	10857	16703	9861	23757	14277	5513	16428	13542	10920	16264	11088	17682	14165	20840
23704	7272	6533	6684	836	8553	1646	11116	8389	11897	7045	7450	328	9174	2815	8995	953
649	7267	10371	9681	8704	10902	14227	12766	12426	15659	13289	14280	6239	12077	12007	13735	9808
4179	7256	6419	8764	6059	11331	11432	16557	8706	12610	13571	9262	5847	10699	7969	9940	6525
11117	7254	7848	9986	2226	8467	3440	9985	6747	6807	5547	8056	587	10895	4444	10301	2739
9551	7246	4134	2931	3584	4299	4147	5887	7496	4294	3998	5383	4073	4538	3629	4962	4347
1756	7241	10925	9120	6961	12276	10566	14498	9215	12720	10857	10267	6322	13234	10657	14406	7228
10054	7231	5726	5399	4231	5451	5897	7686	4733	7900	5794	6386	3868	6743	4845	8173	4650
22818	7228	5888	5595	5841	6396	7152	8049	6204	6165	4962	6000	5678	8035	5821	7624	6338
8773	7227	5722	4921	2748	7182	4786	9069	7876	8050	6488	6308	2721	7117	3704	8779	3030
292	7226	6154	5829	5021	6488	6192	9262	4375	9120	7202	8116	4745	7657	5776	8906	5929
8148	7216	5793	7476	6505	7116	6791	8484	5989	6166	6208	6799	5104	6972	5175	7668	6976
50809	7213	10614	10845	12020	9074	15825	12959	7316	9874	9492	7375	10067	11615	12721	10404	11858
9774	7203	8873	10038	8869	6988	11369	12199	4639	10024	7656	6755	7634	10270	9339	9954	9577
529	7200	6833	6625	8793	7876	9660	11087	7865	10102	10247	10853	8696	8675	7703	11761	9387
5740	7181	12065	5219	409	4744	437	7904	3087	4731	3261	6721	335	6178	2184	10580	608
1211	7175	5282	5351	5991	6170	8419	8402	6265	8252	7569	9285	6543	7477	7046	8209	6856
58533	7167	7387	6907	4498	8130	6984	12356	7229	9414	8140	9592	4599	9572	5386	10537	5278
7341	7166	6561	5334	5150	7243	6917	8958	7994	6560	4998	4887	4769	7236	5419	7022	5535
10575	7158	7666	8642	7034	8698	9109	14300	4892	10580	9292	9520	5928	10449	7052	10198	7476
10594	7155	8969	12162	10104	8169	12682	14194	6042	12396	10652	8194	8937	10959	10753	10629	11161
5714	7143	7241	5276	5218	9851	6543	12068	7504	9552	8232	11240	5369	9283	5218	9602	6142
10093	7143	5854	4652	5321	6051	6410	8230	5794	6066	5693	7363	5481	6129	4798	6675	6321
3301	7141	6774	8890	8155	6933	8474	13276	5927	8729	8592	7836	6340	10361	6752	8075	8011
8985	7139	6187	7088	5541	7223	6534	10524	6240	11071	9069	9055	3694	9610	5734	8510	5625
3597	7138	6628	6328	3537	6958	5334	9528	4629	10635	6883	6400	3872	7597	5444	8341	3870
64759	7136	8307	11357	11094	6634	17357	11150	4338	10655	12504	7657	14533	11225	15170	11460	15878
4077	7134	8015	8730	10493	11797	15977	13642	6584	13144	10011	8144	9790	10212	11576	11680	12234
10961	7129	5733	6077	7991	6240	9239	6937	5280	8766	8353	7217	7304	7492	7383	7829	9057
26003	7124	8075	6350	6040	8129	8635	11729	6732	8528	6850	6710	5789	9256	6575	8948	6703
1953	7121	13978	6124	7789	4820	15753	7618	4740	8970	9455	9359	30859	10617	9083	9870	17619
6050	7114	7149	6390	6184	6596	6121	10298	7873	9751	8153	10193	5047	9126	5835	8650	6834
22919	7114	8196	7505	7527	8639	10751	12734	6111	10556	8276	7374	6485	8977	8447	9444	8145
51335	7107	6945	6067	8548	9797	12011	9994	7671	8376	7606	7233	8635	7597	8828	8657	9774
11231	7103	7872	7130	6047	9983	9568	13320	6665	11068	8777	7156	5560	10693	7547	9930	6967
140606	7097	4102	2860	2331	6075	4004	6009	10293	5018	4027	5963	2626	6384	3367	6261	3667
8140	7097	10495	8000	19609	5722	25980	5562	4164	8990	8762	4556	14989	7284	20916	6983	16100
514	7097	5812	4845	4970	8515	6507	9438	8877	8057	7369	8667	5779	7973	6015	9273	6354
80232	7096	8124	7769	5928	9611	10175	13401	8678	10181	7796	8622	6251	10693	8168	10057	6762
6672	7092	5679	5104	1029	7071	1882	10674	9200	7456	6362	6902	717	7786	1968	7999	1550
1329	7066	3578	2537	2998	4302	3533	4782	8422	3855	3735	5394	3612	4074	3191	5195	3477
54495	7057	5779	8432	5472	7644	8769	13117	7235	10309	7103	5208	4438	10294	5806	7872	5323
928	7053	5333	3737	4507	6560	5656	12694	13201	7085	9153	7698	6693	8784	6034	7161	6429
23353	7035	6064	5879	4050	7750	7124	9911	9525	8704	7157	7727	4717	7749	5960	8013	4541
2271	7035	3722	3937	2948	5522	3709	6390	5362	5188	3790	4158	3166	6354	3070	4988	3049
5684	7026	3697	2678	2494	2693	3163	5899	5504	3655	3244	3428	2630	4502	2635	4448	2800
23787	7025	9742	7215	7975	11799	11200	14477	7837	10833	8969	10606	7628	9881	9209	9490	9171
55829	7013	4323	3716	3116	4723	4020	8291	5738	5127	4462	5040	2956	6250	3212	5269	3270
10980	7013	3959	3516	3967	4359	4747	5782	6360	4404	3832	4812	3701	4935	3796	4981	4665
60674	7008	4666	2873	4947	4949	7611	5070	9077	4547	4673	7239	6625	5524	6462	6938	6317
64943	7007	7683	6735	6816	9543	9306	12544	8597	6777	4577	7195	5964	9109	7322	7618	7482
6237	6995	4861	3664	3205	7901	4963	8239	13625	6067	5738	8102	3876	6411	3748	7834	4306
8654	6992	6924	9990	3437	9415	4789	17741	9661	6864	4027	5525	3570	14747	4476	13045	3050
10226	6987	8872	8369	4854	11002	6417	14014	6075	9997	7847	9522	4312	11831	4821	9008	6190
10914	6987	9383	8943	7988	8375	10340	12539	7205	8575	8213	6823	6938	9508	8807	9323	8441
6594	6977	8728	7162	5347	10120	8473	15973	9196	11964	9391	7349	4302	10129	6708	11933	6737
100463486	6975	1947	5250	5637	22259	10600	9100	35466	7916	9649	11977	9538	6095	7352	8453	4888
1108	6972	9111	11524	10294	9799	12589	14621	7688	11166	9345	7773	8091	11397	10903	12295	11280
51109	6969	5413	5843	6671	7989	8287	10255	7168	7126	6960	6739	5788	6796	6202	7766	5947
94239	6967	6717	5884	6160	5538	7764	6743	5243	6139	4844	5210	6248	5925	6515	7905	7085
10095	6947	6303	5118	4428	7077	4947	9650	6214	6906	6859	8087	4272	8181	3920	7900	5352
7026	6946	8810	7960	1898	8358	2865	12031	7968	8181	5424	14569	1926	13618	4304	14523	1691
8848	6945	9222	10905	13754	7463	22368	12884	5187	7159	8579	7918	13738	9961	18882	10257	15477
3075	6939	4625	9568	1205	9505	2026	16915	9565	6786	3942	9498	370	12713	2661	13105	730
11140	6934	6946	6289	5612	8892	8071	11138	9878	7457	7745	7340	5067	9628	5912	7860	7058
114907	6934	17106	13674	33633	10848	45302	9922	9685	9236	15151	6752	34017	5109	29238	12592	37608
57092	6932	8230	7341	6641	10200	10934	12538	8860	8520	6718	6415	7287	9059	8499	8727	7491
51504	6931	3110	2848	2788	3758	3335	4712	7166	4098	3622	4786	2840	4190	3029	4803	3161
10133	6931	9484	10111	7637	22251	12470	21867	11382	19026	14691	11944	6601	16101	8946	14881	8888
5685	6929	5735	4572	4081	5289	4726	9872	6704	6754	5400	5827	3555	7534	4583	7310	4311
2098	6929	5673	4448	5445	6383	7224	8820	5356	8022	6873	6968	5871	6329	5660	8050	6063
23367	6917	7895	10280	7672	9819	11784	11635	6715	14016	10788	7599	6234	10268	9607	11122	7811
10130	6914	17342	16609	17689	13971	19242	28248	3595	19817	18736	14137	12028	19898	14921	16682	15089
7048	6908	4829	11638	4993	12807	9403	13576	7097	10480	9013	4707	4959	14351	5573	10740	5075
124565	6894	6995	6186	7621	8519	10868	8408	6808	8184	7910	6454	6609	7312	7419	8548	11235
4947	6889	6078	4905	5891	8102	8179	9416	6370	5994	5093	5949	6631	7096	6170	7042	7161
51386	6888	8738	7910	9276	10054	13535	11045	5708	9832	8900	9826	10424	10486	12177	13148	11680
84641	6882	4055	4490	3662	4143	5192	6433	3976	5166	4706	5054	3616	5496	3434	6112	3828
10797	6880	10319	8619	4894	8508	7495	12999	8136	12864	9702	7621	3654	12034	5308	13786	5501
22836	6880	7020	6145	7100	7206	11005	6886	7772	4955	5701	6921	4910	5823	9173	11132	5925
54918	6880	5983	6140	5550	5531	8102	9446	5368	6239	5814	5756	5610	7419	5813	7389	5623
11183	6876	7322	6570	5190	8240	8940	10748	6920	9104	6529	7311	5235	8287	7384	8794	5765
65125	6869	8168	10595	13360	8169	21387	10863	6450	11265	11300	6442	11816	9671	14988	10802	13801
7916	6867	8313	11218	10013	9498	13161	11205	5909	10325	9111	7669	8111	9865	10925	9891	11413
307	6866	3592	4232	2694	6312	3941	5605	4032	5948	5552	6175	3021	4660	2700	7211	2577
3066	6849	5768	5569	4074	6589	5191	9425	6103	6648	4932	6168	3265	7591	4368	8039	4373
11260	6843	11686	12468	10472	10942	15974	15298	9378	17388	13919	9295	9352	14727	12854	15446	12025
7003	6838	12383	12642	11398	11299	18478	16036	6454	16579	11703	7693	9729	12382	13234	13586	12741
2171	6837	3435	3600	6017	805	3929	1632	1493	1139	1726	2460	3027	2122	5315	1843	6403
7284	6835	4545	5013	6063	6293	7860	6847	5859	6294	5778	6355	5812	5971	6087	5684	6843
10963	6819	6016	7891	6085	7740	7487	11599	5347	7897	6665	7398	5248	8689	5618	6849	5830
7388	6817	4883	3173	3246	5565	4400	6871	6790	5393	4556	7108	4055	5754	4011	6275	4204
23196	6814	7208	8570	7260	9043	9906	12879	7325	12688	9681	7339	6265	9580	7964	9523	8192
10618	6814	11913	13455	12689	12959	22924	23329	7465	20272	18129	9127	10494	14505	14438	13384	13192
10598	6804	3901	4256	3984	4356	5259	7180	6751	5011	4572	5717	3824	5573	3741	5206	3947
659	6801	9053	8943	8843	9924	13249	14170	7351	13082	9334	8538	7587	9872	9067	11692	9500
25891	6795	5567	6954	10495	15489	24909	7408	6766	6199	6344	4726	10796	9075	19874	8584	19986
9978	6773	3679	1999	2536	2946	2889	4666	6979	3235	3030	4204	2887	3848	2393	4158	3115
4830	6771	3034	1966	2409	2097	2545	3956	4792	2577	2450	3485	1781	3103	1937	3034	2488
79921	6766	6011	4188	4969	6075	6853	7559	6918	6323	5905	7040	5160	5859	5763	8840	6364
2250	6763	3733	5400	780	6239	1771	14856	6053	14772	7395	5761	454	6260	1037	4557	930
51128	6761	4118	3877	3355	6157	5032	7558	7340	6339	4853	4800	3455	5435	3454	5575	3769
79770	6757	4518	4954	4468	6622	6613	7766	5627	5992	5303	4172	3738	7328	4967	5858	4840
11338	6756	6116	6150	6706	4623	7131	7597	5298	5373	5418	6064	5156	7222	5765	6801	7820
4809	6750	3844	3196	3631	4420	4751	5839	6084	4645	4020	5045	3914	5077	4049	5112	4024
1460	6750	3817	3591	3162	5925	4826	6418	7378	4559	3652	4812	3484	5131	4412	4547	3416
2669	6746	8121	3209	1351	5793	1265	7251	12864	4945	3425	8227	1120	5934	4217	10422	1563
25912	6740	6399	6855	7489	7866	10047	10734	5907	10514	9096	8402	6764	9249	8332	11037	7856
1499	6739	13247	16518	16688	13926	21375	20513	5251	15272	14843	11780	14283	15793	16360	14924	17394
10949	6729	7091	5406	5314	5635	6660	7103	5248	4859	4303	5898	4748	6828	5686	7560	6193
9296	6724	3699	2865	3669	4141	4134	5804	7678	4312	4870	6982	4447	4379	3786	5795	4368
7082	6719	6060	7641	4105	5858	5562	8748	5264	8033	5712	5843	3597	7458	5048	7964	4707
9564	6717	6071	5112	4438	7507	6539	10411	7760	7218	6088	7805	3942	7823	4316	6734	4900
55573	6715	10759	11725	15564	10862	22494	13142	5046	11209	11740	7995	12839	11176	15303	11835	18499
26064	6710	11054	11649	9597	10468	16766	17864	7143	11192	11736	8656	7568	10313	11980	14887	11322
5720	6710	3299	3515	2604	3826	3277	5878	5287	4202	3816	4171	2907	4949	3213	5019	3877
7917	6708	5748	7236	7591	6557	9252	8163	5976	7921	6787	7284	6639	7088	7756	7376	7932
515	6706	6728	5353	6744	6253	8247	9652	5446	6934	6469	6145	6492	7183	6816	7781	8075
10026	6699	4905	4716	4008	6325	6059	9284	5383	9167	6045	5704	3994	8092	4550	7740	4448
8720	6694	6961	7218	5903	9193	9526	9849	6147	9337	7569	5900	4792	9356	6654	9308	6279
26065	6692	6475	5769	5717	5938	7501	7759	5681	7066	5336	5861	5501	6466	6691	7417	6605
5441	6688	3615	3426	4235	4738	5142	6332	7618	5070	4374	6100	4655	5781	4230	5193	4751
51646	6685	7567	5844	6857	10790	9181	11901	8986	8909	8264	6863	6299	7440	6248	9489	6889
9537	6677	7678	5164	1454	11776	3464	9515	8582	5079	4145	7792	1504	7751	3636	13341	2038
25844	6677	5623	6887	7743	8549	9983	9894	6083	8576	6835	7001	6919	8787	7871	7562	7628
5709	6676	6022	5252	6577	6078	8749	7978	5394	6232	5583	5877	6118	6460	6103	6135	8232
3958	6675	3247	3644	3729	3554	3580	3781	4303	4296	4088	7025	5276	3747	6237	4339	4995
5700	6666	6652	4994	5262	6817	7434	9882	5432	6706	5653	6690	5171	7203	5352	7050	5797
4643	6662	7871	6464	4415	8022	8020	11615	5800	10019	7756	10467	4377	7845	5856	10244	5923
11079	6661	5258	5392	5309	7494	7287	9922	7079	7593	6903	6781	5040	8291	5930	7557	6059
80727	6653	7133	7654	9062	8706	8788	7154	3745	5945	5797	9737	5935	7157	7618	9163	9401
6059	6652	5180	5522	4018	4516	5777	8875	3600	7299	5772	5307	3358	7066	4320	6759	4177
23433	6650	6556	6781	5124	10160	8694	13036	11818	9080	8008	8728	5640	9200	7854	11769	5330
3005	6648	9413	5516	4939	14577	8281	10020	6455	10909	8157	7339	3911	7881	6917	11084	7003
7514	6646	7649	11380	9464	8022	11264	13351	8038	11787	8472	7404	6607	11492	10953	10260	9335
3340	6646	11577	12194	15222	10417	23978	13832	4886	11863	11224	8004	13086	11156	16610	11987	14739
22913	6643	5164	4229	4850	5076	5379	6096	5159	4797	4178	5786	4574	5132	4419	6129	5376
11222	6636	4356	3730	3129	3322	3647	5639	4106	3919	3437	4087	2503	4998	3199	5077	3679
26010	6635	5165	6550	4779	9196	7867	9150	5755	7573	6936	5716	5503	8654	5625	9069	6024
9295	6634	6644	6752	5753	6760	9678	7892	11214	4637	4868	5278	5892	7312	9497	5181	6740
126393	6626	4230	3085	1530	2661	4331	4158	8224	825	1071	7969	2867	7635	1751	5351	2125
5695	6618	4195	3168	3605	4552	4641	6207	5703	4503	4194	4681	3480	4665	3546	5536	4214
51026	6603	6593	6469	4288	7021	6395	12863	7705	8169	6023	5922	3499	9842	4729	8551	4322
6990	6591	8175	7556	8370	19264	13866	23228	16966	19601	15411	11912	7547	11928	8610	15067	9644
23231	6590	10909	10368	21951	6534	26456	6650	2511	9616	10543	5238	13302	6065	22986	6721	27239
4853	6583	14649	14887	14683	12435	23550	17331	7110	17470	13561	8148	12498	13164	19971	13055	16144
58485	6578	3306	2828	2641	4921	3356	5347	7387	4024	3347	4750	2556	4418	2892	4708	2949
427	6576	6031	7410	10820	5196	12659	10805	5303	12634	15562	10583	12252	7458	13258	9902	10405
27032	6576	7032	7997	8877	8661	11805	12235	6474	11051	9086	8497	7872	8912	8826	8795	8188
3187	6571	7695	9463	6451	8790	8888	11346	7566	6797	6156	6523	6519	9723	8108	6820	6469
8662	6567	6740	6704	5498	7921	7754	10247	6062	7861	6457	7001	4940	7727	5632	7169	5921
10730	6561	9599	9294	8817	10179	12003	16754	6129	13068	11308	9073	7829	12044	9816	12022	9685
22800	6557	7102	5469	8058	8243	16002	7109	4890	7099	8114	5147	10744	5181	8874	7182	9756
204	6552	6946	4609	4780	7270	6435	11282	8226	6271	5971	7163	4831	7077	5496	6745	5371
7150	6549	4812	6115	5103	4491	6292	7930	5555	5430	4638	5040	3928	6246	5131	5924	5136
1351	6549	3315	2762	3140	4328	3641	4486	5685	4520	3724	4666	3383	4777	3443	4641	3547
7913	6540	7234	6984	4629	6903	8859	9997	4557	8372	6363	4639	4712	7695	5809	7846	5063
6400	6531	9473	10032	8727	10231	15849	17947	6897	15958	13234	8647	8295	14168	11302	14167	9772
8076	6531	4879	15431	9793	2993	13327	1002	1527	3801	8122	3686	16587	1953	3575	4614	20673
2037	6517	12651	16112	30148	11352	39520	12786	6174	8840	11333	7658	41094	15476	29499	10921	33362
51100	6508	8593	7397	9421	9078	13638	14886	8073	10606	9514	7383	9443	10072	12478	10317	9368
310	6501	5744	4509	5334	5832	7718	8774	5856	7170	6555	5605	5197	6874	5516	7020	6004
51430	6498	9030	11140	18858	3053	25212	5200	2848	3599	4735	3329	24174	4812	15952	4261	25504
392	6496	8240	7050	3206	6508	4357	7924	4974	7027	4919	6975	2497	8467	5104	9844	3704
388	6495	10129	17116	16838	15696	9799	18068	11908	15300	13303	12211	4210	12791	7315	12526	6773
1301	6494	19634	17569	93874	22977	141001	27647	21607	9194	32288	11061	79879	4080	89661	23859	82797
3489	6491	3372	4850	2220	3746	2167	3737	6955	2507	2719	2561	1960	5175	2865	4323	3375
6301	6475	10279	10157	9063	13544	12750	16838	7159	16269	14626	12324	8296	13461	9630	16197	9967
23187	6475	8363	10105	13773	8046	19477	9761	8784	6822	8465	7107	12476	8595	12732	6927	14100
51569	6473	6357	5283	4582	6311	6901	9402	7172	6114	5612	5525	4223	7269	5686	6763	5052
5869	6473	8080	7269	8895	8835	12549	11671	8523	9626	8705	7779	8298	9016	10118	10834	9375
4714	6471	3688	2281	2740	4082	3209	5389	7424	3787	3784	5398	2781	4069	3079	4402	3387
55069	6470	7187	6830	7109	8075	10934	10308	7185	7908	6819	7199	8170	7954	8659	8666	8321
381	6468	4582	2843	3701	4469	4104	5311	7130	4252	3680	4909	3998	4747	3651	5177	4673
64853	6451	6074	6216	4280	7232	6254	10487	6398	7439	5721	5847	3639	7192	4938	7087	4891
3073	6450	6350	5787	9378	8552	14488	9644	7657	8712	9636	8860	9613	8120	11255	10999	12712
22943	6440	4894	4062	5615	1911	5794	9194	10828	9235	10603	2941	7094	3744	3474	4415	6174
81606	6422	13209	6674	15447	13332	34204	12244	11340	6760	8186	7414	23762	10645	21158	13196	23491
9061	6418	5359	4353	7621	4657	10720	6476	5127	3617	4360	5734	7027	5449	6625	6885	7383
57179	6411	8340	5776	5820	11750	10291	14562	11094	8954	7605	8512	6701	8179	7215	8689	7097
51465	6411	7386	4721	4078	6722	6348	10103	6795	7761	5879	6179	3969	7149	5033	7757	4727
7494	6406	6467	7157	5206	10503	7615	11352	6965	8813	7065	8143	4685	9600	6056	10274	5299
163	6404	11040	12744	14306	11878	19257	17455	6261	15071	12482	8755	11921	12583	16053	11700	16411
5238	6402	7910	6699	4809	7033	6820	13045	6565	7703	6452	7290	4037	9174	5596	8102	4609
1822	6401	6476	7557	6824	5971	9415	6804	4831	6619	5183	6090	6784	7449	8784	6963	8124
170954	6384	6532	6873	4859	10244	6811	13301	11399	12898	10424	12943	4430	9959	6818	10790	5998
51339	6380	9030	6393	2572	6697	4935	9591	6328	8594	5231	9015	1716	6688	5514	11184	3022
23345	6380	9632	9387	8339	7696	13268	14203	9899	14087	12890	7579	8337	9457	10008	10058	10261
90480	6372	2273	1549	1360	2318	1482	2739	5505	2155	1966	3115	1346	2548	1234	2775	1929
100287932	6369	3667	2637	2837	3722	3514	4937	5519	3494	2956	3804	2666	3802	2863	3883	3338
6713	6369	5245	4870	4263	5018	6151	7196	4002	6314	7432	6509	3291	4713	3774	7292	3082
51187	6361	4760	3821	3341	4983	4728	6447	6314	5620	4403	5150	3538	5375	3898	6263	3841
23215	6358	8708	10136	7688	7214	11021	12511	6250	11693	9562	7009	6064	10302	8624	9991	7967
29968	6358	7738	8330	4900	13215	10974	12011	10384	17819	13767	6977	4448	13339	5418	16387	5798
3716	6357	8251	10660	9717	8989	12051	11162	5614	9623	8210	6333	7977	9772	10034	10299	11183
5829	6329	6371	5769	6362	5817	8663	8064	7438	6801	5964	6113	5965	6896	7817	6426	6991
27102	6328	5409	5049	5004	6573	8477	7843	6630	5938	4992	4897	5154	7128	6613	6234	6304
5834	6327	7548	6800	5246	10449	9169	12284	7650	11235	9659	7087	4622	9369	6925	11277	7604
7132	6326	5787	6131	4510	5607	5252	8067	5389	6835	5162	6083	4419	9556	4946	6852	4678
8894	6322	9504	7607	6919	10901	10336	15857	8753	11859	10284	9127	6238	11706	7673	12580	7680
2222	6320	6209	5912	6411	9152	8085	10202	5585	11741	11904	10715	5261	6493	5986	10444	5168
9967	6313	7587	7341	7131	5853	8657	8239	4533	7045	6500	6297	6335	7352	7009	7925	7420
5687	6312	5066	3806	3891	4594	4305	8025	5000	5255	4598	5637	4050	5979	3758	5793	4096
7324	6309	5648	4388	4029	7745	5470	9844	8886	6351	4996	6934	4431	7079	4588	8543	4633
1969	6308	6529	5845	9573	5754	11242	8635	4449	7313	6942	5508	8611	6089	8059	5394	10020
6917	6299	9023	8004	6335	11559	11082	11702	7372	12656	9315	7428	6045	10690	8309	12823	6994
51374	6293	4453	2966	4751	3716	5982	4922	5278	4845	4863	4766	5397	5146	5428	5375	6982
94274	6290	3748	1195	176	3902	375	3463	8271	3321	2368	4822	169	2223	490	5105	539
54386	6288	5009	4975	6170	7106	9345	7715	6058	6498	5690	5031	6160	5821	7256	6202	7600
84935	6288	6492	2061	381	4170	711	12217	11866	3449	3169	6002	140	5305	3119	6906	506
27089	6288	4030	2434	3678	3966	4178	5163	7316	3485	3841	5138	4220	4304	3573	5066	4707
6744	6278	9037	8023	7081	11363	17273	19701	10015	21651	17508	8185	8509	9791	10053	12881	8875
10346	6275	6986	7133	5333	7534	7672	10534	6820	10463	10750	9647	5621	9990	7531	8947	7098
26099	6267	7649	6825	6227	6954	7940	11003	4889	9370	7451	7448	5204	8772	6255	9199	7333
6443	6266	5413	6717	7690	8525	11693	11628	6354	10473	8664	7028	7532	9096	8903	8493	8210
144348	6258	7673	8381	10670	6364	15653	8428	3986	6481	5958	4781	9265	7881	10519	7008	12208
1912	6258	6767	5146	4862	6151	5761	8353	5706	5659	4756	7593	4558	6185	5491	7535	5849
2664	6255	6571	6312	6077	9590	10472	9936	8584	8414	7298	6197	5434	8853	9307	7434	7340
1514	6248	4232	5054	5348	3847	5079	7049	5176	5301	7943	8866	7225	7184	5109	5783	4759
191	6244	5221	4513	4962	5508	5873	7588	5137	6921	6499	7689	5061	5707	4868	7076	5874
10059	6244	6132	5206	4429	5130	5473	8619	5658	5431	4647	5178	4006	7095	4996	6190	4708
2224	6242	4473	4780	4641	8291	6821	8392	5682	6393	9484	8862	3928	5548	4254	9189	4391
4678	6240	3550	3564	2712	2464	2726	3653	3248	2399	2199	2601	1844	3785	2460	3053	2557
9802	6239	6758	5880	6497	8001	8676	8873	5553	8873	7499	7405	7341	8755	8325	9381	7529
8943	6239	6905	8358	7434	7393	9104	9614	5089	8763	7848	8336	7055	8307	7960	7751	7717
3608	6232	8010	6886	7590	6212	8246	10318	4706	6845	6262	6552	6066	8032	6574	8537	7843
114801	6226	7941	11143	2404	7847	5809	21295	3274	18855	11320	8762	689	16372	4736	7490	2786
26018	6222	4982	5594	3852	8035	7741	7743	8169	4125	5231	5495	3508	8675	7412	8529	4202
26234	6221	6507	4078	4240	10682	7507	8365	8909	7011	5336	5751	4683	6829	5164	8011	5021
2317	6221	14549	12533	15613	10028	16413	20805	11500	26624	29342	13249	8345	11900	17089	15750	14047
9805	6219	11122	11206	11814	15248	18556	16826	6555	15962	13385	11109	11568	12229	15757	13802	15991
6455	6214	5536	4532	3159	5085	3455	6963	4723	5518	4352	4580	2279	6131	3136	5538	3478
4659	6214	9747	8842	7449	7177	10215	12528	6141	9140	7181	6625	5435	11349	7193	9763	7760
5524	6213	6922	6367	6800	6305	7513	8229	5217	6593	5814	5814	5274	6822	6829	7103	7669
1739	6212	14273	11241	25864	7183	53979	9767	5330	10297	18885	7233	25437	7953	30840	9678	39209
9555	6204	4666	3799	5138	4991	6566	6559	5386	5259	4879	5316	5267	5042	5766	5112	5555
25996	6189	6800	6104	3951	8893	5497	14409	11574	9764	7995	8323	3318	9928	4188	9903	3973
996	6187	7208	6649	4292	5744	6417	11097	4848	7772	6185	6001	3790	8211	5089	7672	4625
3157	6187	8325	5719	5370	7083	6650	8828	3886	8782	11802	12700	3943	5768	5149	12105	3866
51148	6175	6878	6549	2005	10716	2757	17854	9918	9707	7427	10987	1303	15291	3594	12446	2680
57410	6168	4510	4184	3538	5205	5319	7190	6121	4914	4390	5749	3270	5940	4009	5123	4067
5691	6162	2962	2323	2747	2869	2955	4057	4823	3193	3350	3795	2756	3485	2353	3570	2995
64083	6158	5537	4716	3703	5929	6003	7766	6535	5778	4389	4485	3485	6360	4836	6352	4180
5868	6152	5999	4048	4874	6617	7956	7983	7001	6120	4946	5048	5680	5912	6518	6294	6161
28972	6140	3680	3674	3742	5853	5377	6187	6477	5041	4445	5068	4297	5439	4460	5376	4128
83892	6139	8208	5950	4158	8838	6642	11044	6026	9376	7131	5876	3368	8649	4485	7098	3762
6625	6137	4204	4787	4488	4526	5370	5021	5722	3715	3845	4419	3925	5253	5412	3753	5050
5728	6131	6913	6472	4459	9505	6502	10413	7428	10579	6576	7862	3665	8548	5944	10268	4821
53838	6125	4144	3222	1906	5349	3783	7809	7175	4599	3758	4858	1928	6476	3034	4774	2215
4710	6121	2686	2088	2240	2940	2684	4131	5889	2620	2424	3569	2612	3302	2640	3477	2591
112574	6115	5350	5573	5185	7132	4314	12091	6569	10781	5843	7086	4529	8611	4743	8059	4907
6303	6109	6122	5620	11246	5948	10972	5491	8412	3593	4851	4190	9454	3205	13591	3934	12311
55845	6106	7961	5981	6755	9408	9103	12805	7865	8685	6908	8903	7499	9523	7805	9088	7932
4338	6105	2947	2482	2549	3609	3701	5406	6583	3658	3225	3346	2959	3178	3064	4149	3231
6434	6094	4777	4937	3807	4667	4240	6111	4547	4079	3296	3862	3370	5863	3805	5131	4005
5376	6088	4402	5067	5300	4212	5255	5842	4554	5814	4784	5891	3745	5473	7256	8070	5346
1176	6084	4918	3934	2515	6114	3972	9324	9770	7119	5089	6336	2402	6355	3328	7001	2748
51449	6082	7092	8135	5635	11900	9061	17143	8198	12635	10109	11261	5415	13874	8529	13657	6689
440	6075	6566	5829	3060	9912	6249	8574	7903	12142	7447	5182	2726	8820	3715	9574	3674
9859	6073	9264	8430	5657	6697	9526	12400	6147	9308	7288	6211	3823	9450	7366	7827	5524
57575	6070	20146	16099	21288	23828	40301	40155	9663	55876	41710	8394	21349	23147	22448	21076	21803
6888	6069	3444	3637	3682	4054	5119	5544	3709	5918	5042	4260	4233	6610	4145	4650	3978
5562	6065	5630	5254	3340	4834	5324	8871	5971	6826	5183	4657	3460	7988	4773	6836	3960
169611	6056	2536	1621	992	4419	1544	2552	1638	3854	953	6358	1745	1974	1045	8077	1445
81539	6054	7036	6859	6281	7369	11097	8042	5014	11833	8702	7642	6049	7654	7508	12293	7637
64834	6049	5010	4510	4080	5537	4784	7839	4824	6909	5216	5768	3147	6660	3864	5772	3898
694	6048	4307	3869	2748	4203	2730	6213	9517	3546	2585	4281	2414	5848	4004	5183	2825
2876	6046	5357	4612	7019	4867	5891	5564	5802	5648	6639	6696	7769	5756	5737	6046	8658
8531	6043	3549	4680	2771	7479	4056	5789	7705	6795	4604	4866	2306	5776	3601	5449	2380
10418	6042	9139	8975	25901	372	22464	138	276	113	1489	1101	19351	836	29594	900	34674
3336	6033	2751	2028	2035	1818	2107	3876	4120	2706	2574	3613	2082	3052	1783	3093	1908
8667	6033	5717	5372	5597	6732	8102	8020	5219	6345	6015	8137	6615	7072	7245	8304	6575
5859	6027	4495	4629	4002	5278	5467	6175	4818	5311	4920	5344	3782	5429	5076	6406	4748
10213	6025	4310	3328	3640	3950	4418	6702	4553	4378	3706	3892	3267	4630	3377	4561	3896
3480	6019	6741	7048	5684	5245	7356	7547	4115	7312	4672	5976	5449	6038	6065	6216	5723
900	6018	5977	5345	5337	7866	8467	7732	6893	5716	4733	5590	5338	6435	7457	6311	6505
221749	6017	8094	3267	3716	5651	7538	6909	7007	7405	6082	8470	4370	5320	5222	7880	4655
4493	6016	2170	1575	876	1238	1160	2740	2906	2184	1896	3949	645	3188	1941	3097	945
2191	6013	11432	9082	3641	6093	9970	10559	6403	7507	13774	10783	2261	8710	9576	10585	3968
3093	6009	5583	5134	3834	6022	5463	8331	5574	6728	5326	5038	3415	6329	4452	6180	4169
1476	6006	2574	2761	3065	3801	3204	5415	7660	4882	5157	6323	3719	3460	2770	4626	2500
5782	6004	5678	5564	5716	6244	7510	8396	7293	8084	7601	6427	5232	6063	6288	6418	5748
5501	5993	5871	5614	4909	5514	6420	8167	4378	6736	5127	4798	4839	7355	5180	6710	5996
65264	5986	8804	7453	7304	9044	10386	11730	4999	9541	8559	6442	6864	9885	7690	8759	8787
9375	5984	8677	10394	9269	11179	13452	17396	4578	15050	11041	8911	8038	13727	10442	12858	9699
9616	5980	3835	2722	2985	3830	3976	5609	6298	4469	3628	4457	3116	3958	3343	4411	3565
2113	5977	7856	5834	2447	6573	3847	10729	5465	12269	7627	7031	1949	6384	4019	8484	3225
7078	5975	9412	8421	13235	4573	35157	11818	7256	3786	9904	8891	32756	5185	14334	8658	18981
10204	5974	3934	3013	3124	3994	3667	4923	5587	4029	3341	4454	2939	3821	3030	4279	3302
9060	5964	8440	8213	2534	13580	7062	21374	6004	16004	12022	9964	2358	13361	5004	10905	2819
23645	5961	4332	9480	7396	5228	3484	6776	5900	10418	6677	6116	2631	6656	4554	6083	2666
5245	5950	4258	4118	4510	4801	4940	6558	4238	5158	5375	5847	3623	5358	3600	5881	4676
9747	5939	9606	8743	10246	9787	24127	12155	7211	7883	8275	6543	12795	8867	10785	10507	10410
57062	5933	6164	6563	6448	7959	9917	11720	5736	10540	9908	8408	7202	8255	7312	9572	7713
6856	5933	5466	5719	5211	6454	7150	9267	5653	8618	6163	6513	4908	6711	5368	7412	5120
90843	5931	3905	3444	3136	5216	4388	6848	4748	5265	3808	4798	2618	5233	3757	5905	3266
2802	5930	6391	7280	5827	8355	11056	8153	7070	7320	7226	6413	5289	8505	7005	7087	7297
8394	5924	6384	5831	4829	5722	6012	7949	5948	6074	4715	5429	4049	6964	5252	6992	5122
29979	5921	7905	7559	6396	9744	9885	13787	5379	11483	8560	7202	6167	10410	7838	9281	7433
23463	5920	6256	7667	5642	7875	7948	11578	6528	10681	9007	7064	4673	8448	5992	9451	5666
3376	5917	11404	14838	8967	16071	15138	18997	6832	20674	15933	10303	7468	16882	10401	17013	9542
116150	5916	5443	5073	3895	5333	6284	8377	5540	6197	5025	5157	3769	5982	4778	6972	4278
11259	5915	11774	5537	3534	10547	8660	13399	6321	6626	5400	9525	5425	7787	6248	11946	4101
1022	5914	3475	2695	1974	4481	2736	6583	6345	4045	3016	4436	2034	4956	2116	5116	2210
54443	5911	4441	5734	2149	1790	933	7006	2271	5601	2297	3006	847	6289	1475	5743	2029
57136	5897	6426	6000	7614	7029	9125	10972	5604	11745	11127	8445	6734	8989	7108	8684	8247
25	5897	9525	8535	9917	6969	12287	8498	5432	6867	6195	6549	7561	7343	11704	8520	10697
2132	5897	8088	7941	9284	6476	10720	13115	5494	11840	9835	7125	7558	9379	8485	9658	9824
2029	5896	5707	4740	5780	5442	7959	6849	4801	6318	6156	4891	5591	6071	5749	7004	6378
51124	5896	3876	2751	2091	4154	3319	6430	5900	4401	3335	4102	2270	5114	2897	4912	2372
2935	5892	6583	7068	5959	7797	8448	10344	4713	9260	7384	6609	5358	8260	6117	7460	6347
23435	5887	5985	6307	5396	5523	7783	8264	4464	6106	5302	4846	4954	6857	6503	6113	5636
27316	5882	5721	5913	5118	4138	6402	6770	4431	4602	4205	4338	4288	6363	5720	5406	5329
9908	5878	12957	10356	9556	14284	16336	19563	5253	16316	13176	10952	7859	13874	10999	14855	10808
94056	5872	4521	3101	2949	4534	4455	7619	6342	5596	4740	4427	4965	4105	3541	3666	3758
1287	5870	6100	5303	2633	11267	5864	14491	12264	14029	10578	5441	4098	11144	4760	12789	3525
6430	5863	6273	4682	5176	5003	6863	6295	7190	3515	4512	4940	6081	5984	7065	4292	5267
8775	5862	3933	4049	3981	4847	4968	5501	4712	5892	5005	5779	4027	5295	4588	6585	4540
11173	5860	9135	9968	1509	13064	1648	18709	8119	16099	8812	11421	1228	17813	3229	14447	2072
10540	5854	5977	5852	6640	8052	9610	8772	5799	7140	6974	6598	7012	7241	7886	7579	7969
706	5854	4759	3177	3793	5200	4439	7894	8090	5321	5504	6876	4109	6792	4055	5343	4830
3428	5849	4693	6008	2584	4348	2288	5841	3660	6080	5943	5327	2420	5934	3426	7257	2851
328	5845	4977	4676	5812	4188	6706	6075	3669	4966	4924	5099	4962	5501	5465	6625	6680
3976	5842	10115	11866	30246	6309	29975	8954	9959	2371	7811	4963	23221	6136	26520	2934	20001
6575	5833	6664	4778	2123	10026	4531	9112	5865	16587	13774	12391	1789	7262	3309	10917	2891
23677	5832	5980	5802	4936	5505	5950	7415	4178	6561	4469	5233	3116	7061	4640	6303	4428
121512	5828	4649	4838	2032	5710	3133	10366	4854	9513	5361	4622	2320	8515	2315	6493	2679
387882	5826	5263	3093	1178	5974	2381	7982	5924	7442	4863	6079	931	7162	1761	6071	1524
27248	5822	6808	6467	4889	8156	8241	14246	6642	11495	8275	6756	4969	10853	6394	9060	5954
60312	5818	11483	9506	5340	12082	14026	12104	6264	16027	11908	12479	5764	13743	10449	15526	7212
4698	5817	3521	2526	2845	3748	3652	5152	5279	3689	2897	3522	3492	3996	3323	4279	3392
10486	5801	5213	5695	4077	6358	7568	9731	5875	7739	6346	5317	3462	6400	3559	8237	4425
23052	5796	3884	6441	3900	7232	4416	16029	5986	10515	8091	7844	4197	8948	4102	9842	3684
5606	5795	3544	3609	1598	5421	2448	7475	5585	4782	2809	4227	2065	6305	1534	4642	1577
10988	5795	5627	4439	4175	4510	5351	7874	3943	5399	4729	4755	3618	6193	4299	7312	4651
183	5793	2921	3692	802	5276	849	4552	5278	2084	1112	6907	1363	5141	2452	10548	453
3831	5787	6966	6036	7167	8212	10055	11224	7514	9558	8616	6557	7009	8042	7188	7987	8254
3030	5785	5440	7446	6975	8044	9180	9471	3851	8270	7018	6451	6657	7754	7281	7712	7383
83986	5770	5070	5176	4874	7222	6759	7462	5339	7015	5961	5894	3863	6535	5252	7147	5533
127933	5765	6932	6844	6977	6654	10888	12550	5372	11142	8352	5854	6643	8441	7252	8831	8792
5048	5765	10560	9896	10207	9341	16115	15190	5807	12551	11046	7942	9434	11870	12478	11401	11775
23020	5764	7421	9040	9903	6313	11734	9381	4887	9186	7484	5753	7818	8168	10519	7967	10616
54431	5763	9009	9241	7645	9553	12376	15180	6418	11767	10178	6406	6216	12005	9415	10899	8384
9209	5762	4795	3849	5422	4564	7284	5541	4174	4860	4277	3769	5780	4284	4806	4815	6940
93487	5762	5650	4893	4360	6764	6019	8064	5262	6024	4728	6108	4576	6070	5360	6177	5097
9318	5760	6203	5225	4700	5646	6602	9239	5563	6273	5328	4994	4496	6914	4813	6835	5365
5686	5749	4135	3647	3330	5233	4953	7631	5378	5575	4352	4880	3386	5836	3857	5181	3841
5955	5749	6409	5648	6464	9010	10232	12993	6593	9376	8384	7128	7355	8145	7529	8383	7668
10335	5737	5966	5528	552	10376	1389	11947	6645	12869	7197	7350	381	9357	1389	9311	927
200185	5736	1679	1638	1698	2273	2329	2521	4791	2478	1947	2508	1748	2523	2107	2253	1536
122786	5736	8561	8117	5163	8993	10189	15426	6875	18036	16016	7774	3263	9918	8729	8494	6579
10652	5725	8661	6689	6562	8315	9359	12180	5218	7742	7041	7412	5804	9651	7377	8508	7875
6629	5725	3065	2591	2358	2645	2906	4070	3583	3169	2429	3069	2393	3297	2322	3307	2291
6472	5725	7471	6677	5467	8139	8400	8855	5782	8728	7224	6908	4614	9161	6373	10040	6690
79144	5725	3520	2652	2901	4603	3942	3172	5870	1877	1929	3603	2574	4329	5012	5275	4606
6729	5724	4139	4272	3540	5408	4726	7448	5421	5396	4377	5245	3339	5777	3414	5877	3857
2107	5722	8037	7774	6578	8344	9865	12048	5105	9671	8246	7014	6315	9110	7848	8876	6848
550	5709	2654	3390	3546	4234	4740	4664	5533	4509	4437	4030	3249	3998	3797	3781	3382
527	5707	3187	4277	4055	6860	5396	6112	6483	6558	5325	6687	3925	5734	5298	5571	4240
9289	5696	5038	5355	4427	4306	4677	2339	1754	3850	3444	5501	5157	3238	3986	2778	3527
79709	5677	6865	7978	4261	7557	3816	11290	5877	14360	10936	9766	2516	9702	3467	9500	3542
6173	5676	2752	1467	1898	2194	2566	2829	4619	2250	2377	3654	2510	2601	2286	4235	2378
25814	5673	6019	5844	7491	6577	10349	8262	4190	6214	6075	5868	8637	6650	7386	7001	9031
10605	5668	4728	4135	4314	4924	5670	6316	5328	5175	5037	5784	5099	4958	5016	6236	5165
23385	5664	5864	7822	9584	7093	15213	10996	5191	10384	10021	7037	8774	10004	10297	8343	10362
6307	5660	6729	6088	4706	11764	7992	11290	8199	10821	12766	10777	3630	6146	4595	12021	3420
81555	5656	6683	6710	5295	8092	8286	12084	4645	8818	7238	6544	5057	9404	5667	8146	5814
54480	5654	6920	6431	6706	7951	9719	10758	6287	8415	7877	8261	6155	8950	7326	7904	7713
80777	5647	4485	3812	4458	4267	5638	5888	4556	4639	4987	4893	5141	4305	4450	5119	4771
157769	5642	7845	5791	3885	8367	6569	11137	7542	12454	8986	7984	3732	7601	5254	9325	4483
1175	5640	4038	3506	2948	5453	3275	6921	5558	6174	4661	5868	2908	5412	2655	5621	3285
2801	5633	5724	5695	5167	7402	7568	9226	6853	7135	6302	6620	4536	8217	6408	7694	5588
5594	5629	7309	7317	7492	7899	10478	12085	5071	11935	8648	7489	6937	8842	9071	9112	8313
8795	5627	6723	6588	6167	9412	9406	12704	6558	10604	7632	6731	5432	10283	7323	7462	6611
29959	5626	7159	6284	5368	6955	7251	11552	5241	9066	7310	7361	4478	8328	5543	7711	5082
160	5624	6525	6674	5862	8561	7953	9857	4913	10015	8659	8414	5474	8401	7062	8251	7245
51234	5619	2696	2618	2995	3508	3653	4260	5304	3919	3465	3510	3049	3144	3120	3847	3229
6392	5618	3051	2838	2761	3694	4030	5015	5569	4029	3576	4190	3243	3993	3243	4611	2988
4833	5615	4010	2660	2241	5708	3496	5077	7024	3556	3058	5613	2495	5229	3621	5091	3035
3032	5611	4311	4802	5170	5456	6763	7536	4240	6118	5975	5868	6313	5467	5570	5765	5361
4233	5606	5652	7896	7021	8079	11222	16031	7932	6194	6188	4140	7433	6014	4946	6751	7051
5430	5604	8872	11039	8225	6634	8399	12105	3757	9575	7041	7032	5436	11199	8171	9464	8137
9921	5602	6116	6795	7263	8695	10583	9955	7333	7595	6415	5325	6287	8399	8122	7217	7329
7153	5599	4491	6799	2582	1533	1029	6045	2233	4444	1868	2010	625	6021	1239	4325	2132
130074	5598	10796	8605	7598	9872	11247	13632	4576	11801	8651	8443	6967	9872	8984	10857	8499
30011	5595	4484	5499	2058	6641	3582	9727	5987	9115	5404	3445	1186	7017	3454	5508	2228
7001	5593	5044	3763	5591	6004	6270	7311	6165	4602	4899	6343	7141	4725	5941	5096	6964
56943	5590	3603	2376	2021	3042	2550	5138	5303	2991	2331	3674	2344	3969	2362	3763	2487
5538	5590	3944	5534	5700	4184	5428	6847	4123	8102	7488	5556	5196	4862	6040	6072	5061
1012	5587	11714	7881	2851	19904	7747	42430	17574	49298	30471	15910	5794	22091	5464	21617	7294
10075	5587	8855	12988	12312	9893	15320	13449	5915	13494	10826	6824	8508	10058	11150	10588	12062
9184	5587	4661	4375	3611	3737	4365	6908	4865	5367	3953	4191	3155	6425	3765	5618	3705
1453	5587	5519	4731	5260	6758	7679	7408	6078	6451	5483	6089	5148	6029	6586	6991	7210
54460	5580	2286	1709	2245	2327	2610	3201	5270	2313	2274	2842	2262	2143	2058	2565	2393
6774	5577	8385	8690	10618	6163	11859	8961	4813	7431	7936	6968	10565	7700	12397	9359	12675
26471	5569	5305	4062	4715	5860	7606	4285	8119	6117	6932	7133	4513	5619	4757	9766	5252
7384	5566	4071	3610	3788	6198	4681	6588	4653	5607	4931	6820	3628	5266	3971	5867	4481
3276	5563	4904	3688	4422	4221	4730	5858	4517	4514	4206	4422	3536	5771	3964	5434	5099
10370	5562	8240	11680	8916	17162	12849	20129	6148	16693	10847	10317	6004	16660	7080	12844	7879
51566	5559	6625	7143	8527	14177	13300	18427	8913	11983	11626	8276	7736	10938	9866	10450	8697
55505	5559	3169	2697	2594	4828	2993	6642	6044	5331	4687	5484	2655	3988	2121	5415	2495
81037	5559	4717	5023	5635	6787	7701	8234	4832	7802	6762	5247	4498	6396	5057	5974	6309
4738	5557	4092	3062	3763	5404	4688	6763	6114	4930	4442	5248	3809	5191	3840	5121	4464
397	5556	2857	1192	814	1066	748	3359	3072	3354	3097	3317	1519	1855	1012	2364	991
10552	5537	4733	4496	3554	5754	4857	6817	6076	5412	4396	5630	3001	5609	4196	6018	4094
5516	5527	6964	5900	7552	9096	11739	11334	6522	10030	8767	6839	7111	7608	8735	9226	8976
11328	5523	9490	10172	6251	11072	9206	15447	5622	13192	10405	9959	6460	14090	8247	13320	7960
3074	5517	6098	6074	7582	6535	9003	9864	5694	12477	13530	8543	7648	7361	8090	8356	8961
6921	5515	3754	2746	2892	3837	3772	5864	5989	3857	3451	4191	3110	4172	3077	4269	3367
7319	5515	4533	4712	4757	5965	7402	8872	6525	6343	5183	5030	5046	6182	5463	5984	5192
112597	5513	2435	2237	1937	1956	1172	3457	5120	2243	2343	2913	1274	2958	1294	1594	626
27173	5513	4768	4917	4541	4316	4951	6203	3521	5096	4587	5108	3837	5122	4154	5720	5047
10960	5508	5195	5122	7679	5135	7469	7256	3916	7237	6998	6039	6192	6812	5824	6145	8798
60626	5505	5172	5036	5424	6403	7684	6747	5013	6567	6207	5602	5230	5624	5434	5683	6901
5201	5503	3714	2602	3587	3595	5205	4047	4561	3144	3030	3877	4183	3819	3776	3443	3955
5962	5501	7484	8252	8291	6003	10242	10237	4050	8582	6949	6378	7259	8149	8537	8154	8603
533	5498	3352	3535	4411	5253	4892	6404	6724	6398	6159	6610	3922	5075	3861	5226	4216
6204	5498	3240	2070	3137	2903	3281	3816	4558	2939	3326	4982	3184	3495	2888	4272	3531
2987	5488	5744	4158	5842	7555	6519	8521	9373	6434	6902	8647	6473	6454	5693	6901	8090
8871	5487	5529	5411	3244	4770	4488	6384	5022	6582	4209	4297	2542	5095	5176	5393	3561
10955	5486	7603	10223	6351	13915	11791	20508	6665	20850	14264	9932	5033	13588	8036	12979	6657
7037	5485	15319	16213	8550	17118	12443	33670	5350	31960	21978	17928	7898	21792	11913	19299	9135
598	5485	5333	5848	6665	9789	11282	10242	5930	10177	9736	6570	7248	7669	6682	7338	7825
9828	5483	8334	9002	6935	10228	8929	12925	8754	11273	9913	9612	6542	9797	7774	11794	8224
22839	5482	6162	6396	5535	9285	8587	9679	7256	10912	8442	7964	5129	6690	6922	7113	5847
64393	5481	8613	8424	9643	12376	15487	14006	7169	12555	9938	9379	9681	11032	11216	11495	10688
91252	5477	4023	2912	2091	6516	4794	7472	7124	6097	5690	6185	2624	5997	3755	5850	3680
23256	5472	3813	3970	3266	4548	4521	7764	5474	4871	3849	4421	3165	5779	3665	5532	3385
10772	5470	4108	4989	4004	4206	5642	6090	4915	4711	3760	3698	3630	5599	4974	4632	4118
100505641	5462	6686	6075	5773	4698	8295	7761	5355	9257	7758	5426	5932	6700	7265	8349	7683
3148	5462	3014	2716	2792	1665	3372	2431	3298	2295	1377	1903	2285	2911	2172	2871	2942
56951	5461	4843	5321	5515	7870	9015	11146	5780	9031	7916	6265	5294	8730	6667	7549	5660
83641	5458	4458	2521	496	4504	1433	10942	8276	5971	3096	2878	799	5167	980	5600	877
8242	5457	6481	4461	4210	4507	5897	9504	5795	7348	5899	4989	5694	4543	4681	4297	4718
6902	5455	3870	2840	2926	3780	3725	6237	5609	3934	3214	4637	3745	4531	3553	4366	3472
103	5451	9674	11642	9321	7845	11683	11650	3930	10255	11774	6425	7686	9261	11022	10178	12673
57326	5449	7157	7573	14063	8734	19541	8332	6888	6177	7377	7677	11974	6757	12730	8598	16413
128866	5445	5111	4477	4501	6002	6065	6728	6339	5402	5091	5211	4894	5577	5265	6100	5377
11078	5440	5851	3611	4055	4966	5673	7687	5495	4384	3949	5264	3873	7077	4301	6171	5761
27436	5437	5601	5297	3345	4886	5066	7346	5728	7478	5505	5275	3225	7734	5351	8738	3831
348235	5436	3214	2537	2043	2888	2720	3901	3358	3350	2482	3262	2414	3108	1988	3903	2088
2287	5433	3752	3022	3828	3565	4113	4970	4657	2995	2842	3415	3545	3388	3265	3868	3929
26090	5432	3053	2743	3220	4755	3909	4869	5265	7156	7201	7245	4172	2847	3225	4201	3575
10801	5432	9193	9161	5353	9981	5962	14632	5137	12593	9371	10593	5124	11132	6628	10584	7279
90102	5429	10323	9127	5108	13514	7578	14813	7245	13182	11601	12755	3747	9535	5037	16059	5625
8565	5429	6055	6753	4936	8818	7548	9533	5408	9530	7299	7846	4666	8643	5499	9474	5451
1808	5425	7347	7577	11565	5772	9658	7869	5004	5249	5683	7120	11372	7937	8106	7845	9001
23543	5421	10108	9975	7207	10424	9870	15038	5862	11536	8452	7959	5182	13187	7061	12063	7452
4053	5419	16418	25095	54535	12200	113510	20411	9079	9539	23683	4429	50190	20715	60941	9400	40851
51246	5415	4398	4920	4103	6863	4773	6660	5561	7306	6331	6362	3917	6191	4563	6718	4819
10150	5411	6827	5985	7350	4985	9694	8968	5224	3499	3659	4342	7037	5921	7172	5844	8559
2519	5410	3616	3381	3473	4163	4618	5847	3777	4753	4187	4151	3511	5876	3777	5404	4251
7322	5407	4900	4291	3869	5276	5223	6812	6083	5286	4195	4462	3808	5138	4294	5705	4457
6385	5406	5505	3863	4941	4115	6916	4743	2920	2119	2558	3970	7836	4517	3864	3164	4300
6609	5404	4826	6182	8773	7093	11070	8698	4425	8575	8544	7017	9767	6885	7849	6669	10705
8087	5404	5791	5748	5991	6665	8368	8960	5527	6844	5902	6309	5195	6982	7022	8373	6610
10670	5398	5987	4630	4591	8098	6080	11459	7319	6853	5065	6882	4597	6975	5134	6369	5064
11325	5397	6549	5634	5630	5550	7963	7806	5176	5789	5368	5347	5221	6540	6367	6410	6121
91289	5395	3100	3960	3042	5608	3934	5431	5731	4294	3504	4147	2710	5396	3426	3802	3529
10123	5394	9463	9655	8721	10057	12021	7939	3152	15880	14878	7949	4712	9048	9703	8279	7159
84962	5393	4996	4797	4657	6414	8014	6509	4613	7889	6800	5494	5009	5990	4305	7413	6332
79143	5392	3306	4121	4093	6349	6119	5761	6030	4735	4231	5434	4466	4924	4307	4150	4871
22826	5387	4870	4350	4806	5343	6070	7527	6123	5674	5344	6223	4928	5530	4825	6689	5182
10055	5382	7079	7162	5671	5820	6270	8761	3389	7187	5793	6575	4385	8588	4744	8052	6025
1857	5378	5819	5954	4738	6985	8017	7261	6092	6533	5306	6527	4371	6912	7304	7359	6180
55700	5374	6961	7168	7504	8042	10831	8820	5038	7064	7251	6993	6256	7502	7218	7265	8471
9097	5372	5725	5382	4024	5528	6362	8855	4321	7202	5517	4231	3737	6383	4562	5811	4473
90550	5365	5139	3508	1338	5772	2049	7982	5623	6437	4053	5036	1137	5373	1815	8118	1485
26227	5361	6076	5471	2245	6014	3204	6194	4785	6911	5273	5034	1460	6863	3122	9433	3087
2783	5358	5778	5180	4660	7612	6159	7323	5652	6362	4805	6610	4741	6873	5644	6565	6234
2879	5354	3658	3224	3547	3547	4428	3342	3913	3157	3109	4523	4017	4144	4880	4820	4320
23264	5354	9600	8720	16773	8008	30780	7993	3540	8315	10879	5837	21169	7273	16004	7590	27277
1535	5350	1246	956	526	2297	455	3309	5011	2938	2828	4284	993	2810	784	2706	932
4201	5344	3447	2541	2820	3632	3200	4926	5262	3264	2861	4141	2790	4010	2693	4024	3197
9341	5343	6449	6338	5844	8938	8916	10791	5613	9586	9050	7715	6420	8400	7331	9214	6923
7307	5343	3185	2444	2002	2250	2503	3160	3339	2188	1721	2542	1982	3000	2164	2707	2187
9823	5334	4361	4580	3376	6801	4918	10282	7398	4197	3744	4485	2240	7274	3993	6051	3644
51088	5334	7315	7097	5621	10906	13265	9930	4171	14947	10276	7147	7010	10686	7901	11918	8858
57214	5333	6872	15461	686	28197	3292	24331	8342	17331	9993	14049	251	29098	5122	13343	663
2683	5329	5679	7711	4740	6839	7851	9618	4860	7445	5694	5693	5854	6164	4435	5937	3856
5211	5321	9436	7182	7820	10993	9947	13443	7851	9593	8023	10341	9110	9715	9400	9365	10028
9898	5319	6343	7141	5940	5184	8128	8425	4356	7539	6156	4975	4912	7775	7003	7134	6872
4257	5317	1312	2497	1863	2682	1354	2416	2158	1119	901	1995	2384	3301	966	2456	832
10241	5314	4177	4192	2954	8263	4668	9943	8061	9689	7542	5153	3004	6311	3604	7625	3730
1469	5313	1921	391	84	2164	129	4157	4437	2054	876	49	6	1091	23	620	11
4953	5313	7024	5307	9418	3510	10344	6345	2834	5371	3870	5842	9023	6718	8790	7142	10656
6880	5309	3555	3038	3189	3639	3750	5477	4369	4237	3632	4431	2713	4289	3119	4868	3127
8898	5304	5662	5166	3626	7258	4990	8208	4827	9890	6002	5505	2348	5899	4455	7732	3695
10640	5301	6281	6329	5010	7345	7491	11866	5894	9491	6612	5646	4174	7626	5899	8197	5626
51060	5296	3604	3427	2851	4328	3729	5850	4767	5001	4421	4337	2907	4470	3110	5340	3275
5704	5293	3203	3134	3415	3844	4489	5187	4945	3837	3523	3826	2939	4245	3559	3646	3646
1647	5286	3742	3381	4421	6259	6361	5441	6556	5653	6097	5873	4216	4792	3917	4869	3294
1434	5284	5098	5682	4611	4160	5607	8265	3725	6211	4559	3991	3647	6124	4001	5813	4960
51639	5284	3721	2486	2698	3370	3273	5038	5018	3977	3163	4434	2540	4149	2816	4810	2982
51747	5279	3620	4167	3917	3612	7233	4401	8800	3005	3670	4340	4731	4213	7595	2883	3962
1429	5272	3220	1719	1777	2320	2743	3720	3338	2227	2096	1586	1795	2619	2552	3821	3801
6510	5271	3923	7388	2402	6992	2624	9307	5422	12786	8112	6586	1092	8115	1779	14238	3311
9130	5269	3510	3378	3019	5621	3939	5249	8015	4499	4340	5468	2622	4193	3503	5106	3337
63875	5269	3468	2465	2365	4826	3390	6528	6622	4096	3610	4665	2207	4793	2656	4481	2845
80854	5265	8750	7731	6025	7844	11188	12867	5116	11699	9428	7865	5540	8722	8600	10367	6750
60481	5263	7109	8118	10199	6695	13458	8477	4018	6864	7532	5213	9278	6257	11764	8231	11801
51094	5259	4591	4392	4357	6027	6353	7634	5395	7236	5947	5643	4317	5853	5716	6671	4774
404672	5255	3328	1986	2563	2779	3525	4173	4098	2920	2452	3686	3547	3117	3126	4559	4028
5917	5254	5017	4972	4317	5158	5604	8265	4248	5625	4998	5208	3645	6757	4079	5954	4364
56910	5253	8256	6519	5756	7505	8635	13442	5072	8146	7101	6067	5437	10115	6417	9561	6721
6541	5252	7174	6228	5997	5333	9272	7760	3816	10998	7265	4864	4411	6784	5481	7040	7439
28974	5248	2269	1993	2483	2830	3229	3393	5685	2381	2362	3547	2347	2933	2701	3306	2884
6814	5247	3006	2827	2647	2931	3268	4759	4497	4028	3171	3477	2590	3865	2625	3754	2568
6046	5244	6841	6926	6790	6298	9229	8286	4639	7200	6044	6240	6755	7571	8138	7286	8031
411	5243	4152	4750	3645	5874	5650	11649	7698	11104	8753	4865	3469	5674	4111	7632	3651
25921	5242	4512	5481	5052	5017	6973	7713	4697	6262	5331	4231	3984	6196	4655	5520	5005
57003	5239	6293	6478	6597	6487	8962	10538	4861	8265	6787	6332	5461	7580	6522	7306	6985
29763	5237	2950	2509	1131	7042	2300	6583	7466	5990	4129	4922	1161	4419	1554	5701	1765
6591	5234	2762	4356	1029	2914	1208	5453	3832	3873	2562	3045	355	5699	1588	4137	929
8672	5228	5883	7751	7092	7454	11178	10215	6526	8188	7761	5508	5816	7911	8195	8068	7504
10477	5222	3643	3887	2734	4369	4435	5894	5220	3768	3344	3597	2582	5680	3715	4877	3578
6634	5222	3034	2587	2800	3099	3352	4659	4710	3328	2893	3600	2635	3841	2931	3822	2811
2824	5221	8302	4765	21911	312	15682	386	542	133	2904	2125	22991	683	23810	1198	30022
79971	5215	3607	5294	3861	7137	4639	11083	6816	8292	6451	6818	1695	10297	4278	9142	2375
5931	5214	5607	4366	4113	4021	5209	7290	4526	5482	4874	4760	4598	5226	4393	5728	4737
2321	5214	4460	4763	6949	1772	8561	4971	1295	7220	5985	2250	9969	2638	11751	1858	10199
9159	5213	12697	6283	8343	12537	16945	12973	4522	9043	8172	9746	9008	9545	11668	12230	13069
6533	5211	4349	6171	1771	9965	4732	8824	3973	6280	4812	2885	1596	5742	3610	6168	2832
6909	5205	2651	4335	5048	5462	3629	4969	5566	3542	2489	2621	3133	4892	4442	3322	5037
6641	5198	6172	3919	1384	7450	1233	11957	8509	3544	2171	4446	1147	7654	1991	9102	1183
23071	5198	2767	3219	2754	4252	3869	6236	6066	3951	3044	3153	2678	4788	3091	3555	2668
6760	5194	5394	4664	4724	5057	6804	6946	5217	5187	4610	4645	4488	5725	5801	5750	4931
10051	5192	3959	5498	2351	1877	2249	5526	2841	4015	2792	2473	1455	4755	2335	4063	2284
8793	5187	7083	6161	4888	12385	9955	18626	5224	10565	5942	8182	2794	12767	6200	9067	5858
11198	5187	6033	6298	5172	4325	6445	7942	3162	6510	5194	4358	4400	6995	5084	6848	6049
89796	5187	8966	9264	7435	7525	9545	12740	8884	9151	7144	8440	4677	6902	8220	10354	8297
23480	5185	6293	4519	3115	8718	4021	12446	8045	8105	4635	5762	2767	8741	4358	6943	3274
55859	5182	8380	4082	21130	1111	15876	1782	2806	241	2795	1539	10539	1213	16613	1050	17047
10525	5180	9740	11637	13306	7285	14167	16058	4210	10824	11551	6949	8411	12053	10372	12289	11989
3725	5180	6174	16299	29971	6005	12828	6739	7241	8234	8788	5416	11087	6542	11334	6177	13942
51126	5180	2270	1944	2024	2949	3009	3861	4843	2904	2421	2843	2419	2995	2490	2921	2419
84726	5179	7729	9513	10363	8900	13914	9271	4701	9388	7996	6286	8804	7535	11857	8900	11712
6637	5176	2826	1901	2365	1952	2404	3553	4168	2277	2242	2913	2396	2980	2263	2820	2697
10542	5176	3218	2386	3099	3421	4117	4834	6428	3839	3739	5060	3510	3468	3547	4428	3547
6574	5161	3833	4280	2715	2696	4370	5310	2327	3526	4212	3803	2156	3856	3769	2780	2180
8036	5161	5060	4250	3191	5226	4987	7809	5082	7440	4630	4680	3287	5551	3506	5912	3422
10467	5161	2495	1903	2178	3263	2595	3365	5982	2492	2386	3361	2156	3047	2321	2831	2495
25940	5159	5592	6044	6032	6380	7278	10780	4750	6733	5811	4544	4177	7704	5008	6345	5110
8061	5156	1797	2812	1778	1710	1415	2878	3061	2009	1190	2070	1740	2834	1425	1511	1077
1209	5155	3780	5743	5426	6340	7088	6886	4017	6989	5488	4867	3988	5773	5067	5178	5498
9531	5155	5084	4849	8343	5446	13876	6957	4908	4719	5644	4832	7907	4938	8021	4678	9804
9784	5154	5573	5376	5654	6470	7225	8666	4699	7008	5806	5736	5326	6441	5425	6999	6889
10175	5153	4226	4843	3556	6596	5043	9791	5144	6728	5448	5106	3557	6762	4284	6696	3703
10899	5141	4771	3759	3705	5169	4968	5899	7066	5118	3998	5532	3484	5476	4295	6127	4277
25874	5139	2898	2409	2713	3608	3735	4738	5187	3390	3018	3560	3317	2844	2512	3503	3294
53827	5135	2110	1982	1356	3330	2796	3854	4300	6145	4610	3152	1863	3634	2150	3082	1535
7052	5134	6880	15100	21158	8040	17603	29190	13136	8717	23125	11270	15810	8287	16474	16040	13357
1452	5133	9108	8914	8604	8070	11306	12039	4658	9285	7796	5750	7099	9420	9262	9226	10576
51329	5131	4160	2614	2431	4985	3646	5237	5840	3990	3865	5512	2825	4959	3079	4437	3272
27166	5130	4172	3192	2981	3804	3441	5861	4770	4072	3793	4423	2547	4680	2776	4563	3567
6284	5117	3621	3348	4126	4791	5956	5599	6508	4908	4410	5619	5340	4620	4510	4842	4946
4628	5116	11595	10109	5555	8635	6800	13017	4653	7380	6850	10487	3854	8999	7503	14418	6049
9208	5110	7434	5826	4349	8095	7177	12479	7168	12107	8891	7280	3865	8605	5152	8497	4454
7225	5110	2137	5600	149	9780	304	9044	5806	10695	3531	3454	162	10302	197	7433	355
6742	5110	3360	2435	2415	2697	2795	4456	4064	2929	2751	3101	2594	3770	2566	3724	2708
8467	5099	5797	7252	6114	6293	7210	9701	5104	7728	5818	5476	5338	7754	7013	7767	6657
51604	5099	5819	5902	7102	8657	11317	8771	5803	8847	8085	6726	7048	7313	8186	9166	9067
7389	5099	3513	2817	3324	4243	4078	4478	3871	3092	3417	4411	3355	3792	3193	4703	3785
57552	5095	5924	4854	11719	2521	14322	4950	2143	4402	5317	2013	11853	4279	7971	2515	14938
27018	5093	5100	4791	5027	9903	6713	8813	6593	6632	5023	5890	4435	6546	6267	7404	5943
4897	5089	5484	12680	18325	1091	17385	505	557	203	4875	1620	16116	947	18618	1745	30504
401152	5084	14195	7500	7002	13982	10401	22588	9302	16787	11271	13776	8302	13659	10348	14001	9349
56937	5083	14305	9164	38326	2721	57828	3127	2812	2920	10723	2981	30495	3561	48190	4757	55952
283635	5083	4034	2932	2986	4085	5014	6633	5104	5160	4558	4533	3508	4779	3960	5095	3038
6723	5082	3088	3413	2509	3351	3203	4932	4248	3814	2833	3486	1997	4513	3112	3395	2373
6612	5068	4779	3835	3976	5003	5903	6804	3824	5909	4646	5445	4422	5491	4642	5580	5274
84324	5067	3802	2750	3118	3796	3758	5417	4617	3737	3074	3766	3035	4386	2773	4143	3335
84061	5067	5394	6859	5135	7479	7471	12642	5552	11412	9403	6183	4189	9159	5322	8597	5090
10294	5066	3767	3305	3272	4055	4824	5517	5149	4045	3784	3960	3575	4021	3748	4261	4148
7402	5066	5478	7538	2474	5402	3865	9489	4850	10537	6869	4805	2200	7340	3099	8595	2008
8932	5064	3005	2264	1896	2566	3469	3822	4929	2519	2427	2793	2645	2951	2686	2952	2580
2817	5059	7283	8722	10804	7630	31841	8930	4906	15983	20067	11984	13728	9911	17709	9287	13254
6996	5056	5673	3068	2393	3899	2871	6697	4251	4172	2657	4246	2525	4679	2571	4865	2363
5110	5053	4565	4083	4669	5858	6598	8825	4809	5889	4976	5197	5379	5963	4949	5239	5217
2764	5041	6989	6559	6384	5857	9575	10415	4143	8189	6218	4991	6390	7836	6925	6454	7367
2885	5041	6262	5861	6614	6540	8228	9613	4993	7036	6695	6713	6669	6896	6024	7192	8009
5906	5040	3764	2681	3054	4006	4108	6158	5822	4817	3819	3506	3137	4065	3574	4279	3278
10299	5040	5853	6652	6624	6639	11270	7886	6710	7452	6444	5553	7356	7255	9565	6703	7666
25998	5035	4819	5484	3739	5901	5618	9053	4255	6742	4498	4016	3532	7424	4668	6912	4474
64844	5030	5397	5144	4877	4943	6594	7458	4718	5234	4731	4356	4383	6378	5654	5526	5345
57590	5024	6348	5132	3768	5009	4674	8416	4520	7451	5119	5001	3396	6361	4144	7097	3760
3460	5022	5270	2839	2222	5900	4620	8410	6510	6479	6264	5357	3258	5136	3820	5054	2793
1107	5015	6630	10222	6432	9774	10803	8748	5607	9178	7157	7434	4754	8289	7512	8282	7175
9538	5015	5665	5046	4965	5769	6236	8383	4477	7218	5340	5870	3985	6243	5555	6671	5193
3482	5015	10934	19070	14716	13876	18878	20108	6600	26851	22567	13380	8030	15822	12780	19968	11548
3423	5013	8179	6745	8304	12000	16860	14596	9932	15192	14071	9458	9455	10128	14329	10021	9980
10280	5013	2629	3068	2385	3774	3235	5092	3986	4777	3834	4411	2517	4318	2691	4202	2885
51441	5010	4399	4223	4066	4310	5036	5757	4017	4449	3746	4718	3981	4817	4259	4711	4317
5537	5009	3928	3285	3348	4667	5278	6631	4450	5244	4128	4484	3515	4705	4079	5522	3648
1466	5008	8176	3379	6150	8985	8700	10713	6281	6429	6346	13194	3165	7766	7040	10488	6887
23788	5004	4448	4001	4179	4395	5450	7466	4695	5968	4730	5697	4199	5342	4461	5751	4592
23266	5004	4607	6348	5380	3339	6438	7537	3528	2418	2206	3057	2787	7412	5350	4867	5950
5886	5003	2670	3085	2465	4956	4024	4056	5289	5010	3666	3911	2642	3788	3176	4071	2840
9636	4999	1952	1342	759	2252	787	2645	4367	2412	7777	3812	652	1540	758	3659	2746
4700	4999	2372	1776	2314	2374	2425	3269	3878	2350	2073	2878	2503	2850	2228	3072	2625
23564	4993	3826	2916	4805	2783	5684	2638	3154	2747	3250	4385	4483	3239	4087	4411	6010
358	4988	1489	2945	254	8690	1188	15579	4343	3844	855	2774	772	7521	916	2755	565
10272	4988	10220	7532	8831	15675	16594	15864	15272	23895	24252	19066	11271	10643	11880	23267	14326
3035	4987	3379	3296	3173	3584	3983	5349	4221	3234	2994	3764	2996	3945	2780	3694	3407
2621	4986	7263	9153	17171	15634	26146	14518	13738	14187	23626	16695	17507	10151	16738	12418	18936
27129	4985	4161	2622	641	5421	1317	6071	3895	3305	1415	5263	734	8510	1385	5034	620
8125	4982	4095	4039	3432	4180	4099	5624	3985	4209	3288	4295	2889	4896	3413	5061	3948
5566	4980	3857	4047	4016	5089	5015	6125	5322	4359	3541	3658	3996	4392	4253	4380	4244
5743	4978	4442	10474	2218	4938	1757	7400	5618	2976	1349	3374	289	7083	4642	2180	834
22985	4975	4909	6627	6290	4232	7555	5762	5541	4477	4557	4150	4749	6071	6919	4418	6048
222663	4975	20924	17692	3296	7750	3547	35909	5362	8499	5073	11401	1303	23287	9292	11879	2954
84333	4972	5854	6054	5026	7028	7689	10992	6053	15580	10580	6630	5425	6018	6920	7981	7210
84188	4971	5103	4496	5567	3662	8003	5526	4093	4427	4702	3669	5752	4587	5963	4065	5689
4247	4970	3870	3731	3110	3838	4402	5704	4009	3966	3774	4320	2819	4661	2928	4566	3379
2773	4967	7060	6138	4899	6931	6102	10287	3759	7797	5979	5638	3957	8364	5315	8022	5333
9943	4966	7149	5598	4585	7729	7514	11986	5396	9531	6487	6265	3683	7859	4893	8583	5582
5055	4960	1500	747	8	2796	21	23692	3677	3626	613	599	14	2085	1	511	24
7353	4950	2789	2158	1916	2888	2472	4614	3964	3249	2705	3245	2024	3542	1963	3236	2128
23265	4950	5856	5823	7747	5931	9389	7750	4387	6054	6880	5147	6928	6073	7306	5852	9275
5683	4948	5322	4064	3969	4980	5304	8223	5522	5514	4719	4614	3534	6045	4292	6058	4520
167681	4944	5538	3887	1966	1511	1959	4756	1180	1887	2785	8462	1992	3208	4039	9881	3412
4254	4942	2315	4340	670	5533	753	9782	4487	3971	1602	1822	422	7998	569	3223	661
59345	4941	7541	6797	1695	6621	2317	11382	4478	9377	6542	6602	1320	9246	2798	9550	1943
163590	4940	3147	3840	3371	5826	4729	5476	5247	3926	3465	3582	3542	4177	3325	3866	3617
4707	4939	2042	1208	1343	2250	1787	3080	5635	2220	2219	3027	2173	2283	1424	2694	2011
3615	4937	4583	4522	4318	4824	6086	6225	3700	5561	4675	5617	4146	5816	5962	6158	5055
9703	4936	7365	10438	10970	11637	15795	11983	5340	11506	10926	8199	9701	8433	10547	9186	11200
3911	4936	11932	14474	15519	9380	18558	11754	5426	13357	12270	17313	11635	12706	13662	16499	18617
51155	4934	3128	3026	3108	3409	3209	5364	4238	3263	2465	4291	2447	4452	2517	3705	3223
1212	4930	2937	2143	2646	4531	3436	5501	7015	4193	3776	3832	2785	3219	2369	3818	3255
9612	4926	7554	7716	5412	6943	7712	10717	6667	10083	8546	8318	4169	7970	7905	9206	6875
51776	4917	5951	6637	2241	8887	4088	9794	4211	10880	6863	4668	1853	9168	4085	8124	3013
27338	4916	2708	2612	1788	2394	1539	3775	3591	2894	1911	2748	1135	3641	1510	3136	1938
5226	4915	4691	5045	6646	4709	9614	6512	2665	4224	5297	4203	5545	4839	4970	4666	6114
1994	4914	3549	3501	3078	3607	3947	4770	4236	3738	2803	3033	2712	4032	2990	4034	3089
29085	4910	2888	2268	3505	3707	4363	3530	6276	3403	3556	4634	4201	3580	3585	4135	5077
146691	4909	7382	8453	19233	4558	22939	5805	4650	4268	6346	3466	14487	4806	16918	4332	22580
6432	4908	3604	3779	3220	3454	3671	5299	3069	3423	3033	3834	2985	4716	3201	4210	3338
2804	4905	8171	9034	7945	9528	13015	12194	6501	9490	8128	6440	7642	8419	9214	7879	8484
26017	4903	4171	3384	3937	4116	4830	5828	4465	3936	4064	4607	3452	4749	3650	5350	4287
114757	4897	1107	1356	977	418	686	1631	1028	188	182	1542	494	978	1396	727	811
51602	4896	2478	2356	1843	1858	1954	3689	2623	2486	2017	2768	1469	3122	1685	2871	1661
7259	4895	4533	4714	5378	6697	6605	6508	4752	5878	5050	4662	5639	4889	4963	4969	5559
9043	4893	8235	7117	6114	7078	9798	12243	5744	10957	8784	6528	4880	9143	8957	8834	6514
22856	4890	7189	5853	3905	4800	3902	10683	6474	6070	4524	6516	2955	7748	4930	5725	3923
1760	4888	4851	4038	2038	10148	4022	9176	9398	6914	5919	8128	1896	8397	3306	8511	2628
6526	4887	7717	11640	20898	10814	24325	8916	4575	6743	5747	3867	12406	9364	19819	11737	25042
51699	4885	3575	2463	2583	3527	3614	5572	5523	3463	3693	3824	3043	3833	2725	4553	3274
2539	4883	3192	5107	3964	3142	4088	3998	2167	4002	3420	3325	3765	6358	4034	4115	4141
6566	4881	4871	5689	9059	3983	11704	5151	3041	3817	4303	4287	10416	3899	7863	4107	9681
58517	4881	4475	4779	3960	3685	6132	5083	5231	3547	3670	3975	4053	4990	5667	3611	4333
6830	4877	6811	8431	7957	6772	10316	10650	4783	7602	7200	5819	6049	7998	7423	7005	8501
5903	4867	6427	8129	8050	6419	10967	10832	5441	9063	7881	5976	6548	7827	7722	7954	7539
3636	4866	5633	6396	6710	8072	9500	7581	6691	6640	6510	6421	5564	6999	8369	7146	7322
3814	4866	370	140	386	2091	876	3574	10099	2171	5125	1961	196	518	921	2910	1770
5062	4865	6388	6319	5470	5961	7642	8985	4424	7727	5917	5936	5085	6411	6682	7530	5773
51398	4865	2980	2290	3125	3556	4099	4478	4671	3927	3300	4020	3471	3833	3300	4100	3850
9798	4862	5525	4584	4678	6191	7504	7564	5070	5803	5029	5285	4501	5829	6018	6401	5314
347733	4861	6438	5742	19094	401	17364	262	352	71	2202	905	15381	528	13702	704	22661
7175	4860	6973	8627	7476	5745	10265	10240	5729	7234	6670	5806	6198	8155	8580	7572	7562
4646	4857	5078	5258	8518	6225	9519	7504	6208	6779	5446	4623	9272	4799	9494	5727	9040
55749	4855	3826	4215	3791	2904	5166	4920	4307	3280	3230	2835	3142	4263	3943	3086	3631
10262	4854	2503	2746	2089	2469	2770	3562	2805	2790	2114	2576	1818	3347	2374	2944	2290
4259	4851	2625	2450	2191	4660	3037	4451	4566	4110	4105	6450	2933	3886	2680	5065	2287
7385	4849	5912	4916	5022	6523	7262	9949	3502	7606	7240	7000	5587	7447	5755	7485	6369
6560	4842	5459	6806	6559	9809	10207	10671	7373	10528	7777	7166	5692	7488	7009	7353	7215
65983	4841	3763	3826	2235	7934	4293	7964	6017	9003	6541	7281	2478	5530	3228	7580	2502
3910	4835	3842	8409	1608	6125	835	4029	5247	2023	1383	2950	1543	8706	3091	7950	490
83742	4834	5606	5903	2741	9864	4659	9173	5073	8890	6252	6792	1406	8626	4317	9731	3054
53635	4834	3188	3162	3261	4965	4371	4361	6037	3457	2822	4113	3425	3742	3644	3456	3603
10468	4831	3824	6082	876	8094	2129	19118	10673	9151	5925	5917	989	10835	986	5664	635
55256	4823	4248	4471	4020	5534	5626	7648	5690	7597	5187	5793	4134	6517	4796	6642	4185
1903	4823	5113	8774	9610	837	5579	1556	880	628	1390	1210	7730	1920	7515	1117	15862
84695	4819	5545	5661	3996	8179	4062	13171	8422	6995	4713	8778	1825	11388	3498	7497	3007
10726	4817	2840	3309	3118	3801	3530	4243	4038	3113	2852	3706	2738	3589	3148	3415	3060
10927	4810	5680	5336	5616	4209	6734	5941	4001	5197	4274	4028	4372	5443	6095	6420	5900
1431	4809	5194	6123	5698	5158	7882	7222	3027	7112	5762	6074	5721	6919	7064	6259	6176
1374	4806	2877	4087	1527	5704	1736	5150	4114	4755	2896	3885	1543	5936	2370	4795	1952
10625	4802	4909	7593	6126	7279	11531	11707	6229	8158	8147	3510	5590	5367	5744	7405	4989
7204	4799	11393	10840	8743	8066	15609	13817	5575	14199	11491	6867	6483	10461	11761	9248	10951
6722	4797	4205	4065	4569	3219	4501	4813	3431	4048	3265	4663	4162	4068	3423	4891	3700
6631	4790	2535	2064	2068	2858	2585	3650	3471	3132	2297	3229	1836	3532	2045	3465	2228
677	4789	7080	11889	14071	12284	15337	11019	6478	11850	10537	6990	9143	9146	12925	10956	9387
1892	4787	3284	3807	4538	5314	6102	5372	4428	4257	3741	4777	4545	4741	4450	4191	5022
9685	4783	5454	5500	4745	6044	7141	9315	5367	6509	5398	5209	4340	7549	5356	6762	5347
817	4783	3946	5049	4238	5318	6085	5952	3257	6219	4713	4146	3743	5618	4617	5824	4502
22930	4782	5764	5286	4576	6862	8387	9814	4889	10037	6811	5287	5384	6925	5508	7494	5332
57636	4781	4976	4950	3269	4420	5027	7016	3488	9495	6970	6738	3892	6174	3831	6732	4098
11047	4780	3831	2729	2836	3895	4125	5022	4199	3757	3438	4066	2663	3961	2885	3618	3495
1503	4774	8085	4151	2236	7729	3259	11750	7883	11666	7438	6002	2051	6748	3079	8594	3319
8545	4774	5760	6498	5934	6791	8894	8814	5951	6695	5143	4698	5217	6660	6830	6735	6075
2997	4771	5525	4095	2267	9226	3299	11419	9203	6749	4799	7863	2682	6680	3185	5021	2613
9583	4770	5655	6210	8686	5762	11720	8063	5773	6113	5722	4304	6733	6173	8789	5658	9126
164	4769	6845	6332	6487	6430	10133	8626	4903	7417	6247	5192	5743	5949	6628	6030	7037
116138	4765	4615	3438	3019	5153	3800	4990	5073	4686	3427	4595	2313	4539	3687	5235	3174
253461	4764	5530	6258	3798	6797	5666	9740	4792	8026	5715	5277	2450	7862	5226	9387	3827
1200	4763	4329	7447	9810	8048	14911	7123	5436	10565	13534	10722	12191	5328	12004	9963	10271
5496	4762	3428	4003	3625	4107	4812	5176	3469	4100	3566	3414	2931	4529	3742	4133	3732
132864	4762	4198	5741	5867	5674	7822	6494	5222	6636	4509	5700	6479	5953	7619	5862	5807
7155	4761	7616	8229	7783	6084	8711	10237	3687	6963	5511	5193	6347	7836	7830	7937	8142
27249	4760	5030	4613	3854	5974	5423	8653	4257	6322	5078	5531	3471	6435	4347	6610	3946
51255	4754	3167	1749	2398	3406	3163	4801	6222	2811	2863	3717	2799	3436	2136	3785	2984
5045	4750	5962	5166	5202	5488	7201	7633	3920	7232	5597	5141	4109	5405	5700	5267	5979
80335	4750	6941	6014	5810	5127	7522	7888	3479	7230	5314	4461	4923	6875	6368	7459	6565
10048	4748	4542	3602	2893	7741	5347	7655	6006	6069	4573	4307	2938	4852	4189	6512	3517
29789	4748	4028	3389	3727	3754	4531	6910	4120	4731	4204	5285	3860	4980	3719	5465	4326
27243	4739	2746	2315	2694	3355	3622	3159	4561	2990	2634	3619	3338	2979	3384	3573	3460
3638	4738	7174	4243	4461	5821	5195	3743	2888	5859	7596	8215	3699	2948	4061	8632	3314
22837	4734	5935	4075	1240	12008	2928	20320	11119	15445	7671	7480	1567	7755	2359	12520	1784
523	4732	3918	4784	6299	5886	10041	6574	4562	7639	7221	5303	6342	5068	6952	6139	6202
3679	4731	10498	5970	12841	18026	28674	27361	14568	8015	14904	22981	16457	10297	12084	14220	14860
79834	4731	7549	9730	8041	6754	12034	9796	5575	11612	8846	5650	8135	9548	10203	8953	10478
1595	4726	4549	5123	4733	7869	7316	7344	3808	8704	8509	7145	4037	5045	4378	8293	3922
79171	4722	2395	2269	2376	2711	2685	2927	3657	2508	2244	2842	1907	2845	2013	3012	2930
100462977	4719	1146	2015	2644	7501	3403	2791	14177	2808	3457	4630	3444	1983	2388	2909	1650
7982	4716	2890	2134	882	6353	1719	6299	5294	6947	4531	2898	1113	3324	1171	4204	1370
120	4716	7452	8244	6935	5498	8966	11956	5089	8620	7364	5470	7437	8746	9550	7514	8811
7453	4715	8422	7992	7496	9381	8936	10183	6176	11183	12680	6614	7470	8514	6753	11654	8660
80218	4713	6128	5976	4892	6282	8160	8412	3751	7206	5252	5103	4426	7086	5767	6839	5471
9146	4712	3714	3749	3848	3671	5426	4627	4575	4019	3895	3759	3281	4328	4294	3684	4813
5156	4712	10079	9915	1205	7840	2630	22932	7616	7484	5819	5903	489	13860	4707	10492	1575
1965	4712	4798	4827	3925	4930	5554	8038	3147	5752	4945	4886	3751	6358	4260	6027	4321
1601	4709	5748	7915	6668	11594	13187	13028	7251	11118	10149	8478	8481	11130	7596	8495	6034
51303	4709	1945	1688	1145	2115	1975	3667	3773	2078	1343	2209	874	4425	1599	2354	1394
5202	4707	1833	1261	1254	1632	1257	2291	3951	1721	1710	2311	1042	2245	1227	2367	1327
26524	4706	4513	3435	1656	4275	3438	5839	4452	6302	4008	5230	1814	4028	2315	6009	2210
7106	4706	3214	2960	3109	4994	3831	5358	4974	6511	4851	5047	3285	7027	3722	4915	3641
26278	4703	8845	9026	7328	5693	11674	9637	3742	10351	6461	5558	5482	9536	7744	6405	7222
57659	4699	4773	5340	5094	6824	7695	8026	6039	7527	5925	4745	4230	6282	6158	6552	6074
22978	4699	4835	4813	7156	4954	10735	6043	4444	5608	6231	4386	8653	4576	9204	4699	8337
23350	4695	4289	4262	3632	3404	5679	5104	4252	4149	3951	4250	3793	4376	5537	4534	4462
9180	4691	9908	8045	3564	6372	3558	13679	5720	9997	8118	8376	3854	8283	5148	11291	3417
6051	4690	3441	2847	2253	3933	3094	5335	5516	4135	3188	3425	2553	3967	2962	4095	2849
11230	4689	2287	2139	2249	3679	2887	3704	5434	2433	2073	2690	2358	2731	2541	2819	2308
92579	4687	2788	2538	3458	2444	4108	3531	3797	2876	2843	2976	3427	3237	3399	2839	4048
83871	4687	3251	2786	1534	5011	2452	5290	5146	3913	2698	3864	1766	4325	2029	4259	2069
1958	4685	5598	42103	37881	8103	11299	11098	5855	10341	8964	8294	17982	10409	16395	6441	9001
23392	4684	4901	5340	4545	5218	6688	7757	4617	6586	5446	5383	4441	5343	5442	6276	4790
79002	4681	3329	2826	3050	3126	3276	4050	5728	2770	2827	3960	2725	3866	2838	4274	3656
7329	4674	3934	3501	3033	3958	4334	4970	4448	3956	3145	3842	3391	4544	4038	4433	3568
23568	4674	4647	3859	3720	4903	5287	7460	4197	5258	3950	3623	3962	5839	3984	5179	4297
8910	4672	4245	3467	3207	5117	4908	6512	6151	3717	3179	2992	3252	4886	3362	4635	3730
64374	4667	3633	3091	4270	4941	5388	6546	4508	4898	4713	4839	3386	4980	3915	5111	5504
85456	4666	7396	8920	6838	9466	8987	10122	6001	10042	8585	7826	5345	9128	6519	9348	7668
7874	4665	5067	5212	4761	4900	6657	7614	4318	6185	4511	4598	4541	5895	5573	5304	5125
57720	4663	7188	7572	7277	7783	10495	11409	4337	8852	7286	5279	6774	8323	7966	8241	8765
2537	4659	3151	4566	4932	2168	6150	1377	2387	2053	17851	3532	9795	1162	4478	5700	24489
55860	4658	4199	3765	4454	4658	6077	7504	5239	4800	4494	4072	3982	5408	4808	4969	4790
29766	4655	4422	4863	4247	5782	5454	8005	4375	8365	5974	4875	3453	5899	4746	6502	4224
57190	4654	6338	5562	5133	5406	6603	8088	4118	7139	5869	5995	5256	5794	6826	6604	5911
22906	4651	4665	5035	4861	5012	5314	5776	4042	5934	4424	4254	3605	6045	4554	6106	4480
83939	4650	3691	3447	2798	3342	3911	5267	3534	4381	3767	4688	2913	4305	3529	5350	3126
143888	4649	3438	3862	1490	3145	2704	5103	2765	3934	2935	3029	1515	5224	2453	4852	1680
522	4640	3765	2605	3241	4620	4157	5429	6165	3896	3454	4783	3672	4241	3676	4689	3647
57498	4634	5081	6508	8577	5254	10894	6687	4142	7027	6186	5173	7431	6010	9018	7257	8228
23197	4629	3699	3823	3388	4079	4735	5792	4512	4532	3390	2829	3036	4722	3564	4055	3639
9652	4629	6614	7717	6213	7621	8947	11958	5798	9390	8439	6248	5261	8455	7391	8350	6711
683	4627	5779	2159	1893	5554	5780	6593	6549	7223	6695	4568	2030	5572	3341	8167	2618
57532	4621	6308	5716	5809	5926	8746	8553	4914	8228	6443	4924	5443	6410	7270	5966	6693
6780	4620	5037	4868	3897	6223	6204	7748	4184	6313	4821	4823	4098	5745	5263	5502	4580
52	4609	4650	3377	3641	4888	5214	5771	4614	3873	3596	4351	4124	4871	3834	5082	4013
1316	4607	4577	21045	13941	7260	5241	11202	5317	13505	9476	6313	2543	10527	4864	6738	2711
10186	4602	4302	4812	5820	4756	9728	6635	6027	5147	5460	6111	5632	6263	6243	6948	4765
5585	4601	5462	4082	4249	8838	5548	6543	6315	10026	8753	6446	3923	4488	4497	7206	5880
6829	4600	6045	6901	8285	6838	10049	8390	5404	6627	6579	5354	5798	6982	7576	6334	8261
100133941	4598	394	3024	709	2655	1122	290	52	404	178	199	480	455	376	1828	339
54539	4594	2396	2183	2449	3107	2753	3181	3745	2985	2406	3484	2306	2831	2236	3222	2359
28951	4592	4113	4981	4893	4306	8109	6032	4475	3543	3365	3347	4590	4922	6943	4264	4588
92126	4591	3839	6744	1862	5810	3586	7711	4140	10065	5214	3902	2316	9213	2619	5760	2171
6509	4589	5694	3802	1397	6161	2602	6345	2730	7465	4839	6745	1748	6344	2337	7573	2002
3550	4589	3943	4640	4269	4532	5249	6655	3741	5073	4370	4891	3729	5491	4353	5458	4506
23042	4587	7338	6842	4578	6716	6439	10950	5320	7880	5721	5550	3425	8436	5253	7376	4565
51507	4586	4221	3972	4856	4933	6627	6470	3761	5005	4554	4985	4692	5254	4902	5802	5602
6731	4584	6615	5821	4864	7017	8218	11483	3865	6999	5669	5842	4550	8648	6216	7424	5614
51503	4568	2281	1864	2231	1956	3660	2964	4572	2066	2278	2548	3161	2410	2787	2582	2721
4926	4566	6673	9301	10425	7089	12097	6939	5582	7610	6691	5840	7647	7367	11410	8106	11081
10771	4566	5897	5436	5733	5195	8994	7930	4237	7581	6101	5051	5718	6005	6987	6672	6488
9167	4566	3988	3726	3860	5462	5498	5864	5031	5766	5004	5264	4097	5051	5321	5710	4450
23450	4565	4913	7320	6121	4629	7481	6944	2802	6881	5323	4702	4783	6447	5527	6210	6173
5445	4563	5058	4300	6963	5047	10805	6642	3490	5043	6185	4914	7609	4778	7859	5679	8281
7046	4562	8538	4017	2780	7107	5993	9735	6727	7850	7977	7033	3236	5225	4604	8763	3204
5049	4561	5170	5238	4342	5124	6266	6812	3941	5646	5108	4107	4322	5473	4693	4950	5562
55619	4561	3457	4104	843	3934	1103	6326	3846	3703	2933	3613	504	5634	1577	4930	694
51144	4559	2512	5509	5472	7850	6999	8682	6376	11526	10207	5155	5204	6844	6966	7572	5472
11261	4556	3655	4194	4679	5603	6643	5398	4892	4900	4406	4237	4862	4720	5064	4523	4724
359948	4556	4318	5507	7653	3588	6066	4695	3753	4320	4207	3951	5463	5077	6585	4321	6196
5925	4554	4292	4873	4494	4089	6238	7622	5173	5473	4407	3701	4131	4965	5154	5838	5191
22827	4553	4836	4405	6329	4635	5742	6144	3405	4560	4645	5158	4961	4968	5124	5235	5972
51382	4545	4354	4011	4745	5437	6425	8077	5201	6287	6135	5462	5057	5297	4876	6005	5457
2067	4544	3269	2524	2373	4691	3840	5987	5672	3169	2556	3513	2592	3778	2884	3619	3180
7419	4535	4331	3486	3281	4214	4341	6899	4993	5132	4071	4104	3142	5076	3427	4619	3494
205	4534	9657	5706	4446	13593	9365	21454	11115	14501	10384	11805	5656	11229	7827	11953	6490
6892	4532	3198	4302	4319	4858	5892	5464	3994	5318	5112	3651	4941	4739	4834	4403	5672
9255	4531	2859	2716	2377	4065	3893	4933	3689	3678	2995	3243	2672	3971	2776	3817	2819
26354	4530	4178	3652	3129	3741	4150	6336	3567	4179	3577	3777	2875	4990	3071	4319	2964
64114	4530	5574	6239	6343	9010	8244	10880	5757	11241	9776	6688	5405	8029	6814	7823	6008
26286	4527	4890	4629	3246	5203	5007	8100	4932	6130	4393	3804	2407	7264	4618	5497	3516
10330	4526	3539	2875	4560	3126	4785	5222	4573	3142	3261	4131	4122	4884	3918	4061	5018
11329	4526	4302	5494	5382	5489	7909	6693	4537	6433	5847	6128	4537	5384	5157	6481	5736
27123	4525	1805	1297	185	6148	4261	5608	2465	840	711	2320	145	4350	588	4611	500
23673	4523	6204	4534	5145	6923	9452	9706	5315	7288	6301	7113	5810	5583	6948	7628	5808
6645	4521	4863	4033	1899	4262	2872	6233	4560	4223	3807	4966	2612	5019	2871	6141	2680
51495	4520	5831	5699	7617	6479	9659	8885	3302	7092	7072	5648	7685	5990	7596	6287	7829
55691	4519	6159	4814	1565	3863	2804	6533	3868	6334	4657	5544	1332	6713	3692	5919	1784
58515	4518	1809	1633	2541	2261	2772	3050	4742	2185	1889	2539	2569	2252	2520	2828	2527
6309	4516	4499	5601	6334	4610	7618	6099	3039	6919	6345	4477	4103	3374	4968	6538	6055
58477	4512	2968	3951	4090	4380	5630	6483	3371	4898	4236	3818	3374	5410	3584	4400	3922
2687	4505	1686	2459	295	1856	174	3027	2733	1938	960	1664	164	3417	561	3466	368
5507	4504	5361	4183	3920	6797	8169	13065	7938	7082	5068	5328	4490	8596	5468	9694	5050
64780	4504	3853	4578	2093	5970	2375	5952	7208	3317	2887	6091	1340	5631	2758	4895	1698
23328	4503	6902	5465	3104	4478	3551	8166	3714	6209	4543	5185	3040	6467	3833	6647	3314
2353	4503	2259	34720	43591	2702	6222	1817	2402	5575	5793	3432	7429	6724	10095	3682	5183
54434	4501	8680	8725	5671	8604	12910	11468	5115	14044	9952	8025	5938	9748	8205	9754	7236
7005	4501	4649	3422	1617	4331	2659	5579	4758	4766	3476	4973	1117	4698	2375	6210	2291
23111	4498	4002	5908	5910	5325	7586	6283	4077	6311	5745	5296	6095	5303	7225	6635	6389
9868	4498	4455	4235	3527	4175	4943	6902	3382	5007	3918	3741	3395	5360	3620	4950	4105
2534	4497	4244	3613	5493	4350	8256	4998	4518	4264	4293	3222	4960	3819	6311	4196	6585
57551	4496	7654	7270	8039	5734	12557	10319	4751	9920	7473	4410	6068	7906	9499	7772	9202
79647	4495	5845	4502	4481	6696	6605	9020	3776	6082	5199	5981	3889	6960	5085	6180	4334
780	4494	8048	6633	25455	5107	36955	4982	3856	3540	7808	6668	27581	3214	30634	5608	36198
9320	4493	8540	10248	9631	9798	13617	14737	4567	11532	9506	7027	7005	10539	9593	10005	9809
23705	4492	6135	6153	22282	1997	32755	1052	572	946	5218	2222	16792	1616	21661	2226	25726
27131	4485	3513	3584	4307	3067	5641	3854	2947	3090	2910	4019	4412	3524	4685	3846	4687
64960	4483	1736	1365	1419	2068	1697	2557	4142	2089	1937	2674	1458	2050	1339	2364	1603
9919	4481	5029	5806	4782	5200	6948	6859	5334	6099	4649	4159	3790	5945	5617	5160	5493
6498	4476	5027	4364	3813	4300	6612	6403	6357	5100	4485	5107	3953	4219	5659	5103	3773
50807	4474	7088	8698	4300	8228	7433	11847	4979	10341	6582	7616	3325	10860	5391	10943	4279
9261	4473	5229	4714	3329	5845	5397	7183	4687	7533	5685	4906	3291	5611	4727	6033	4332
3836	4472	4452	4541	4085	4638	5809	7556	4197	6231	4722	4326	3827	5667	4746	5425	4442
8473	4471	4732	6726	4528	8255	9108	6384	12870	6059	5903	4345	3719	6421	7780	5095	5122
57584	4466	6999	8259	14548	4234	16986	4486	3037	7086	7302	4229	12582	4306	14906	5332	14592
5939	4464	4562	4644	4215	6225	7677	7809	5453	8972	7392	4948	4367	5015	5513	5984	4942
63971	4461	5060	6197	7091	6647	9221	9273	4078	9755	7001	4705	6549	6463	6833	7947	7518
4676	4460	4940	4843	7178	3878	7180	6451	3967	4194	4110	4087	6381	5208	6318	5183	8586
51322	4458	6045	5677	5665	6129	8273	8791	5083	7272	6377	5101	4724	7166	7425	6826	6340
55454	4454	4682	4291	3100	5258	5457	8324	4222	7955	5519	4505	3619	5963	5050	5352	3042
5937	4452	3853	4493	3906	4052	4864	5852	3890	4616	3648	3551	3635	5201	5010	4742	3714
55660	4450	5258	5146	4697	4650	6267	7616	3983	5379	4687	4812	4258	5684	4830	5725	4932
5631	4450	3767	3982	4321	6616	6434	8946	5228	6128	4970	5266	4166	5499	3624	7079	4269
9736	4449	7332	7384	6637	6643	10463	9564	5415	9360	6917	5931	6623	7378	8897	7930	7442
3099	4447	6413	5374	3124	9054	5287	14732	10374	7540	5254	10572	3280	8599	5650	10410	3812
51510	4447	4676	4005	4749	5198	6516	7422	4111	5763	5680	5231	4606	5447	5031	5910	5379
2958	4443	2861	2363	2956	3188	3553	4494	4644	3221	2430	3038	3570	3249	3051	3270	3241
221092	4443	3043	2840	2568	3282	3262	4034	3718	3249	2598	3385	2558	3725	2728	3785	2810
823	4440	5195	5281	4918	5085	5725	7662	3549	5617	5050	5142	4551	6184	5041	5183	5963
291	4438	5514	2002	2682	7902	4272	9195	8971	5573	4423	7148	3717	5164	3732	5893	3611
9352	4437	3042	2810	2781	2771	3784	4532	4343	3341	2728	3015	2542	3556	2923	3702	2945
55737	4437	5098	5538	5546	4415	6788	9018	3982	7034	5982	5098	4790	6347	5519	7106	5768
8428	4436	4499	3851	2632	4919	3797	5990	4627	6085	4103	4162	2316	4780	3666	5818	2831
28962	4434	4197	5001	5671	7072	7224	10787	6664	12235	11476	7359	5413	5662	6326	8757	5981
5591	4432	8162	11877	9811	6772	12800	11394	3197	10958	8728	7001	7236	9212	9396	9412	10032
25934	4432	3408	2605	2318	6695	4036	6946	6116	6296	5306	3331	2750	5128	3338	5621	3290
112495	4430	1883	2105	2044	2304	2577	2755	2740	2289	1696	2118	1855	2499	2210	2208	2062
3295	4429	3464	4685	5461	5226	6283	6904	4104	5101	4746	3775	5395	4893	5511	4991	4889
5605	4428	3388	3523	3504	5370	4437	4631	5170	4713	3815	4168	2857	4691	3724	4715	4122
5690	4422	4155	3783	3261	4861	4349	6190	4173	4452	3719	3518	2808	5197	3979	4645	3398
6525	4421	3468	4753	2280	6228	3377	8450	5522	5623	4692	5297	1277	6939	2427	4808	2171
4150	4421	3917	4692	3308	4422	4146	4261	3929	5143	4223	4857	2114	4905	3831	6301	3686
10516	4417	3806	2630	562	3985	2660	2893	3904	2244	1732	3457	956	3630	2419	4140	876
11031	4416	7768	6793	4949	7679	7058	10721	3480	8759	7264	6411	4024	7932	6249	7975	5367
55366	4415	6861	8350	18579	2033	19940	2656	1616	2183	3713	2127	15913	3034	16752	2938	20812
11331	4415	4813	3962	4011	5100	5287	5731	3667	4520	4492	4907	4111	5708	4588	5926	5148
253943	4414	5415	5917	5078	6171	8040	8231	4918	7200	5968	5282	4404	6690	5874	7074	5498
267	4412	4423	4296	5382	6349	7731	6198	4398	5883	5516	4505	5802	4761	6301	4827	5957
84981	4411	4421	3038	2657	3808	4832	4972	6736	3048	2898	4594	3838	4615	4622	3882	3536
5611	4410	4144	5046	4704	4917	7374	8194	3731	4926	3941	3377	4238	5230	4420	4721	4709
5018	4408	2364	2160	2188	2791	2938	3129	3465	2948	2708	3847	2368	3379	3090	3827	2430
329	4405	4870	4786	5373	4441	7145	9317	4494	5310	4056	3391	4130	6671	5814	3972	5492
10197	4405	5495	5181	5399	5006	7407	7597	3285	6012	5015	4158	4432	6320	5435	5695	5908
9522	4399	4034	4067	3513	6111	6019	8130	5638	6499	4922	4316	3587	5636	4589	6013	4178
51258	4397	3171	2913	3489	3249	3980	4604	3658	3767	3242	4113	3108	4422	3058	4371	3588
7336	4397	3308	2481	1884	3940	2884	5527	4126	4010	2919	3772	2133	4101	2615	4062	2303
1613	4397	5173	3611	3550	5144	4223	6004	4609	5238	4669	5825	3108	4882	3224	5242	3958
9644	4396	11630	6956	2011	11149	7874	14335	9353	8520	9720	12205	796	9047	8151	12346	2369
114882	4395	7870	7690	8174	7691	12763	12443	5482	13227	10352	8527	6064	9888	8597	12296	8178
8881	4395	3552	3670	3275	4328	4568	5609	5271	3957	3793	4045	3543	4389	3787	4468	3503
399959	4395	4178	4085	3127	5378	4157	7108	8707	5142	3877	5270	3443	4580	4289	4390	3331
1397	4391	3830	2907	3520	4642	4257	5452	6723	3757	2932	4904	4257	4969	3785	4944	4924
57157	4390	4783	5239	1943	6934	4752	11644	4784	13616	8799	7273	1519	8097	3140	10040	2506
11051	4389	4496	4178	3663	4070	5292	5839	3731	4359	3303	3235	3415	5089	4494	4633	4391
9861	4387	3722	2917	2910	3326	3991	5499	3595	3794	3333	3146	2711	4092	3103	3971	3342
23191	4386	5844	5924	6133	6574	7599	8717	4129	8252	7516	5199	5524	6159	6505	6690	6570
10269	4384	4241	5858	6950	4838	9292	7626	3302	5580	4697	3925	6151	6142	6071	5598	7624
23141	4379	3864	3657	3226	4821	6168	6271	5030	5300	4091	3403	3107	4944	4198	3925	4177
7280	4378	4312	3642	8432	2209	7752	2375	1665	2298	3156	2542	7125	2685	5930	2316	10238
4358	4373	1931	1867	2318	2327	2778	2646	4097	2517	2493	2872	2506	1942	2539	2706	2447
1362	4370	7600	7260	7906	7980	12245	13769	4468	13534	10680	7947	7755	8896	9045	9781	8553
51422	4369	4890	2630	1474	4047	2196	6106	2730	3870	2571	5049	1231	4447	1901	5701	1580
23633	4369	4059	4866	3688	5535	5504	6844	4178	5742	4643	4112	3311	5425	4229	5229	4087
7099	4364	3515	6728	2384	8142	5008	11051	3668	14713	10603	6088	2902	6322	2331	6598	2844
473	4362	4211	4140	3483	4051	5156	4906	4489	4642	3215	4102	3488	3690	5354	4823	4056
5878	4358	6184	5574	5029	6767	7105	9493	4062	8176	7140	7911	5042	7726	5642	8179	6086
253832	4357	4190	4601	2268	5902	4239	9015	4549	6865	4855	4019	2258	5805	3099	5723	2908
27086	4356	4526	3571	1279	4151	1542	3999	4174	3654	2234	4209	794	3277	2238	4927	1054
79718	4355	6054	5710	4803	7616	6591	7431	5247	5860	4286	4696	5134	6193	4848	6947	5255
6782	4354	5951	5817	4705	7138	8567	11108	5158	9173	6555	5432	4207	7883	6499	7939	5549
401397	4354	2225	1946	2284	2715	2809	3389	4545	2694	2338	3342	2193	2786	2297	3136	2367
891	4354	2097	2885	1519	1177	978	3165	1566	2308	1191	1733	600	3111	845	2411	1217
3400	4352	3661	3179	3192	484	2587	2739	1103	959	693	3722	3831	2424	2992	933	3519
9039	4351	3945	3264	3158	4486	4279	6267	4148	4690	4069	3815	3496	4776	3895	4913	3695
56270	4344	5884	3683	3810	6178	6263	7786	5881	5782	4543	5289	3876	5666	5334	6285	5408
79139	4344	4150	4398	3719	5001	5187	7159	3904	5701	4286	4218	3463	5814	3907	5144	3874
5747	4343	6643	4541	4563	4589	7424	6584	3931	6325	4499	3646	4511	5492	5933	6385	5385
4016	4337	4970	3169	3361	3922	6485	5581	5338	2885	3427	4384	3652	4279	3927	5084	4079
5718	4337	2870	2330	1850	2571	2544	4192	3761	2930	2393	2625	1701	3092	2110	2820	2230
7205	4336	4034	4206	6952	4461	8757	4470	3556	5119	4966	4966	6368	5426	6290	4921	8218
84248	4334	5613	4973	4224	6839	6370	9201	5277	7879	5572	5330	4087	6447	4967	6920	4833
3995	4332	3304	2962	2635	6533	4731	5495	7211	4225	4313	5710	3007	4810	3569	4614	3208
10128	4331	4735	5604	5018	3809	6385	7143	2872	7226	6769	5231	4750	6097	5318	6226	5094
25870	4326	6354	6288	10089	6602	12436	9029	2648	9252	8131	6617	8932	8779	10440	7985	12395
23061	4326	6681	6940	6385	8799	8332	10660	5885	10262	8976	9259	7276	7363	7843	7521	7508
715	4324	4781	4543	5323	3837	3320	2534	2799	483	1421	3704	9578	5917	7493	7353	5549
9839	4323	5001	6046	3855	5295	5072	8763	4274	8709	5446	3967	3660	7301	5133	6426	4501
23184	4322	2716	3023	3257	3044	4683	4064	2887	3517	3480	3159	2954	3466	3867	3757	3682
2286	4322	1595	1444	2433	1779	2842	2108	3714	1648	2235	1849	2007	1921	2138	1889	2558
5894	4321	5493	4760	4810	4852	7334	7108	4015	5712	4671	4236	4519	5630	5316	5788	5716
7110	4321	4442	4630	3486	4398	5290	7748	4140	5098	4267	3482	3396	6493	4506	4854	3668
51248	4320	2070	1798	2251	2593	2961	3196	4396	2388	2280	2454	2175	2339	2308	2785	2908
5431	4319	5165	4982	6058	4326	7710	7216	5259	5278	4908	4083	5617	5264	5788	4952	6385
262	4318	4378	4505	3807	3746	4884	5609	2183	4458	3957	3666	3662	3893	4308	3934	3791
28988	4315	5532	4880	5059	7621	6095	8970	5847	5884	5915	6701	4391	6706	4961	6941	5942
4061	4315	3667	3614	3241	6172	3918	6083	5297	5477	8525	5846	3239	5244	3756	6830	6323
1155	4311	2668	2335	2623	3148	2901	3786	4188	2897	2998	4045	2329	3634	2319	3959	3269
55041	4310	7042	7029	7492	9141	11463	13207	3589	14759	10923	6732	6632	9601	8729	9274	8275
9219	4308	3882	3751	3315	3441	4279	4975	3457	3712	3087	3491	2772	4436	3168	4031	3688
6879	4305	5915	5816	6972	7973	9644	10997	5572	7260	6703	5558	6922	7810	6622	7470	7879
27332	4305	3935	5539	5347	4123	6424	5704	4640	4588	4119	3769	4292	4909	5493	4785	4961
23500	4301	6782	8484	1367	8192	3649	10506	3460	10259	7260	8642	1706	9584	3152	13309	2390
22916	4297	4308	3763	4738	4906	6909	5567	3766	4309	3778	4014	5175	4848	5548	5014	5432
441951	4295	3752	2003	3197	2952	4360	4141	5132	2911	2944	4325	4372	3478	4287	5072	4554
8669	4291	3666	3838	3538	3777	4763	6335	3657	4605	3876	4179	3030	4840	3586	4842	3400
7027	4290	4312	4156	2844	4748	3872	7447	4281	5352	4133	4288	2274	5854	3358	5552	3346
9592	4290	3450	6959	11119	2423	3747	3317	3887	3681	3681	4863	5263	3793	4928	3543	4535
23352	4284	9408	8925	8383	8683	12040	11447	8788	11230	8523	6088	6514	9729	11874	7414	9352
252839	4284	3289	2337	3246	3596	3793	4466	4247	2978	2931	3182	3207	3061	3235	3441	4399
10528	4284	3383	3732	3108	2962	3675	5177	2858	3470	3515	4390	2854	4760	2886	3575	3030
4621	4283	3188	2206	126	1328	235	2429	5084	1216	533	4679	78	2975	225	1344	135
394	4280	4308	4584	5572	3857	8644	5567	4042	5920	5288	3341	5520	4000	7740	4893	7087
4651	4275	4355	6908	3957	3979	5046	7378	3167	5433	3230	3486	2878	4825	5084	4027	4299
10628	4273	14211	4287	1990	15898	5131	17754	11437	803	860	878	864	5438	614	520	4223
133	4272	2153	1820	270	5594	357	5639	9788	3196	1816	4669	329	5492	1286	3572	316
9491	4269	3389	3777	3618	4680	5226	4834	3635	4702	3791	3625	3785	4531	4479	4271	4169
10658	4269	3319	4549	4140	2574	4895	4000	2938	4175	3003	2669	3265	3735	4285	3384	3642
16	4269	6503	6211	5973	6438	7987	7872	4144	10087	6534	7029	5333	8187	7779	8672	7476
10016	4269	3458	2737	2970	4043	4095	5547	5684	3509	3261	3824	3440	4599	3021	4041	3868
10554	4265	3894	4674	5235	6334	6637	6460	5129	5558	4472	5084	4349	5684	5870	5600	4906
5531	4263	3285	2541	2665	3224	2966	3802	4660	2948	2834	3239	2310	3244	2238	3245	3241
[truncated: 19,338 more rows]
