# Supplementary material for: Human macular Müller cells rely more on serine biosynthesis to combat oxidative stress than those from the periphery
Source: eLife. 2019 Apr 30;8:e43598. doi: 10.7554/eLife.43598 (PMC6533082; doi:10.7554/eLife.43598)
Supplement: Supplementary file 2. [file elife-43598-supp2.xlsx]

## Sheet: Group1-vs-Group2.GeneDiffExp_th
GeneID	length	M-huPMCs Readnum	P-huPMCs Readnum	p-value	q-value(Storey et al. 2003)	log2Ratio(M-huPMCs Readnum/P-huPMCs Readnum) normalized	Up-Down-Regulation(M-huPMCs Readnum/P-huPMCs Readnum)
255480	3655	0	509	3.84e-89	2.4e-89	-10.2109	Down
400685	2090	0	126	8.84e-30	3.45e-30	-8.19662	Down
285370	2869	0	98	2.6e-24	9.45e-25	-7.83405	Down
100507206	2261	1	143	5.44e-36	2.27e-36	-7.37921	Down
400550	3099	8	1065	5.31e-258	6.16e-258	-7.27598	Down
56956	2515	39	4531	0	0	-7.07955	Down
126006	789	1	114	1.16e-29	4.53e-30	-7.05223	Down
164633	3001	70	7043	0	0	-6.87203	Down
166824	6040	20	1958	0	0	-6.83258	Down
344167	1263	8	776	5.6e-194	5.42e-194	-6.81925	Down
150622	11868	1	93	6.92e-25	2.53e-25	-6.7585	Down
80157	2486	9	713	7.94e-181	7.35e-181	-6.52717	Down
100873969	503	0	39	1.96e-11	5.7e-12	-6.50474	Down
3854	2331	0	38	3.42e-11	9.9e-12	-6.46727	Down
100144595	2362	0	36	1.05e-10	3.01e-11	-6.38926	Down
100288346	713	0	35	1.85e-10	5.27e-11	-6.34862	Down
56934	3386	4	267	1.69e-69	9.36e-70	-6.28003	Down
57152	537	0	33	5.78e-10	1.63e-10	-6.26373	Down
340529	2175	0	33	5.78e-10	1.63e-10	-6.26373	Down
133874	524	0	32	1.03e-09	2.87e-10	-6.21934	Down
79804	766	1	61	3.28e-17	1.07e-17	-6.15008	Down
25818	1570	51	2876	0	0	-6.03676	Down
100652791	1137	0	28	1.05e-08	2.88e-09	-6.02669	Down
100289650	1873	0	26	3.44e-08	9.31e-09	-5.91978	Down
54112	3465	6	311	3.54e-81	2.12e-81	-5.91515	Down
283761	2366	0	25	6.26e-08	1.68e-08	-5.86319	Down
284578	2363	0	25	6.26e-08	1.68e-08	-5.86319	Down
6258	2263	5	249	2.17e-65	1.17e-65	-5.85741	Down
3769	3609	25	1242	0	0	-5.85393	Down
165530	2486	6	295	3.92e-77	2.29e-77	-5.83895	Down
146802	2355	320	15491	0	0	-5.81655	Down
83888	1188	3	145	7.91e-39	3.4e-39	-5.81428	Down
2642	2051	8	370	2.85e-96	1.86e-96	-5.75072	Down
93432	1637	0	23	2.09e-07	5.52e-08	-5.7429	Down
9290	3828	0	23	2.09e-07	5.52e-08	-5.7429	Down
3294	1451	1005	46100	0	0	-5.73884	Down
64150	3454	2	90	9.83e-25	3.59e-25	-5.71119	Down
9464	2368	68	3004	0	0	-5.68454	Down
150538	3397	0	21	7.11e-07	1.85e-07	-5.61166	Down
400258	1847	1	41	4.31e-12	1.27e-12	-5.57689	Down
10215	2521	0	19	2.46e-06	6.28e-07	-5.46727	Down
56344	1845	3	114	8.27e-31	3.27e-31	-5.46727	Down
2290	3216	13	491	9.75e-127	7.32e-127	-5.45848	Down
145270	3668	189	6968	0	0	-5.42362	Down
50489	1872	4	145	1.14e-38	4.89e-39	-5.39925	Down
100128531	973	4	144	2.09e-38	8.95e-39	-5.38926	Down
100130899	4246	0	18	4.61e-06	1.17e-06	-5.38926	Down
203429	2022	0	18	4.61e-06	1.17e-06	-5.38926	Down
6910	3921	17	602	1.31e-154	1.11e-154	-5.36549	Down
342667	3293	1360	46698	0	0	-5.32102	Down
22986	5757	130	4455	0	0	-5.31818	Down
1136	3318	90	3066	0	0	-5.30963	Down
100505782	2176	0	17	8.68e-06	2.18e-06	-5.3068	Down
6332	7290	42	1420	0	0	-5.2987	Down
56301	1962	12	404	3.39e-104	2.3e-104	-5.29259	Down
1280	5087	74	2451	0	0	-5.26904	Down
885	1511	41	1357	0	0	-5.26799	Down
400941	2145	0	16	1.64e-05	4.08e-06	-5.21934	Down
100526761	2650	0	16	1.64e-05	4.08e-06	-5.21934	Down
284801	1224	0	16	1.64e-05	4.08e-06	-5.21934	Down
100126791	1529	0	16	1.64e-05	4.08e-06	-5.21934	Down
29122	1363	0	16	1.64e-05	4.08e-06	-5.21934	Down
2556	2785	83	2612	0	0	-5.19524	Down
3775	2161	133	4118	0	0	-5.17178	Down
283547	4320	71	2163	0	0	-5.14841	Down
1907	1258	207	6163	0	0	-5.11527	Down
388514	2470	11	326	7.12e-84	4.33e-84	-5.10863	Down
84152	1871	26	751	2.55e-190	2.43e-190	-5.07157	Down
7018	2808	14351	412177	0	0	-5.06338	Down
1735	2120	149	4245	0	0	-5.05172	Down
5462	1599	5	142	1.92e-37	8.13e-38	-5.04716	Down
654835	1130	0	14	5.99e-05	1.45e-05	-5.02669	Down
643714	1001	0	14	5.99e-05	1.45e-05	-5.02669	Down
728410	1611	0	14	5.99e-05	1.45e-05	-5.02669	Down
5266	579	2	55	1.88e-15	5.93e-16	-5.0007	Down
29986	1418	12	326	2.31e-83	1.4e-83	-4.9831	Down
869	2435	226	6125	0	0	-4.97965	Down
53405	5988	200	5285	0	0	-4.94317	Down
356	1909	0	13	0.000115366	2.77e-05	-4.91978	Down
391037	1526	0	13	0.000115366	2.77e-05	-4.91978	Down
400746	3991	22	565	2.19e-142	1.76e-142	-4.90201	Down
60676	6940	1268	32285	0	0	-4.88958	Down
2670	3097	41495	1056101	0	0	-4.889	Down
2660	2823	1294	32269	0	0	-4.85958	Down
53826	2229	1134	28000	0	0	-4.84527	Down
5100	4077	45	1084	1.18e-269	1.41e-269	-4.80963	Down
2294	2579	99	2383	0	0	-4.80854	Down
283480	2130	0	12	0.000223664	5.31e-05	-4.8043	Down
83656	1222	0	12	0.000223664	5.31e-05	-4.8043	Down
100505795	1963	0	12	0.000223664	5.31e-05	-4.8043	Down
9283	2459	59	1409	0	0	-4.79715	Down
22895	4605	5	119	3.37e-31	1.34e-31	-4.79223	Down
150356	2533	214	5078	0	0	-4.78792	Down
266629	2330	43	1020	1.81e-253	2.08e-253	-4.78743	Down
1296	4447	2054	48639	0	0	-4.78494	Down
153469	1920	31	726	8.88e-181	8.22e-181	-4.76897	Down
5650	2104	4	93	1.09e-24	3.99e-25	-4.7585	Down
400955	4313	2	46	5.6e-13	1.69e-13	-4.7429	Down
84465	5914	569	13024	0	0	-4.73594	Down
1299	2485	3185	72525	0	0	-4.72845	Down
3765	3029	8	180	4.82e-46	2.24e-46	-4.71119	Down
83698	9510	5	112	2.79e-29	1.08e-29	-4.70476	Down
22844	4933	155	3465	0	0	-4.70185	Down
100505912	898	15	331	5.87e-83	3.55e-83	-4.68313	Down
26291	940	0	11	0.000436624	0.000102043	-4.67877	Down
345274	1502	0	11	0.000436624	0.000102043	-4.67877	Down
407007	110	0	11	0.000436624	0.000102043	-4.67877	Down
196475	2099	0	11	0.000436624	0.000102043	-4.67877	Down
389073	1229	0	11	0.000436624	0.000102043	-4.67877	Down
3229	2435	8	175	1.13e-44	5.17e-45	-4.67055	Down
10610	2105	591	12852	0	0	-4.66203	Down
83715	3531	513	11110	0	0	-4.65609	Down
90249	3749	41	878	5.22e-216	5.45e-216	-4.63986	Down
152816	1926	110	2346	0	0	-4.63397	Down
84871	2988	25	531	2.57e-131	1.97e-131	-4.62805	Down
2779	3617	8	168	9.42e-43	4.23e-43	-4.61166	Down
100309464	2440	2	42	7.25e-12	2.13e-12	-4.61166	Down
51764	1001	7	145	4.48e-37	1.89e-37	-4.59189	Down
606	548	3	62	8.98e-17	2.9e-17	-4.58857	Down
51617	2473	52	1068	6.28e-261	7.35e-261	-4.57959	Down
574414	1234	2	41	1.38e-11	4.03e-12	-4.57689	Down
3691	5925	8957	180896	0	0	-4.55534	Down
348303	1704	2	40	2.62e-11	7.62e-12	-4.54127	Down
284835	2019	4	80	4.2e-21	1.45e-21	-4.54127	Down
283856	2678	4	80	4.2e-21	1.45e-21	-4.54127	Down
100507584	3165	0	10	0.000858642	0.000197832	-4.54127	Down
100124536	132	0	10	0.000858642	0.000197832	-4.54127	Down
100526773	1867	0	10	0.000858642	0.000197832	-4.54127	Down
54959	1301	0	10	0.000858642	0.000197832	-4.54127	Down
5354	3148	540	10795	0	0	-4.5406	Down
4036	15735	143	2844	0	0	-4.53317	Down
9899	11361	742	14752	0	0	-4.53269	Down
4129	2611	1343	26485	0	0	-4.52098	Down
204962	3894	200	3871	0	0	-4.49397	Down
10218	2255	472	9113	0	0	-4.49041	Down
137970	7290	32	617	2.45e-150	2.03e-150	-4.48846	Down
23418	5266	1148	21962	0	0	-4.47715	Down
286183	1566	1	19	4.7e-06	1.19e-06	-4.46727	Down
202134	1794	2	38	9.54e-11	2.74e-11	-4.46727	Down
7079	1667	153	2875	0	0	-4.4513	Down
148641	2891	65	1202	3.98e-289	4.96e-289	-4.42819	Down
27443	5760	219	4046	0	0	-4.42683	Down
157869	3804	1752	32178	0	0	-4.41834	Down
728081	600	3	55	7.97e-15	2.49e-15	-4.41574	Down
284434	7645	64	1165	1.27e-279	1.55e-279	-4.40545	Down
202333	12911	483	8710	0	0	-4.39192	Down
54937	2198	0	9	0.00170193	0.000385934	-4.38926	Down
147199	431	1	18	9.1e-06	2.28e-06	-4.38926	Down
3447	705	0	9	0.00170193	0.000385934	-4.38926	Down
100874173	1236	0	9	0.00170193	0.000385934	-4.38926	Down
644669	2097	1	18	9.1e-06	2.28e-06	-4.38926	Down
6368	641	2	36	3.48e-10	9.86e-11	-4.38926	Down
57687	3784	3608	64796	0	0	-4.38597	Down
29113	1145	100	1793	0	0	-4.38364	Down
2893	5621	156	2785	0	0	-4.3774	Down
219293	3859	161	2840	0	0	-4.3601	Down
57447	2142	744	13120	0	0	-4.35966	Down
776	7726	156	2741	0	0	-4.35442	Down
132112	2265	27	470	3.11e-113	2.2e-113	-4.34097	Down
10345	4782	734	12693	0	0	-4.33145	Down
57282	5717	53	910	7.51e-217	7.87e-217	-4.32114	Down
1298	2831	12251	210104	0	0	-4.31947	Down
245932	515	1	17	1.77e-05	4.38e-06	-4.3068	Down
105	8426	29	493	3.23e-118	2.34e-118	-4.3068	Down
10842	1966	1	17	1.77e-05	4.38e-06	-4.3068	Down
1297	3805	72	1224	1.87e-290	2.33e-290	-4.3068	Down
25984	2163	463	7856	0	0	-4.30405	Down
91522	3080	258	4369	0	0	-4.3012	Down
3166	1896	435	7326	0	0	-4.29328	Down
57408	1309	12	202	1.86e-49	8.89e-50	-4.29259	Down
6947	1577	161	2708	0	0	-4.29143	Down
8395	2654	394	6595	0	0	-4.28444	Down
1117	1516	194	3230	0	0	-4.27674	Down
401498	5399	23	382	1.12e-91	7.12e-92	-4.2732	Down
692225	137	2	33	2.45e-09	6.79e-10	-4.26373	Down
84189	4199	208	3409	0	0	-4.25403	Down
203111	1550	924	15074	0	0	-4.24736	Down
1428	1506	1888	30799	0	0	-4.24729	Down
64850	2155	30	483	8.99e-115	6.4e-115	-4.22833	Down
170690	4974	2557	40946	0	0	-4.22054	Down
3823	1042	0	8	0.00340223	0.000758071	-4.21934	Down
100128124	1016	0	8	0.00340223	0.000758071	-4.21934	Down
149708	1018	0	8	0.00340223	0.000758071	-4.21934	Down
126695	1803	0	8	0.00340223	0.000758071	-4.21934	Down
339906	882	0	8	0.00340223	0.000758071	-4.21934	Down
276	1781	0	8	0.00340223	0.000758071	-4.21934	Down
100124412	1130	0	8	0.00340223	0.000758071	-4.21934	Down
140836	629	0	8	0.00340223	0.000758071	-4.21934	Down
100127888	1440	0	8	0.00340223	0.000758071	-4.21934	Down
100506311	1052	4	64	1.19e-16	3.84e-17	-4.21934	Down
391267	1095	1	16	3.44e-05	8.44e-06	-4.21934	Down
401134	4089	0	8	0.00340223	0.000758071	-4.21934	Down
100131439	644	0	8	0.00340223	0.000758071	-4.21934	Down
100289211	3373	0	8	0.00340223	0.000758071	-4.21934	Down
653404	2725	0	8	0.00340223	0.000758071	-4.21934	Down
619434	1058	0	8	0.00340223	0.000758071	-4.21934	Down
359822	9848	0	8	0.00340223	0.000758071	-4.21934	Down
732275	2618	0	8	0.00340223	0.000758071	-4.21934	Down
348120	3417	0	8	0.00340223	0.000758071	-4.21934	Down
388523	2632	10	160	3.37e-39	1.46e-39	-4.21934	Down
402317	933	0	8	0.00340223	0.000758071	-4.21934	Down
3745	3756	493	7887	0	0	-4.21916	Down
1356	4674	11002	175044	0	0	-4.21122	Down
134	2937	1906	30288	0	0	-4.20946	Down
84677	825	8	126	3.82e-31	1.52e-31	-4.19662	Down
219287	3198	182	2852	0	0	-4.1893	Down
80111	1683	3	47	1.39e-12	4.15e-13	-4.18896	Down
729506	1591	2	31	9.01e-09	2.47e-09	-4.17353	Down
100506388	1034	10	155	8.21e-38	3.49e-38	-4.17353	Down
10083	3246	245	3781	0	0	-4.16725	Down
11197	2240	4577	70390	0	0	-4.16223	Down
8419	1644	3	46	2.65e-12	7.88e-13	-4.15794	Down
84229	2926	7	107	1.48e-26	5.54e-27	-4.15345	Down
85409	1891	11	166	3.58e-40	1.57e-40	-4.13495	Down
167410	3979	1009	15169	0	0	-4.12947	Down
339674	1506	2	30	1.73e-08	4.72e-09	-4.12623	Down
548596	1779	2	30	1.73e-08	4.72e-09	-4.12623	Down
642843	647	1	15	6.73e-05	1.63e-05	-4.12623	Down
54894	4573	114	1706	0	0	-4.12285	Down
2571	3488	320	4784	0	0	-4.12141	Down
93979	2078	35	521	7.84e-122	5.78e-122	-4.11519	Down
374977	4404	7	104	1.01e-25	3.74e-26	-4.11242	Down
954	2156	73	1078	1.72e-249	1.95e-249	-4.10365	Down
401613	4612	10	147	1.36e-35	5.67e-36	-4.09708	Down
26050	4461	157	2289	0	0	-4.08522	Down
167127	2385	1453	21131	0	0	-4.08159	Down
1840	3317	283	4093	0	0	-4.07362	Down
3214	2042	22	318	1.14e-74	6.53e-75	-4.07279	Down
7044	2187	965	13885	0	0	-4.06619	Down
4804	3420	9394	134658	0	0	-4.06075	Down
64106	1311	6	86	2.11e-21	7.36e-22	-4.06064	Down
144100	4820	1321	18922	0	0	-4.0597	Down
2899	9225	434	6209	0	0	-4.05793	Down
554226	1739	7	100	1.31e-24	4.79e-25	-4.05584	Down
10752	8031	1716	24499	0	0	-4.05494	Down
5155	3393	784	11189	0	0	-4.05442	Down
1357	1445	35	499	9.42e-116	6.74e-116	-4.05295	Down
283971	2100	45	641	4.26e-148	3.5e-148	-4.05167	Down
3426	2171	4588	65133	0	0	-4.04679	Down
10991	2572	2179	30825	0	0	-4.0417	Down
196996	3318	49	692	1.98e-159	1.7e-159	-4.03926	Down
6424	2974	2379	33380	0	0	-4.02989	Down
27146	3855	509	7141	0	0	-4.02973	Down
10297	10151	856	11986	0	0	-4.02693	Down
26222	944	0	7	0.00686438	0.00149826	-4.02669	Down
10255	670	0	7	0.00686438	0.00149826	-4.02669	Down
100874237	2078	0	7	0.00686438	0.00149826	-4.02669	Down
8363	356	0	7	0.00686438	0.00149826	-4.02669	Down
157627	2942	10	140	1.2e-33	4.87e-34	-4.02669	Down
64063	1391	1	14	0.000131774	3.16e-05	-4.02669	Down
100874107	1129	0	7	0.00686438	0.00149826	-4.02669	Down
81318	1071	0	7	0.00686438	0.00149826	-4.02669	Down
337878	708	1	14	0.000131774	3.16e-05	-4.02669	Down
131540	1370	1	14	0.000131774	3.16e-05	-4.02669	Down
8842	4257	260	3632	0	0	-4.02352	Down
7547	3939	282	3924	0	0	-4.0179	Down
375057	7713	30	416	2.95e-96	1.92e-96	-4.01289	Down
2554	4412	14	193	1.39e-45	6.39e-46	-4.00444	Down
6932	3322	976	13436	0	0	-4.00242	Down
57057	1824	29	399	3.02e-92	1.92e-92	-4.0016	Down
136306	1804	4	55	3.95e-14	1.21e-14	-4.0007	Down
1381	782	1815	24867	0	0	-3.99553	Down
4324	4456	9843	134835	0	0	-3.99529	Down
134548	3473	102	1386	0	0	-3.98362	Down
11001	2408	66	892	5.85e-203	5.86e-203	-3.97584	Down
343035	4290	10	135	2.93e-32	1.18e-32	-3.97423	Down
642366	6699	8	108	3.85e-26	1.43e-26	-3.97423	Down
4613	2613	27	362	2.15e-83	1.3e-83	-3.9643	Down
117245	3127	34	454	5.25e-104	3.55e-104	-3.95842	Down
55800	6081	315	4190	0	0	-3.95286	Down
5454	4108	255	3387	0	0	-3.95078	Down
100507387	1005	6	79	1.89e-19	6.38e-20	-3.93816	Down
220980	3300	10	131	3.77e-31	1.5e-31	-3.93083	Down
11170	3465	205	2681	0	0	-3.92841	Down
286133	4170	7	91	4.22e-22	1.48e-22	-3.91978	Down
404266	570	1	13	0.000258898	6.12e-05	-3.91978	Down
100534592	838	2	26	2.38e-07	6.27e-08	-3.91978	Down
283483	1967	2	26	2.38e-07	6.27e-08	-3.91978	Down
497190	1954	228	2941	0	0	-3.90854	Down
2346	2737	709	9142	0	0	-3.90799	Down
6833	4980	9	116	1.13e-27	4.29e-28	-3.90739	Down
645323	3562	2319	29788	0	0	-3.90249	Down
30812	3049	1094	14004	0	0	-3.89749	Down
10692	1558	445	5669	0	0	-3.89056	Down
58473	2391	6089	77563	0	0	-3.89043	Down
221002	3235	589	7478	0	0	-3.88565	Down
100129662	849	21	266	5.63e-61	2.95e-61	-3.8823	Down
4062	1006	3	38	4.77e-10	1.35e-10	-3.8823	Down
57480	7237	1477	18622	0	0	-3.8756	Down
2299	2296	10	126	9.22e-30	3.6e-30	-3.87469	Down
7101	3271	1442	18134	0	0	-3.87189	Down
114815	7623	667	8355	0	0	-3.86622	Down
146853	1034	2	25	4.6e-07	1.2e-07	-3.86319	Down
5015	2348	16	200	3.79e-46	1.76e-46	-3.86319	Down
12	1629	4962	61652	0	0	-3.85449	Down
7869	2989	3515	43622	0	0	-3.8528	Down
2628	2602	914	11314	0	0	-3.84911	Down
730005	1261	185	2282	0	0	-3.84404	Down
80725	7050	65	800	2.89e-178	2.65e-178	-3.84083	Down
9074	1389	187	2298	0	0	-3.83861	Down
3757	4307	80	977	7.96e-217	8.33e-217	-3.82962	Down
9806	5463	198	2417	0	0	-3.82898	Down
3761	2075	172	2099	0	0	-3.82856	Down
285220	3677	10	122	1.19e-28	4.56e-29	-3.82815	Down
338917	2995	1051	12817	0	0	-3.82756	Down
27324	3123	425	5177	0	0	-3.82592	Down
641518	1695	7	85	1.97e-20	6.76e-21	-3.82137	Down
7481	1927	77	928	2.28e-205	2.3e-205	-3.81053	Down
23220	5795	1843	22163	0	0	-3.80736	Down
128372	939	0	6	0.013991	0.00297418	-3.8043	Down
677765	134	0	6	0.013991	0.00297418	-3.8043	Down
1990	952	2	24	8.88e-07	2.29e-07	-3.8043	Down
401509	3384	4	48	3.63e-12	1.07e-12	-3.8043	Down
414351	826	0	6	0.013991	0.00297418	-3.8043	Down
653247	1428	0	6	0.013991	0.00297418	-3.8043	Down
100529240	2680	0	6	0.013991	0.00297418	-3.8043	Down
399708	5535	0	6	0.013991	0.00297418	-3.8043	Down
10408	770	0	6	0.013991	0.00297418	-3.8043	Down
246705	583	1	12	0.000510053	0.000118751	-3.8043	Down
653499	506	0	6	0.013991	0.00297418	-3.8043	Down
677820	132	0	6	0.013991	0.00297418	-3.8043	Down
94115	904	0	6	0.013991	0.00297418	-3.8043	Down
26595	942	0	6	0.013991	0.00297418	-3.8043	Down
338579	1331	0	6	0.013991	0.00297418	-3.8043	Down
100507341	797	0	6	0.013991	0.00297418	-3.8043	Down
100885798	1604	0	6	0.013991	0.00297418	-3.8043	Down
345643	2104	0	6	0.013991	0.00297418	-3.8043	Down
1673	336	0	6	0.013991	0.00297418	-3.8043	Down
642345	1675	0	6	0.013991	0.00297418	-3.8043	Down
1444	837	0	6	0.013991	0.00297418	-3.8043	Down
245802	660	1	12	0.000510053	0.000118751	-3.8043	Down
171483	1064	0	6	0.013991	0.00297418	-3.8043	Down
641515	1093	0	6	0.013991	0.00297418	-3.8043	Down
100131390	1455	0	6	0.013991	0.00297418	-3.8043	Down
56914	1477	0	6	0.013991	0.00297418	-3.8043	Down
114786	3925	55	657	1.15e-145	9.38e-146	-3.79773	Down
655	4049	246	2929	0	0	-3.79302	Down
579	2241	35	415	1.47e-92	9.37e-93	-3.78702	Down
92558	3081	220	2602	0	0	-3.78338	Down
2810	1336	104	1227	2.28e-269	2.71e-269	-3.77982	Down
140578	2625	58	684	4.56e-151	3.8e-151	-3.77921	Down
2258	2705	451	5309	0	0	-3.77658	Down
135152	1925	8	94	3.01e-22	1.06e-22	-3.77393	Down
57348	1924	2112	24799	0	0	-3.77294	Down
100507218	2177	36	422	8.24e-94	5.3e-94	-3.77051	Down
1910	4485	2010	23391	0	0	-3.76002	Down
57502	5706	1715	19923	0	0	-3.75749	Down
200150	3305	124	1434	0	0	-3.75097	Down
58	1509	320	3698	0	0	-3.74994	Down
124602	3670	9	104	2.42e-24	8.8e-25	-3.74985	Down
56475	1496	377	4337	0	0	-3.7434	Down
5551	2555	2	23	1.71e-06	4.39e-07	-3.7429	Down
100302145	136	2	23	1.71e-06	4.39e-07	-3.7429	Down
653129	2965	4	46	1.32e-11	3.86e-12	-3.7429	Down
100131187	688	237	2711	0	0	-3.7352	Down
4986	4959	13	148	8.27e-34	3.37e-34	-3.72835	Down
58158	3971	12	136	3.62e-31	1.44e-31	-3.72184	Down
6578	4234	361	4081	0	0	-3.71819	Down
22997	7309	203	2284	0	0	-3.71135	Down
100130934	1151	13	146	2.95e-33	1.2e-33	-3.70872	Down
283174	5306	590	6620	0	0	-3.70738	Down
6622	3215	498	5587	0	0	-3.70719	Down
114805	5674	1581	17652	0	0	-3.70026	Down
8857	16407	628	6984	0	0	-3.69456	Down
8447	2022	223	2470	0	0	-3.68873	Down
10586	2785	394	4347	0	0	-3.68309	Down
2847	2423	123	1355	9.23e-292	1.16e-291	-3.6809	Down
441089	1362	1	11	0.00100749	0.000231353	-3.67877	Down
342865	1243	5	55	1.94e-13	5.89e-14	-3.67877	Down
154860	2653	1	11	0.00100749	0.000231353	-3.67877	Down
2999	987	1	11	0.00100749	0.000231353	-3.67877	Down
392376	957	2	22	3.31e-06	8.41e-07	-3.67877	Down
400084	2092	2	22	3.31e-06	8.41e-07	-3.67877	Down
645974	2200	2	22	3.31e-06	8.41e-07	-3.67877	Down
388813	892	2	22	3.31e-06	8.41e-07	-3.67877	Down
100874366	1408	4	44	4.81e-11	1.39e-11	-3.67877	Down
171019	5089	104	1141	9.75e-246	1.1e-245	-3.67498	Down
57662	4201	100	1088	7.23e-234	7.89e-234	-3.66294	Down
2569	3276	8	87	2.63e-20	9e-21	-3.66228	Down
460	7331	237	2575	0	0	-3.66095	Down
9468	5564	1154	12526	0	0	-3.65955	Down
64072	11134	868	9398	0	0	-3.65592	Down
100188953	1805	16	173	1.09e-38	4.67e-39	-3.65397	Down
219595	1992	30	323	1.33e-70	7.44e-71	-3.64784	Down
256536	2632	79	850	1.39e-182	1.29e-182	-3.64688	Down
26084	5254	1083	11652	0	0	-3.64681	Down
744	5693	375	4033	0	0	-3.64623	Down
158696	2908	8	86	4.98e-20	1.7e-20	-3.6456	Down
644172	2305	20	215	1.4e-47	6.56e-48	-3.6456	Down
85329	1823	29	310	1.07e-67	5.87e-68	-3.63748	Down
27344	1064	1310	13966	0	0	-3.63362	Down
94015	3468	900	9589	0	0	-3.63272	Down
339983	5894	516	5475	0	0	-3.62675	Down
6456	2745	105	1112	4.03e-237	4.44e-237	-3.62403	Down
793	2531	2331	24654	0	0	-3.62214	Down
10819	1159	139	1470	0	0	-3.622	Down
140767	2408	39	412	4.76e-89	2.97e-89	-3.62044	Down
285175	13562	715	7542	0	0	-3.61827	Down
5995	1475	577	6078	0	0	-3.61629	Down
3766	5323	829	8724	0	0	-3.61488	Down
100507240	2091	2	21	6.39e-06	1.61e-06	-3.61166	Down
6507	4188	21561	225974	0	0	-3.609	Down
27254	2545	900	9360	0	0	-3.59785	Down
5947	1487	2471	25687	0	0	-3.59721	Down
91851	4101	30610	317194	0	0	-3.59263	Down
338094	1998	3	31	4.5e-08	1.21e-08	-3.58857	Down
5028	3110	158	1625	0	0	-3.58178	Down
3782	13080	93	954	8.42e-202	8.39e-202	-3.57802	Down
131034	2587	167	1713	0	0	-3.57794	Down
53904	5798	822	8423	0	0	-3.57646	Down
3800	6958	1034	10590	0	0	-3.57573	Down
116159	3094	64	655	4.26e-139	3.38e-139	-3.57469	Down
2823	3697	11338	115773	0	0	-3.5714	Down
100131096	3189	162	1650	0	0	-3.56774	Down
64067	5939	265	2699	0	0	-3.5677	Down
349136	2056	28	285	1.69e-61	8.87e-62	-3.5668	Down
728606	2598	6	61	1.95e-14	6.04e-15	-3.56511	Down
168002	2942	221	2245	0	0	-3.56394	Down
23007	6473	740	7505	0	0	-3.56159	Down
202151	2635	225	2276	0	0	-3.55784	Down
780776	3339	96	971	1.77e-204	1.78e-204	-3.5577	Down
55118	2912	301	3033	0	0	-3.55225	Down
6402	2442	190	1912	0	0	-3.55035	Down
54768	3718	60	602	3.13e-127	2.36e-127	-3.54607	Down
89792	3335	529	5307	0	0	-3.54589	Down
57537	6061	2303	23064	0	0	-3.54339	Down
245936	397	0	5	0.0288411	0.00598274	-3.54127	Down
11272	353	0	5	0.0288411	0.00598274	-3.54127	Down
5301	996	0	5	0.0288411	0.00598274	-3.54127	Down
60675	1613	1	10	0.00199499	0.000451212	-3.54127	Down
100874242	798	1	10	0.00199499	0.000451212	-3.54127	Down
3670	2729	18	180	2.74e-39	1.19e-39	-3.54127	Down
388428	1577	0	5	0.0288411	0.00598274	-3.54127	Down
497049	1463	0	5	0.0288411	0.00598274	-3.54127	Down
9834	9613	0	5	0.0288411	0.00598274	-3.54127	Down
780853	217	0	5	0.0288411	0.00598274	-3.54127	Down
100874171	874	0	5	0.0288411	0.00598274	-3.54127	Down
283116	1359	0	5	0.0288411	0.00598274	-3.54127	Down
8538	1767	1	10	0.00199499	0.000451212	-3.54127	Down
415056	900	0	5	0.0288411	0.00598274	-3.54127	Down
389123	622	0	5	0.0288411	0.00598274	-3.54127	Down
286184	3727	0	5	0.0288411	0.00598274	-3.54127	Down
390667	1422	0	5	0.0288411	0.00598274	-3.54127	Down
3215	1830	16	160	4.1e-35	1.69e-35	-3.54127	Down
51314	2327	2	20	1.24e-05	3.08e-06	-3.54127	Down
8386	939	0	5	0.0288411	0.00598274	-3.54127	Down
100289410	1173	5	50	4.79e-12	1.42e-12	-3.54127	Down
3950	1077	0	5	0.0288411	0.00598274	-3.54127	Down
165257	2049	12	120	9.39e-27	3.52e-27	-3.54127	Down
645591	1334	0	5	0.0288411	0.00598274	-3.54127	Down
439950	2277	0	5	0.0288411	0.00598274	-3.54127	Down
677836	236	1	10	0.00199499	0.000451212	-3.54127	Down
389812	762	0	5	0.0288411	0.00598274	-3.54127	Down
390058	939	0	5	0.0288411	0.00598274	-3.54127	Down
219670	3399	205	2049	0	0	-3.54056	Down
56896	5225	151	1498	0	0	-3.52976	Down
150209	2439	192	1896	0	0	-3.52312	Down
79784	6930	1214	11969	0	0	-3.5208	Down
10675	2334	577	5684	0	0	-3.5196	Down
128434	2018	974	9591	0	0	-3.51903	Down
57530	5132	1151	11332	0	0	-3.51878	Down
1005	2828	16	157	2.73e-34	1.12e-34	-3.51396	Down
65268	6834	709	6936	0	0	-3.50958	Down
64409	3518	1164	11381	0	0	-3.5088	Down
79689	4587	80	782	2.51e-163	2.2e-163	-3.50843	Down
30813	2344	13	127	5.07e-28	1.93e-28	-3.50758	Down
26220	3334	73	710	3.08e-148	2.53e-148	-3.50119	Down
201501	4188	142	1380	4.4e-286	5.44e-286	-3.50004	Down
2890	5804	2930	28460	0	0	-3.4993	Down
23242	5326	1122	10869	0	0	-3.49541	Down
84451	5809	489	4737	0	0	-3.49541	Down
728276	2511	9	87	1.22e-19	4.11e-20	-3.49236	Down
100129617	1926	3	29	1.65e-07	4.36e-08	-3.49236	Down
11341	907	23335	225492	0	0	-3.49185	Down
482	3350	1806	17439	0	0	-3.49079	Down
83896	614	13	125	1.8e-27	6.8e-28	-3.48468	Down
2901	3551	1394	13393	0	0	-3.48351	Down
3983	7704	28103	269599	0	0	-3.48136	Down
345193	3583	108	1027	6.02e-212	6.2e-212	-3.46867	Down
54836	2354	6	57	2.5e-13	7.59e-14	-3.46727	Down
129868	1642	2	19	2.38e-05	5.88e-06	-3.46727	Down
54072	1480	2	19	2.38e-05	5.88e-06	-3.46727	Down
5053	2680	15	142	7.85e-31	3.1e-31	-3.46219	Down
43	2978	609	5764	0	0	-3.46189	Down
23336	7355	32768	309298	0	0	-3.45798	Down
8708	2168	164	1546	0	0	-3.45611	Down
84063	2993	60	564	7.25e-117	5.21e-117	-3.452	Down
57565	4261	230	2160	0	0	-3.45066	Down
125704	2048	607	5699	0	0	-3.45028	Down
27233	1664	263	2466	0	0	-3.44838	Down
285484	1485	12	112	1.48e-24	5.38e-25	-3.44173	Down
761	1753	80	743	1.04e-152	8.75e-153	-3.43463	Down
158326	10086	90	835	2.65e-171	2.39e-171	-3.43312	Down
4826	1338	193	1789	0	0	-3.43182	Down
154822	4082	8	74	1.03e-16	3.31e-17	-3.42879	Down
100131176	799	4	37	4.36e-09	1.2e-09	-3.42879	Down
594855	2012	28	259	2.15e-54	1.07e-54	-3.42879	Down
26298	5467	127	1171	6.81e-239	7.55e-239	-3.42418	Down
3791	6055	6775	62418	0	0	-3.42301	Down
8911	10007	44	404	1.32e-83	8.02e-84	-3.41812	Down
256435	3259	153	1399	3.54e-284	4.36e-284	-3.41213	Down
4435	1251	87	792	1.52e-161	1.32e-161	-3.40575	Down
84630	7128	135	1228	2.93e-249	3.34e-249	-3.40462	Down
57863	3698	4382	39781	0	0	-3.40176	Down
387590	1483	176	1593	0	0	-3.39744	Down
7306	2876	42	380	2.33e-78	1.37e-78	-3.39688	Down
26038	9663	114	1031	3.41e-209	3.48e-209	-3.39628	Down
5676	2046	2	18	4.6e-05	1.12e-05	-3.38926	Down
155006	3398	1	9	0.00395916	0.000878668	-3.38926	Down
100158262	348	1	9	0.00395916	0.000878668	-3.38926	Down
4308	6022	42	378	8.12e-78	4.76e-78	-3.38926	Down
284800	5111	6	54	1.69e-12	5.04e-13	-3.38926	Down
339	911	1	9	0.00395916	0.000878668	-3.38926	Down
159963	6253	71	635	3.96e-129	3.01e-129	-3.3802	Down
7434	3961	424	3792	0	0	-3.38016	Down
1602	5246	1578	14089	0	0	-3.37774	Down
127733	2987	69	615	5.64e-125	4.21e-125	-3.37526	Down
100862662	2325	18	160	8.04e-34	3.28e-34	-3.37134	Down
23349	5950	227	2017	0	0	-3.37078	Down
387597	8127	3476	30804	0	0	-3.36696	Down
11061	1538	215	1899	0	0	-3.36217	Down
29118	1850	31	273	2.73e-56	1.38e-56	-3.3579	Down
6285	1135	336	2958	0	0	-3.35743	Down
57464	5115	2722	23957	0	0	-3.35705	Down
4684	6070	9082	79716	0	0	-3.35313	Down
285180	3638	4	35	1.57e-08	4.28e-09	-3.34862	Down
54413	3995	170	1486	5.57e-297	7.03e-297	-3.34717	Down
10630	2828	3486	30352	0	0	-3.34149	Down
339416	2671	208	1809	0	0	-3.33988	Down
375704	1093	265	2297	0	0	-3.33502	Down
286676	2908	3	26	1.15e-06	2.96e-07	-3.33482	Down
340543	1166	154	1332	2.06e-265	2.42e-265	-3.33193	Down
3737	2267	143	1235	4.16e-246	4.7e-246	-3.32976	Down
642273	3963	209	1799	0	0	-3.32496	Down
122481	3318	33	284	5.16e-58	2.64e-58	-3.32469	Down
547	9233	4267	36511	0	0	-3.31638	Down
90134	4242	31	265	4.01e-54	2e-54	-3.31499	Down
55964	4656	220	1876	0	0	-3.31142	Down
2824	3219	14823	126164	0	0	-3.30873	Down
7012	451	2	17	8.88e-05	2.14e-05	-3.3068	Down
685	1323	191	1623	0	0	-3.30636	Down
285489	2583	709	6024	0	0	-3.3062	Down
64856	4659	13964	118042	0	0	-3.29885	Down
2781	3225	581	4903	0	0	-3.29639	Down
5655	3123	23	194	6.63e-40	2.89e-40	-3.29569	Down
79148	2480	305	2563	0	0	-3.29029	Down
221074	2808	89	747	4.04e-148	3.33e-148	-3.28857	Down
2048	4869	3110	26101	0	0	-3.28846	Down
401562	1851	36	302	5.22e-61	2.73e-61	-3.28782	Down
80975	2233	34	285	1.16e-57	5.94e-58	-3.28669	Down
2982	9454	1418	11885	0	0	-3.28655	Down
9547	1989	142	1190	1.35e-234	1.47e-234	-3.28634	Down
22979	7500	1748	14596	0	0	-3.28113	Down
54463	3308	1607	13399	0	0	-3.27902	Down
57628	5306	30	250	1.08e-50	5.23e-51	-3.27823	Down
2215	2394	3	25	2.19e-06	5.59e-07	-3.27823	Down
1271	2070	229	1907	0	0	-3.27722	Down
1191	3012	99764	830449	0	0	-3.27664	Down
222553	4852	1199	9940	0	0	-3.27075	Down
136288	2149	18	149	7.78e-31	3.07e-31	-3.26858	Down
361	5216	2941	24340	0	0	-3.26829	Down
7021	5770	26	215	1.02e-43	4.61e-44	-3.26709	Down
113091	459	4	33	5.64e-08	1.51e-08	-3.26373	Down
140597	1123	888	7298	0	0	-3.25821	Down
80258	3269	88	723	2.81e-142	2.26e-142	-3.25776	Down
26059	6138	174	1427	1.33e-278	1.63e-278	-3.25516	Down
26027	3181	243	1985	0	0	-3.24945	Down
245	2768	25	204	2.28e-41	1.01e-41	-3.24791	Down
1644	2090	7	57	1.09e-12	3.27e-13	-3.24487	Down
238	6267	103	837	1.06e-163	9.25e-164	-3.24192	Down
442319	1679	18	146	5.04e-30	1.97e-30	-3.23924	Down
145447	1708	321	2595	0	0	-3.23443	Down
1943	2143	64	516	2.24e-101	1.5e-101	-3.23057	Down
778	6080	17	137	3.29e-28	1.26e-28	-3.22991	Down
6405	3531	2460	19819	0	0	-3.22949	Down
575	5535	72	580	1.14e-113	8.08e-114	-3.22932	Down
5522	4315	141	1135	1.95e-220	2.07e-220	-3.22826	Down
9001	3944	114	916	3.53e-178	3.24e-178	-3.22565	Down
143425	3958	148	1189	1.21e-230	1.31e-230	-3.22542	Down
4647	7465	447	3586	0	0	-3.22337	Down
50937	8116	4030	32257	0	0	-3.2201	Down
677830	136	1	8	0.00787182	0.00170889	-3.21934	Down
653687	2096	2	16	0.000171072	4.08e-05	-3.21934	Down
613211	201	1	8	0.00787182	0.00170889	-3.21934	Down
339593	2291	1	8	0.00787182	0.00170889	-3.21934	Down
100132963	1028	1	8	0.00787182	0.00170889	-3.21934	Down
285548	1749	4	32	1.07e-07	2.84e-08	-3.21934	Down
279	1660	2	16	0.000171072	4.08e-05	-3.21934	Down
53336	1630	1	8	0.00787182	0.00170889	-3.21934	Down
497634	2149	1	8	0.00787182	0.00170889	-3.21934	Down
133121	3936	2	16	0.000171072	4.08e-05	-3.21934	Down
403273	933	1	8	0.00787182	0.00170889	-3.21934	Down
79983	3949	1	8	0.00787182	0.00170889	-3.21934	Down
5009	1647	1	8	0.00787182	0.00170889	-3.21934	Down
3785	3251	1	8	0.00787182	0.00170889	-3.21934	Down
400500	1314	1	8	0.00787182	0.00170889	-3.21934	Down
9607	933	1	8	0.00787182	0.00170889	-3.21934	Down
85293	754	2	16	0.000171072	4.08e-05	-3.21934	Down
9452	1851	1567	12533	0	0	-3.21899	Down
1474	618	419	3350	0	0	-3.21848	Down
65997	1979	159	1268	4.06e-245	4.57e-245	-3.21479	Down
200162	7125	59	470	4.43e-92	2.81e-92	-3.21321	Down
51127	2085	54	430	2.15e-84	1.31e-84	-3.21264	Down
57468	6084	120	955	5.58e-185	5.24e-185	-3.2118	Down
55799	3689	966	7669	0	0	-3.20828	Down
57689	3127	512	4061	0	0	-3.20696	Down
84239	4281	24	190	3.29e-38	1.41e-38	-3.20423	Down
23504	6335	166	1313	6.43e-253	7.36e-253	-3.20295	Down
6565	5523	632	4986	0	0	-3.19922	Down
2916	6143	88	693	3.13e-134	2.44e-134	-3.19662	Down
645434	1690	18	141	1.12e-28	4.32e-29	-3.18896	Down
100885775	688	17	133	3.95e-27	1.49e-27	-3.18716	Down
4184	784	5	39	5.29e-09	1.46e-09	-3.18281	Down
9671	4650	15	117	4.91e-24	1.78e-24	-3.18281	Down
64344	5899	48	374	5.06e-73	2.87e-73	-3.18127	Down
9628	6073	131	1020	1.02e-195	9.97e-196	-3.18027	Down
2532	2024	173	1340	6.52e-256	7.52e-256	-3.17273	Down
91133	3604	80	619	2.88e-119	2.09e-119	-3.17121	Down
10418	5154	18477	142888	0	0	-3.17042	Down
114041	1469	26	201	5.96e-40	2.6e-40	-3.16995	Down
136259	1509	11	85	7.83e-18	2.57e-18	-3.1693	Down
164832	13920	481	3713	0	0	-3.16781	Down
5799	4842	343	2644	0	0	-3.16578	Down
9745	4935	1063	8184	0	0	-3.164	Down
63973	2370	23	177	2.53e-35	1.05e-35	-3.16338	Down
9699	6797	144	1108	2.12e-211	2.17e-211	-3.16316	Down
80164	4518	227	1746	0	0	-3.16263	Down
114804	4915	867	6667	0	0	-3.16227	Down
644414	213	6	46	2.65e-10	7.53e-11	-3.15794	Down
1482	1961	27	207	5.87e-41	2.59e-41	-3.15794	Down
760	1666	10870	83269	0	0	-3.15677	Down
721	5444	178	1363	4.73e-259	5.51e-259	-3.15617	Down
400954	7853	374	2862	0	0	-3.15525	Down
6121	2608	48	367	3.77e-71	2.11e-71	-3.15401	Down
157506	3981	11480	87752	0	0	-3.15365	Down
441869	2205	290	2211	0	0	-3.14991	Down
5349	1588	71	541	7.74e-104	5.23e-104	-3.14908	Down
219736	3396	106	807	7.3e-154	6.15e-154	-3.14784	Down
30062	3197	1458	11093	0	0	-3.14693	Down
8633	9879	3386	25736	0	0	-3.14547	Down
117	6593	5	38	9.94e-09	2.72e-09	-3.14534	Down
1558	2024	10	76	5.23e-16	1.67e-16	-3.14534	Down
343990	3884	70	531	9.09e-102	6.1e-102	-3.14262	Down
79608	5879	387	2925	0	0	-3.13737	Down
144448	1035	18	136	2.48e-27	9.35e-28	-3.13688	Down
51176	3620	437	3298	0	0	-3.13522	Down
157638	5503	10750	81124	0	0	-3.13513	Down
56937	4934	34314	258631	0	0	-3.13336	Down
100132987	2830	83	625	4.48e-119	3.26e-119	-3.13201	Down
6422	4482	18415	138552	0	0	-3.13081	Down
753	9148	1230	9233	0	0	-3.12748	Down
83937	2509	14216	106680	0	0	-3.12704	Down
246119	1628	2	15	0.000329172	7.75e-05	-3.12623	Down
56302	2486	2	15	0.000329172	7.75e-05	-3.12623	Down
152015	1018	2	15	0.000329172	7.75e-05	-3.12623	Down
5063	2754	251	1879	0	0	-3.12354	Down
100131825	3294	42	314	1.38e-60	7.21e-61	-3.12164	Down
10529	9231	2993	22366	0	0	-3.12098	Down
100507173	2785	11	82	5.04e-17	1.63e-17	-3.11746	Down
9256	7698	216	1610	3.44e-302	4.38e-302	-3.1173	Down
2104	5714	71	529	1.22e-100	8.11e-101	-3.11671	Down
6457	1792	63	468	3.8e-89	2.38e-89	-3.11242	Down
9901	8977	693	5130	0	0	-3.10737	Down
114088	4946	2855	21132	0	0	-3.1072	Down
65999	1979	122	902	1.2e-169	1.08e-169	-3.10558	Down
390792	1696	8	59	1.28e-12	3.81e-13	-3.10198	Down
23541	4303	7927	58363	0	0	-3.09955	Down
4239	1978	10100	74176	0	0	-3.09594	Down
161502	1596	3	22	1.5e-05	3.74e-06	-3.09381	Down
9201	8463	5622	41210	0	0	-3.09318	Down
25769	10857	161	1176	2.08e-219	2.19e-219	-3.08809	Down
116135	1718	10	73	3.36e-15	1.06e-15	-3.08723	Down
128344	2346	314	2284	0	0	-3.08206	Down
6854	3887	166	1205	3.65e-224	3.9e-224	-3.07912	Down
222008	1286	4	29	7.16e-07	1.86e-07	-3.07732	Down
200772	2274	4	29	7.16e-07	1.86e-07	-3.07732	Down
9402	1552	4	29	7.16e-07	1.86e-07	-3.07732	Down
100506433	2903	17	123	1.9e-24	6.89e-25	-3.07439	Down
3592	1450	438	3164	0	0	-3.07208	Down
70	3693	737	5323	0	0	-3.07184	Down
152789	3011	496	3580	0	0	-3.07089	Down
347733	2019	13474	97194	0	0	-3.07003	Down
1365	1318	66	476	1.65e-89	1.04e-89	-3.06976	Down
57611	4833	139	1001	6.34e-186	5.98e-186	-3.06762	Down
121256	5777	1151	8277	0	0	-3.06556	Down
7274	2633	32	230	3.96e-44	1.8e-44	-3.06483	Down
646960	2158	19	136	9.68e-27	3.63e-27	-3.05887	Down
6662	3963	7159	51233	0	0	-3.05858	Down
3973	3093	525	3751	0	0	-3.05622	Down
9514	1791	168	1199	2.06e-221	2.19e-221	-3.05464	Down
10900	2047	231	1641	1.26e-301	1.61e-301	-3.04795	Down
2878	1779	77249	548737	0	0	-3.04786	Down
285533	1589	29	206	1.65e-39	7.18e-40	-3.04786	Down
8522	8211	1700	12075	0	0	-3.04775	Down
653857	1298	31	220	4.66e-42	2.08e-42	-3.0465	Down
7143	5190	22	156	2.62e-30	1.03e-30	-3.04531	Down
114784	13108	1351	9573	0	0	-3.04428	Down
253559	9580	188	1332	6.03e-245	6.78e-245	-3.04413	Down
91653	4293	1238	8766	0	0	-3.04325	Down
79781	3343	334	2364	0	0	-3.04265	Down
7482	2515	2596	18367	0	0	-3.04209	Down
1463	6406	48	339	1.05e-63	5.59e-64	-3.03952	Down
2555	2784	18	127	6.27e-25	2.29e-25	-3.0381	Down
3321	7253	1586	11159	0	0	-3.03408	Down
1804	4571	545	3829	0	0	-3.03198	Down
491	8962	166	1164	2.48e-213	2.57e-213	-3.02917	Down
51704	2870	1236	8666	0	0	-3.02903	Down
1517	1105	5	35	6.54e-08	1.75e-08	-3.02669	Down
3219	2711	3	21	2.85e-05	7e-06	-3.02669	Down
187	3905	2	14	0.000632236	0.000146506	-3.02669	Down
164237	1372	1	7	0.0156721	0.00332021	-3.02669	Down
677841	204	6	42	3.24e-09	8.97e-10	-3.02669	Down
100874158	906	4	28	1.35e-06	3.46e-07	-3.02669	Down
23617	1832	1	7	0.0156721	0.00332021	-3.02669	Down
140902	762	3	21	2.85e-05	7e-06	-3.02669	Down
254956	724	11	77	1.11e-15	3.51e-16	-3.02669	Down
100750325	429	1	7	0.0156721	0.00332021	-3.02669	Down
286204	5641	26	182	6.93e-35	2.86e-35	-3.02669	Down
189	1611	1	7	0.0156721	0.00332021	-3.02669	Down
100131117	1719	1	7	0.0156721	0.00332021	-3.02669	Down
344018	722	1	7	0.0156721	0.00332021	-3.02669	Down
729830	4576	240	1671	2.41e-304	3.07e-304	-3.01894	Down
126823	1348	133	926	1.35e-169	1.21e-169	-3.01892	Down
57595	3745	1193	8284	0	0	-3.01507	Down
3786	11266	432	2999	0	0	-3.01472	Down
6096	3604	726	5039	0	0	-3.01443	Down
443	1435	46	318	2.6e-59	1.34e-59	-3.00866	Down
348174	2321	241	1666	1.86e-302	2.37e-302	-3.00862	Down
9068	3555	662	4575	0	0	-3.00821	Down
113763	2896	121	836	8.86e-153	7.43e-153	-3.00783	Down
1950	5600	1947	13429	0	0	-3.00537	Down
1496	4005	3863	26572	0	0	-3.00145	Down
27156	1286	15	103	2.74e-20	9.37e-21	-2.99895	Down
55930	6975	1035	7080	0	0	-2.99346	Down
57007	2114	2969	20293	0	0	-2.99227	Down
4081	2907	7036	48064	0	0	-2.99147	Down
338707	3463	1409	9624	0	0	-2.9913	Down
4858	1885	60	409	2.81e-75	1.62e-75	-2.9884	Down
3798	3897	457	3114	0	0	-2.98784	Down
2562	5783	308	2097	0	0	-2.98666	Down
9892	4529	383	2606	0	0	-2.98576	Down
23624	1591	50	340	8.03e-63	4.26e-63	-2.98487	Down
58480	4386	546	3712	0	0	-2.98456	Down
144453	3552	227	1543	3.99e-278	4.85e-278	-2.98431	Down
22989	7074	165	1121	1.36e-202	1.36e-202	-2.98359	Down
3746	6807	23	156	9.87e-30	3.85e-30	-2.98118	Down
54886	2461	32	217	1.09e-40	4.78e-41	-2.98089	Down
5122	5166	76	515	4.85e-94	3.12e-94	-2.97984	Down
4137	6816	766	5184	0	0	-2.97799	Down
5653	1527	21	142	3.55e-27	1.34e-27	-2.97677	Down
7476	1732	37	250	1.55e-46	7.24e-47	-2.97567	Down
100293534	5427	176	1187	1.14e-213	1.18e-213	-2.97301	Down
940	4900	54	364	7.37e-67	4.02e-67	-2.97225	Down
152404	3577	369	2487	0	0	-2.97205	Down
2567	2031	823	5531	0	0	-2.96791	Down
4440	2989	856	5751	0	0	-2.96747	Down
147658	2086	10	67	1.36e-13	4.14e-14	-2.9635	Down
89876	4449	168	1125	6.04e-202	6.03e-202	-2.96273	Down
132204	2632	348	2326	0	0	-2.96003	Down
8714	5183	6706	44797	0	0	-2.95922	Down
4488	2224	162	1082	4.55e-194	4.41e-194	-2.95897	Down
720	5426	470	3138	0	0	-2.95845	Down
3445	1039	3	20	5.38e-05	1.31e-05	-2.9563	Down
114783	4972	271	1802	0	0	-2.95257	Down
3131	5607	1278	8496	0	0	-2.95223	Down
6017	1752	3316	22005	0	0	-2.94965	Down
863	4372	19	126	4.33e-24	1.57e-24	-2.94869	Down
80864	1335	45	298	1.28e-54	6.39e-55	-2.94665	Down
9427	2872	116	768	8.99e-138	7.1e-138	-2.94632	Down
140733	4863	226	1495	4.02e-266	4.75e-266	-2.94509	Down
9355	2416	2741	18108	0	0	-2.94319	Down
4242	2129	82	539	6e-97	3.94e-97	-2.93593	Down
85397	912	7	46	1.04e-09	2.9e-10	-2.93555	Down
100533183	2413	7	46	1.04e-09	2.9e-10	-2.93555	Down
51716	2259	42	276	1.54e-50	7.41e-51	-2.93555	Down
147111	2281	30	197	1.46e-36	6.14e-37	-2.9345	Down
2861	3815	2137	14017	0	0	-2.93286	Down
3439	863	9	59	4.9e-12	1.45e-12	-2.93206	Down
122618	1964	18	118	1.51e-22	5.35e-23	-2.93206	Down
10446	3227	897	5863	0	0	-2.9278	Down
84879	2236	2959	19337	0	0	-2.92752	Down
53353	16557	414	2704	0	0	-2.92673	Down
341152	963	2	13	0.00121148	0.000277078	-2.91978	Down
90523	1825	2	13	0.00121148	0.000277078	-2.91978	Down
79740	3371	32	208	2.52e-38	1.08e-38	-2.91978	Down
54511	2571	24	156	3.63e-29	1.4e-29	-2.91978	Down
3934	840	2	13	0.00121148	0.000277078	-2.91978	Down
389549	2105	2	13	0.00121148	0.000277078	-2.91978	Down
403340	3126	251	1629	3.89e-287	4.82e-287	-2.91757	Down
5080	6969	5121	33216	0	0	-2.91672	Down
158038	3236	36	233	1.23e-42	5.51e-43	-2.9136	Down
57216	5355	1169	7559	0	0	-2.91226	Down
84457	3581	2689	17383	0	0	-2.91187	Down
6414	2252	3915	25301	0	0	-2.91145	Down
81551	1352	52	336	1.2e-60	6.25e-61	-2.91122	Down
79957	2277	332	2144	0	0	-2.91039	Down
766	1715	9	58	9.03e-12	2.65e-12	-2.90739	Down
57156	5434	385	2479	0	0	-2.90617	Down
3767	3418	44	283	2.96e-51	1.44e-51	-2.90456	Down
100130717	650	7	45	1.92e-09	5.34e-10	-2.90384	Down
90288	2169	47	302	1.5e-54	7.51e-55	-2.90315	Down
257000	3693	127	816	3.61e-144	2.92e-144	-2.90308	Down
85407	8716	183	1175	1.27e-206	1.28e-206	-2.90208	Down
23550	5039	716	4589	0	0	-2.89949	Down
7102	1816	1687	10806	0	0	-2.89864	Down
55259	2651	84	538	1.42e-95	9.2e-96	-2.89848	Down
79836	2625	115	736	5.55e-130	4.24e-130	-2.89741	Down
2565	6769	10	64	8.49e-13	2.54e-13	-2.89741	Down
56245	4132	192	1226	6.44e-215	6.69e-215	-2.89412	Down
57369	1096	8	51	1.78e-10	5.08e-11	-2.89176	Down
6616	2069	167	1061	8.21e-186	7.75e-186	-2.88684	Down
389337	4865	3811	24201	0	0	-2.88616	Down
794	1485	32	203	5.11e-37	2.16e-37	-2.88467	Down
9985	2354	1111	7042	0	0	-2.88346	Down
23705	4324	20704	131141	0	0	-2.88248	Down
728262	1275	3	19	0.000101375	2.44e-05	-2.8823	Down
26952	598	3	19	0.000101375	2.44e-05	-2.8823	Down
50940	9285	765	4844	0	0	-2.88201	Down
8642	10759	828	5240	0	0	-2.8812	Down
23382	5075	9761	61735	0	0	-2.88033	Down
85439	12957	2173	13735	0	0	-2.87943	Down
3356	5442	221	1396	4.04e-243	4.54e-243	-2.87852	Down
146330	3543	679	4283	0	0	-2.87648	Down
6538	1991	230	1450	3.41e-252	3.9e-252	-2.87569	Down
440193	7573	327	2061	0	0	-2.87532	Down
774	9805	146	920	9.75e-161	8.43e-161	-2.875	Down
643763	7056	31	195	1.75e-35	7.28e-36	-2.87247	Down
348980	9685	100	629	1.99e-110	1.38e-110	-2.8724	Down
23209	3960	331	2081	0	0	-2.87171	Down
84694	1632	7	44	3.54e-09	9.8e-10	-2.87141	Down
221692	2896	102	641	1.9e-112	1.34e-112	-2.87109	Down
57817	430	46	289	1.03e-51	5e-52	-2.8707	Down
6401	3875	18	113	3.11e-21	1.08e-21	-2.86959	Down
100133172	775	18	113	3.11e-21	1.08e-21	-2.86959	Down
81035	3134	4516	28300	0	0	-2.86702	Down
54360	1019	722	4520	0	0	-2.86559	Down
347475	1299	87	544	1.73e-95	1.13e-95	-2.86386	Down
84174	2569	4	25	8.82e-06	2.21e-06	-2.86319	Down
57094	1907	1800	11238	0	0	-2.86165	Down
2039	2825	544	3395	0	0	-2.86107	Down
11322	2891	835	5206	0	0	-2.85967	Down
64084	4882	8948	55781	0	0	-2.85947	Down
100499467	2275	2076	12921	0	0	-2.85718	Down
59084	2943	1420	8836	0	0	-2.85684	Down
126567	3124	146	908	1.25e-157	1.07e-157	-2.85606	Down
100128511	575	10	62	2.86e-12	8.49e-13	-2.85161	Down
55282	2416	16	99	1.13e-18	3.78e-19	-2.84869	Down
658	5560	1056	6528	0	0	-2.84737	Down
114822	3795	461	2848	0	0	-2.84645	Down
552	7844	126	778	7.37e-135	5.76e-135	-2.84568	Down
7686	1633	29	179	2.06e-32	8.28e-33	-2.84517	Down
148398	2575	419	2583	0	0	-2.84336	Down
150244	2548	675	4155	0	0	-2.84123	Down
160364	1619	8	49	6.03e-10	1.7e-10	-2.83405	Down
116933	2045	50	306	6.02e-54	2.99e-54	-2.83287	Down
11156	1396	587	3586	0	0	-2.83028	Down
57512	6663	2158	13179	0	0	-2.82981	Down
51059	6962	218	1330	1.11e-227	1.2e-227	-2.82836	Down
134111	6129	119	726	3.28e-125	2.45e-125	-2.82835	Down
130576	1600	1559	9509	0	0	-2.82801	Down
83690	4334	1024	6245	0	0	-2.82782	Down
400619	2265	48	292	2.09e-51	1.02e-51	-2.8242	Down
4625	6044	24	146	1.48e-26	5.53e-27	-2.8242	Down
93082	1704	26	158	1.37e-28	5.27e-29	-2.82268	Down
401399	3562	27	164	1.32e-29	5.16e-30	-2.822	Down
643008	4368	41	249	4.64e-44	2.12e-44	-2.82179	Down
5126	4787	1831	11111	0	0	-2.82062	Down
220296	3563	16	97	3.77e-18	1.25e-18	-2.81925	Down
27087	3666	782	4723	0	0	-2.8138	Down
79632	4057	179	1080	3.24e-184	3.04e-184	-2.81234	Down
8404	3058	1554	9342	0	0	-2.80708	Down
4821	2095	6	36	1.31e-07	3.49e-08	-2.8043	Down
2788	4264	1395	8370	0	0	-2.8043	Down
619569	132	2	12	0.0023145	0.00052105	-2.8043	Down
441864	897	1	6	0.0312192	0.00643441	-2.8043	Down
100131208	2959	2	12	0.0023145	0.00052105	-2.8043	Down
140628	2595	2	12	0.0023145	0.00052105	-2.8043	Down
5948	700	1	6	0.0312192	0.00643441	-2.8043	Down
100873941	513	1	6	0.0312192	0.00643441	-2.8043	Down
8852	2881	4	24	1.64e-05	4.08e-06	-2.8043	Down
645090	2915	2	12	0.0023145	0.00052105	-2.8043	Down
440829	1405	3	18	0.000190494	4.53e-05	-2.8043	Down
2301	2000	2	12	0.0023145	0.00052105	-2.8043	Down
283150	1215	1	6	0.0312192	0.00643441	-2.8043	Down
4014	1229	1	6	0.0312192	0.00643441	-2.8043	Down
283999	2509	1	6	0.0312192	0.00643441	-2.8043	Down
55879	2000	13	78	8.02e-15	2.5e-15	-2.8043	Down
127066	939	1	6	0.0312192	0.00643441	-2.8043	Down
140679	2581	4	24	1.64e-05	4.08e-06	-2.8043	Down
53841	3489	4	24	1.64e-05	4.08e-06	-2.8043	Down
100133050	701	4	24	1.64e-05	4.08e-06	-2.8043	Down
170589	774	1	6	0.0312192	0.00643441	-2.8043	Down
100287466	1747	2	12	0.0023145	0.00052105	-2.8043	Down
344191	1617	1	6	0.0312192	0.00643441	-2.8043	Down
677793	135	1	6	0.0312192	0.00643441	-2.8043	Down
7855	6584	4116	24658	0	0	-2.80208	Down
1583	2010	93	557	1.32e-95	8.57e-96	-2.80171	Down
2262	2904	49	293	3.98e-51	1.93e-51	-2.79939	Down
161145	4068	636	3796	0	0	-2.79672	Down
8277	2652	29	173	7.38e-31	2.92e-31	-2.79599	Down
8153	4169	634	3782	0	0	-2.79593	Down
122060	2855	3467	20669	0	0	-2.79505	Down
124590	3561	24	143	8.86e-26	3.28e-26	-2.79425	Down
219731	3163	47	280	7.62e-49	3.62e-49	-2.79403	Down
1143	2448	17	101	1.19e-18	3.97e-19	-2.79009	Down
4054	4721	50761	301484	0	0	-2.78963	Down
3625	3218	81	481	1.87e-82	1.13e-82	-2.78938	Down
10317	2871	16	95	1.25e-17	4.1e-18	-2.78919	Down
100131980	925	14	83	1.38e-15	4.38e-16	-2.78702	Down
345557	7739	141	835	1.68e-141	1.35e-141	-2.78542	Down
10406	570	37	219	1.86e-38	7.97e-39	-2.78467	Down
4914	2663	12	71	1.55e-13	4.71e-14	-2.78412	Down
7294	2914	93	549	1.5e-93	9.61e-94	-2.78084	Down
7060	3233	322	1898	0	0	-2.77869	Down
23769	3252	87	512	3.11e-87	1.93e-87	-2.77639	Down
9832	9201	666	3919	0	0	-2.77623	Down
148808	4114	93	547	4.88e-93	3.12e-93	-2.77558	Down
55859	862	16200	95186	0	0	-2.77409	Down
84631	4417	3287	19298	0	0	-2.77295	Down
84249	4527	244	1432	4.91e-240	5.46e-240	-2.77242	Down
1589	2131	56	328	2.07e-56	1.05e-56	-2.76954	Down
55244	3279	469	2745	0	0	-2.76848	Down
130574	4111	816	4775	0	0	-2.7682	Down
80036	6288	916	5360	0	0	-2.76815	Down
643596	1514	19	111	3.58e-20	1.22e-20	-2.76583	Down
23145	15580	289	1686	2.52e-281	3.09e-281	-2.7638	Down
51050	6732	1051	6131	0	0	-2.7637	Down
283177	2737	6	35	2.42e-07	6.36e-08	-2.76366	Down
79679	2742	18	105	3.75e-19	1.26e-19	-2.76366	Down
5322	1911	142	828	3.53e-139	2.8e-139	-2.76308	Down
123036	5030	249	1449	9.4e-242	1.05e-241	-2.76018	Down
342125	3303	31	180	1.34e-31	5.34e-32	-2.75699	Down
116173	1217	30	174	1.39e-30	5.46e-31	-2.75539	Down
3293	1134	40	232	3.27e-40	1.43e-40	-2.75539	Down
378832	3425	19	110	6.5e-20	2.21e-20	-2.75277	Down
400759	1234	19	110	6.5e-20	2.21e-20	-2.75277	Down
440034	1656	14	81	4.57e-15	1.43e-15	-2.75183	Down
27159	1739	9	52	3.43e-10	9.73e-11	-2.74985	Down
139599	2257	22	127	1.03e-22	3.67e-23	-2.74859	Down
202309	2216	17	98	7.12e-18	2.34e-18	-2.74659	Down
57221	14895	2753	15868	0	0	-2.74638	Down
730198	4115	8	46	3.71e-09	1.03e-09	-2.7429	Down
10249	2068	4	23	3.05e-05	7.49e-06	-2.7429	Down
3713	2165	16	92	7.48e-17	2.42e-17	-2.7429	Down
51196	7992	5825	33480	0	0	-2.74231	Down
441389	2347	139	798	4.37e-133	3.38e-133	-2.74064	Down
2875	1896	77	442	1.43e-74	8.24e-75	-2.74045	Down
5949	4289	19	109	1.18e-19	3.98e-20	-2.73959	Down
124739	4180	412	2362	0	0	-2.73863	Down
284525	4427	11	63	5.45e-12	1.61e-12	-2.73719	Down
135398	1696	51	292	8.18e-50	3.92e-50	-2.73674	Down
2719	2398	127	727	3.13e-121	2.3e-121	-2.73646	Down
154215	3315	226	1292	1.04e-213	1.08e-213	-2.73455	Down
29887	2712	4748	27128	0	0	-2.73373	Down
78997	2855	23	131	3.25e-23	1.16e-23	-2.7292	Down
83543	3533	8992	51199	0	0	-2.72874	Down
7401	2550	1285	7310	0	0	-2.72744	Down
8715	3968	155	879	2.08e-145	1.69e-145	-2.72293	Down
157556	496	3	17	0.000356713	8.38e-05	-2.72184	Down
2865	1709	12	68	9.31e-13	2.79e-13	-2.72184	Down
441151	4637	9	51	6.26e-10	1.76e-10	-2.72184	Down
219464	1080	3	17	0.000356713	8.38e-05	-2.72184	Down
221981	10607	235	1331	5.73e-219	6.03e-219	-2.72112	Down
401720	4711	61	345	3.84e-58	1.97e-58	-2.71905	Down
1588	4531	254	1434	2.5e-235	2.74e-235	-2.71648	Down
445	1863	12572	70975	0	0	-2.71643	Down
2747	2348	152	857	2.3e-141	1.84e-141	-2.71456	Down
5521	2376	1715	9657	0	0	-2.7127	Down
92370	3198	3729	20955	0	0	-2.70977	Down
64699	3218	155	869	7.23e-143	5.83e-143	-2.70643	Down
124925	4250	60	336	2.29e-56	1.16e-56	-2.70476	Down
645121	2355	56	313	1.41e-52	6.94e-53	-2.702	Down
84970	3005	43	240	1.08e-40	4.72e-41	-2.69996	Down
57718	3868	216	1204	1.64e-196	1.6e-196	-2.69807	Down
284729	2015	7	39	7.38e-08	1.98e-08	-2.69739	Down
56062	5880	1056	5870	0	0	-2.69409	Down
79605	3373	420	2334	0	0	-2.69368	Down
127707	5070	231	1283	7.59e-209	7.72e-209	-2.69289	Down
29106	3366	212	1177	1.01e-191	9.73e-192	-2.69232	Down
9350	1206	11	61	1.8e-11	5.24e-12	-2.69064	Down
174	2032	158	874	1.35e-142	1.08e-142	-2.68705	Down
79730	3711	195	1077	4.32e-175	3.93e-175	-2.68481	Down
445577	1154	46	254	1.03e-42	4.62e-43	-2.68446	Down
89765	1382	92	508	1.29e-83	7.85e-84	-2.68446	Down
4332	1670	825	4548	0	0	-2.6821	Down
4920	4099	209	1152	6.33e-187	6e-187	-2.6819	Down
390648	939	2	11	0.00440509	0.00097436	-2.67877	Down
763	1084	2	11	0.00440509	0.00097436	-2.67877	Down
6344	1833	2	11	0.00440509	0.00097436	-2.67877	Down
343702	2929	2	11	0.00440509	0.00097436	-2.67877	Down
649264	880	2	11	0.00440509	0.00097436	-2.67877	Down
100533181	1184	2	11	0.00440509	0.00097436	-2.67877	Down
150572	4441	4	22	5.65e-05	1.37e-05	-2.67877	Down
50805	2229	2	11	0.00440509	0.00097436	-2.67877	Down
64405	3914	8	44	1.23e-08	3.37e-09	-2.67877	Down
222256	6500	98	539	2.1e-88	1.31e-88	-2.67877	Down
9312	3597	59	324	7.83e-54	3.89e-54	-2.67655	Down
65009	3581	3789	20792	0	0	-2.67548	Down
9142	2459	210	1150	6.53e-186	6.16e-186	-2.67251	Down
7096	2867	488	2672	0	0	-2.67231	Down
84944	1731	135	739	3.65e-120	2.67e-120	-2.67195	Down
51361	5865	1288	7035	0	0	-2.66876	Down
6349	804	26	142	1.78e-24	6.47e-25	-2.66865	Down
10882	1517	1970	10722	0	0	-2.66364	Down
388228	5010	85	462	1.54e-75	8.93e-76	-2.6617	Down
285668	2970	14	76	8.88e-14	2.72e-14	-2.65991	Down
3780	2662	63	341	4.2e-56	2.12e-56	-2.65569	Down
10178	12907	61	330	2.46e-54	1.23e-54	-2.65492	Down
9071	2658	533	2881	0	0	-2.6537	Down
55349	3711	294	1589	3.86e-254	4.44e-254	-2.65357	Down
1066	2027	3306	17864	0	0	-2.65323	Down
79315	1255	5	27	9.1e-06	2.28e-06	-2.6523	Down
80310	3997	699	3769	0	0	-2.65016	Down
57596	2763	116	623	1.67e-100	1.11e-100	-2.64445	Down
644150	4195	106	569	6.24e-92	3.96e-92	-2.6437	Down
159989	2698	197	1057	4.92e-169	4.39e-169	-2.64305	Down
23263	6456	228	1223	3.17e-195	3.08e-195	-2.64266	Down
51090	1514	44	236	3.59e-39	1.55e-39	-2.64255	Down
197021	2128	1107	5936	0	0	-2.64217	Down
340533	11727	186	996	3.27e-159	2.81e-159	-2.64018	Down
4345	2301	1818	9717	0	0	-2.6375	Down
22871	4918	1722	9192	0	0	-2.63563	Down
6261	15391	367	1958	0	0	-2.63487	Down
116449	1710	3	16	0.000665294	0.000154015	-2.63438	Down
138046	2919	45	240	1.12e-39	4.87e-40	-2.63438	Down
85508	3594	6	32	1.48e-06	3.81e-07	-2.63438	Down
343472	1496	3	16	0.000665294	0.000154015	-2.63438	Down
7074	7218	1419	7561	0	0	-2.63304	Down
162494	4688	120	639	1.6e-102	1.07e-102	-2.63212	Down
57633	3823	3964	21087	0	0	-2.63066	Down
23251	6742	3022	16069	0	0	-2.63004	Down
8528	1733	262	1393	6.44e-221	6.83e-221	-2.62989	Down
84435	4298	13	69	1.69e-12	5.05e-13	-2.62742	Down
10580	7226	8110	43030	0	0	-2.62691	Down
283385	1172	82	435	3.04e-70	1.69e-70	-2.62666	Down
5129	3212	2200	11668	0	0	-2.62632	Down
80332	3594	686	3635	0	0	-2.62501	Down
26053	6426	1310	6935	0	0	-2.62367	Down
55	3223	31	164	1.6e-27	6.06e-28	-2.62269	Down
79054	5621	62	328	2.49e-53	1.23e-53	-2.62269	Down
150084	2066	49	259	1.84e-42	8.23e-43	-2.62144	Down
11181	1874	11	58	1.06e-10	3.04e-11	-2.61789	Down
100130519	1930	464	2442	0	0	-2.6152	Down
83723	1943	62	326	7.93e-53	3.91e-53	-2.61387	Down
7652	7881	20	105	4.04e-18	1.33e-18	-2.61166	Down
50652	3735	4	21	0.000104107	2.51e-05	-2.61166	Down
51198	616	4	21	0.000104107	2.51e-05	-2.61166	Down
6656	4108	4	21	0.000104107	2.51e-05	-2.61166	Down
1768	12795	85	446	1.64e-71	9.21e-72	-2.61085	Down
9760	4131	2321	12165	0	0	-2.60926	Down
1268	5901	575	3012	0	0	-2.60843	Down
441027	1888	299	1566	7.1e-246	8.01e-246	-2.6082	Down
57453	6899	24	125	3.54e-21	1.23e-21	-2.60016	Down
159686	3313	421	2191	0	0	-2.59904	Down
4974	1945	187	973	5.94e-153	4.99e-153	-2.59874	Down
100216001	1394	20	104	7.23e-18	2.38e-18	-2.59785	Down
1961	2379	10	52	1.14e-09	3.18e-10	-2.59785	Down
23632	1757	163	846	4.74e-133	3.67e-133	-2.59512	Down
57834	3395	144	747	1.12e-117	8.1e-118	-2.59438	Down
164395	1607	16	83	1.5e-14	4.67e-15	-2.59438	Down
23601	3524	266	1377	6.17e-215	6.42e-215	-2.59137	Down
9120	3955	235	1216	5.32e-190	5.08e-190	-2.59075	Down
2334	13746	201	1040	8.6e-163	7.5e-163	-2.59065	Down
9080	2139	6	31	2.7e-06	6.89e-07	-2.58857	Down
9705	6330	30	155	9.4e-26	3.48e-26	-2.58857	Down
84624	6578	2669	13783	0	0	-2.58786	Down
387890	1573	104	536	1.19e-84	7.25e-85	-2.58499	Down
114	4145	33	170	4.87e-28	1.86e-28	-2.58433	Down
57578	8471	218	1123	3.77e-175	3.43e-175	-2.5843	Down
114899	3843	1203	6194	0	0	-2.58357	Down
2173	1005	5203	26780	0	0	-2.58308	Down
5669	2306	979	5035	0	0	-2.58195	Down
4645	9520	2099	10795	0	0	-2.58193	Down
153657	1369	21	108	2.22e-18	7.36e-19	-2.58191	Down
55065	2429	35	180	1.46e-29	5.69e-30	-2.58191	Down
85442	6773	256	1314	3.89e-204	3.91e-204	-2.57909	Down
100505676	4372	24	123	1.13e-20	3.89e-21	-2.57689	Down
284467	1144	17	87	4.6e-15	1.44e-15	-2.57482	Down
65987	1688	28	143	9.99e-24	3.6e-24	-2.57185	Down
51332	11739	597	3047	0	0	-2.57092	Down
139728	1888	204	1040	2.51e-161	2.18e-161	-2.56928	Down
126669	6186	44	224	3.71e-36	1.55e-36	-2.56726	Down
83657	506	58	295	4.86e-47	2.27e-47	-2.56593	Down
100188954	2651	25	127	3.47e-21	1.2e-21	-2.56417	Down
60677	3418	189	960	9.78e-149	8.07e-149	-2.56399	Down
11076	6039	367	1861	4.49e-286	5.55e-286	-2.56156	Down
84978	2261	2317	11749	0	0	-2.56155	Down
23768	7185	7568	38348	0	0	-2.56051	Down
3381	1595	1093	5527	0	0	-2.55754	Down
6496	2533	3011	15179	0	0	-2.5531	Down
2850	1128	26	131	1.06e-21	3.72e-22	-2.55232	Down
399668	3456	324	1622	1.29e-247	1.46e-247	-2.54305	Down
56853	4070	56	280	2.81e-44	1.28e-44	-2.54127	Down
492307	1993	4	20	0.000191147	4.55e-05	-2.54127	Down
114824	3218	2	10	0.00834412	0.00180739	-2.54127	Down
100133234	6125	4	20	0.000191147	4.55e-05	-2.54127	Down
375567	1918	3	15	0.00123507	0.000282141	-2.54127	Down
100049587	2113	3	15	0.00123507	0.000282141	-2.54127	Down
171169	978	2	10	0.00834412	0.00180739	-2.54127	Down
4985	1774	2	10	0.00834412	0.00180739	-2.54127	Down
138802	963	3	15	0.00123507	0.000282141	-2.54127	Down
100507194	1472	5	25	3.04e-05	7.45e-06	-2.54127	Down
158035	2913	2	10	0.00834412	0.00180739	-2.54127	Down
400591	3997	2	10	0.00834412	0.00180739	-2.54127	Down
730291	1239	2	10	0.00834412	0.00180739	-2.54127	Down
729665	2610	4	20	0.000191147	4.55e-05	-2.54127	Down
401447	1593	2	10	0.00834412	0.00180739	-2.54127	Down
119548	2309	3	15	0.00123507	0.000282141	-2.54127	Down
859	1435	2	10	0.00834412	0.00180739	-2.54127	Down
285242	2154	2	10	0.00834412	0.00180739	-2.54127	Down
200959	1521	4	20	0.000191147	4.55e-05	-2.54127	Down
145781	4662	2	10	0.00834412	0.00180739	-2.54127	Down
8190	654	3	15	0.00123507	0.000282141	-2.54127	Down
390081	939	2	10	0.00834412	0.00180739	-2.54127	Down
6906	1600	2	10	0.00834412	0.00180739	-2.54127	Down
643224	2660	19	95	4.28e-16	1.37e-16	-2.54127	Down
100128573	525	3	15	0.00123507	0.000282141	-2.54127	Down
283710	1040	2	10	0.00834412	0.00180739	-2.54127	Down
2277	2084	2	10	0.00834412	0.00180739	-2.54127	Down
1008	3440	200	998	7.62e-153	6.39e-153	-2.53838	Down
590	2461	1135	5656	0	0	-2.53643	Down
1600	2580	312	1554	1.45e-236	1.6e-236	-2.53571	Down
4293	5602	457	2275	0	0	-2.53494	Down
6857	4841	3902	19369	0	0	-2.5308	Down
143162	5024	27	134	5.79e-22	2.03e-22	-2.53054	Down
83450	2183	241	1196	3.95e-182	3.68e-182	-2.53045	Down
846	5011	25	124	1.95e-20	6.69e-21	-2.52968	Down
10485	879	992	4919	0	0	-2.52929	Down
131096	5106	68	337	1.22e-52	5.99e-53	-2.52848	Down
651430	2459	22	109	3.84e-18	1.27e-18	-2.52809	Down
1590	2429	120	593	4.64e-91	2.93e-91	-2.52434	Down
83482	3552	14	69	5.31e-12	1.57e-12	-2.52051	Down
5919	767	2564	12631	0	0	-2.51984	Down
339302	1980	13	64	3.13e-11	9.09e-12	-2.5189	Down
11320	8382	888	4369	0	0	-2.51801	Down
7093	6788	3318	16323	0	0	-2.51786	Down
5588	3286	75	368	5.82e-57	2.96e-57	-2.51408	Down
400046	3181	10	49	6.58e-09	1.81e-09	-2.51212	Down
118442	2206	10	49	6.58e-09	1.81e-09	-2.51212	Down
254778	3471	256	1253	4.89e-189	4.66e-189	-2.51051	Down
283089	2500	28	137	3.14e-22	1.11e-22	-2.51002	Down
9362	2018	9	44	3.94e-08	1.06e-08	-2.50884	Down
387978	3154	18	88	7.93e-15	2.48e-15	-2.50884	Down
54857	2443	189	923	1.38e-139	1.09e-139	-2.50728	Down
677766	420	17	83	4.65e-14	1.43e-14	-2.50691	Down
131368	3639	292	1425	2.71e-214	2.82e-214	-2.50626	Down
54549	10796	401	1956	2.94e-293	3.69e-293	-2.50557	Down
57731	8705	561	2730	0	0	-2.50217	Down
128853	1383	171	831	1.78e-125	1.33e-125	-2.50019	Down
5222	1398	7	34	1.45e-06	3.71e-07	-2.49945	Down
6886	5018	7	34	1.45e-06	3.71e-07	-2.49945	Down
10858	2138	348	1690	6.02e-253	6.9e-253	-2.4992	Down
28316	2855	292	1415	7.77e-212	8e-212	-2.4961	Down
4211	3198	1152	5581	0	0	-2.49572	Down
287	14243	10820	52345	0	0	-2.49369	Down
23732	1189	55	266	2.72e-41	1.2e-41	-2.49326	Down
1573	1876	230	1112	1.14e-166	1.01e-166	-2.49279	Down
79628	26588	1025	4955	0	0	-2.4926	Down
79012	3028	6	29	8.87e-06	2.22e-06	-2.49236	Down
220107	1180	6	29	8.87e-06	2.22e-06	-2.49236	Down
4281	6463	7082	34227	0	0	-2.49224	Down
85416	4607	481	2320	0	0	-2.48935	Down
51302	2288	323	1556	7.71e-232	8.39e-232	-2.48757	Down
57482	7013	2019	9726	0	0	-2.48754	Down
80217	5365	92	443	2.19e-67	1.2e-67	-2.48694	Down
969	1676	16	77	4.85e-13	1.46e-13	-2.48612	Down
5414	2381	1179	5673	0	0	-2.48589	Down
26052	7659	1730	8324	0	0	-2.48584	Down
29841	3610	68	327	3.57e-50	1.71e-50	-2.48502	Down
100129792	3491	541	2600	0	0	-2.48415	Down
84707	1100	1010	4851	0	0	-2.48326	Down
54769	4107	1079	5182	0	0	-2.48315	Down
29842	9306	111	533	1.49e-80	8.93e-81	-2.48291	Down
284186	3335	5	24	5.51e-05	1.34e-05	-2.48237	Down
9620	11389	4370	20967	0	0	-2.48175	Down
2678	2431	306	1468	2.97e-218	3.13e-218	-2.48159	Down
51440	4277	129	618	5.92e-93	3.78e-93	-2.47957	Down
80059	3623	57	273	4.51e-42	2.01e-42	-2.47921	Down
84466	7689	2835	13574	0	0	-2.47876	Down
135932	2161	283	1355	2.35e-201	2.34e-201	-2.47876	Down
654790	1480	28	134	1.74e-21	6.07e-22	-2.47807	Down
5798	3801	685	3276	0	0	-2.4771	Down
2053	2290	684	3269	0	0	-2.47612	Down
9957	1965	610	2903	0	0	-2.47	Down
10382	2318	1356	6450	0	0	-2.46928	Down
1795	8777	1616	7681	0	0	-2.46821	Down
100073347	1288	4	19	0.000349342	8.21e-05	-2.46727	Down
2831	987	4	19	0.000349342	8.21e-05	-2.46727	Down
653643	3449	4	19	0.000349342	8.21e-05	-2.46727	Down
429	2490	131	622	5.33e-93	3.41e-93	-2.46669	Down
23043	5816	3771	17900	0	0	-2.46628	Down
65266	4194	2078	9856	0	0	-2.46514	Down
112885	3671	97	460	3.26e-69	1.81e-69	-2.46492	Down
9413	2423	946	4486	0	0	-2.46486	Down
6658	2074	151	716	1.15e-106	7.85e-107	-2.46475	Down
203447	8080	1411	6687	0	0	-2.46398	Down
283078	3658	111	525	1.36e-78	8.01e-79	-2.4611	Down
3818	2252	118	558	2.1e-83	1.28e-83	-2.46082	Down
144568	5192	33	156	1.47e-24	5.34e-25	-2.46035	Down
50846	1971	36	170	1.34e-26	5.01e-27	-2.4588	Down
4045	9478	3448	16277	0	0	-2.45834	Down
494470	5276	25	118	6e-19	2.01e-19	-2.45812	Down
51412	1550	7	33	2.6e-06	6.62e-07	-2.45638	Down
2201	10724	23205	109187	0	0	-2.45363	Down
26049	5990	3069	14411	0	0	-2.45067	Down
202374	1693	46	216	3.17e-33	1.28e-33	-2.45066	Down
2566	4077	23	108	2.03e-17	6.64e-18	-2.45066	Down
338651	2266	59	277	4.05e-42	1.81e-42	-2.45044	Down
10647	454	16	75	1.52e-12	4.54e-13	-2.44816	Down
4897	6406	23880	111864	0	0	-2.44721	Down
165186	3564	28	131	9.54e-21	3.28e-21	-2.44541	Down
57477	9571	2575	12025	0	0	-2.44273	Down
100507500	2821	6	28	1.6e-05	3.97e-06	-2.44173	Down
100289673	1266	3	14	0.00228053	0.000513684	-2.44173	Down
151647	2294	6	28	1.6e-05	3.97e-06	-2.44173	Down
6278	450	3	14	0.00228053	0.000513684	-2.44173	Down
10281	1102	6	28	1.6e-05	3.97e-06	-2.44173	Down
1144	2963	6	28	1.6e-05	3.97e-06	-2.44173	Down
100463285	1231	9	42	1.26e-07	3.35e-08	-2.44173	Down
284260	3376	9	42	1.26e-07	3.35e-08	-2.44173	Down
55016	5502	3417	15893	0	0	-2.43693	Down
2662	2658	60	279	3.81e-42	1.7e-42	-2.43657	Down
11095	3679	62	288	2.03e-43	9.17e-44	-2.43507	Down
341277	1894	72	334	5.01e-50	2.4e-50	-2.43312	Down
6817	1609	1403	6507	0	0	-2.43282	Down
1996	2101	11	51	6.23e-09	1.72e-09	-2.43233	Down
56098	4623	110	509	3.72e-75	2.14e-75	-2.4295	Down
100507086	1703	59	273	3.83e-41	1.69e-41	-2.42945	Down
374569	1972	8	37	7.62e-07	1.97e-07	-2.42879	Down
10439	2879	1359	6284	0	0	-2.42848	Down
8622	4405	2656	12251	0	0	-2.42491	Down
148713	4095	18	83	1.38e-13	4.2e-14	-2.42445	Down
108	6553	99	456	2.57e-67	1.41e-67	-2.42287	Down
50848	4830	2165	9958	0	0	-2.42083	Down
9619	3142	431	1982	1.11e-285	1.38e-285	-2.42054	Down
57495	7477	34	156	4.26e-24	1.54e-24	-2.41728	Down
4547	4093	361	1656	1.22e-238	1.35e-238	-2.41697	Down
23508	5217	1163	5334	0	0	-2.4167	Down
100132677	2603	12	55	1.86e-09	5.17e-10	-2.41574	Down
2572	2824	55	252	7.27e-38	3.1e-38	-2.41526	Down
9024	4563	388	1774	6.52e-255	7.51e-255	-2.41222	Down
7039	4326	7526	34406	0	0	-2.41204	Down
644943	2698	7	32	4.65e-06	1.17e-06	-2.41198	Down
130749	1209	14	64	9.34e-11	2.68e-11	-2.41198	Down
7546	2991	557	2544	0	0	-2.41069	Down
8437	3841	397	1813	2.96e-260	3.45e-260	-2.41051	Down
79953	2437	885	4041	0	0	-2.4103	Down
1301	7327	122881	560741	0	0	-2.40941	Down
11326	2209	326	1487	1.15e-213	1.19e-213	-2.4088	Down
23302	5827	2411	10992	0	0	-2.40809	Down
340348	2900	560	2549	0	0	-2.40577	Down
100128811	2433	20	91	1.25e-14	3.88e-15	-2.4052	Down
9635	4043	118	536	4.67e-78	2.74e-78	-2.40278	Down
26011	13566	5729	26022	0	0	-2.40271	Down
80054	2281	49	222	2.6e-33	1.06e-33	-2.39904	Down
374739	1638	27	122	5.27e-19	1.76e-19	-2.39519	Down
653483	2311	43	194	3.07e-29	1.19e-29	-2.39299	Down
23542	3381	412	1857	4.24e-264	4.98e-264	-2.3916	Down
1734	6379	37001	166617	0	0	-2.39024	Down
100505478	731	2	9	0.0157107	0.00332646	-2.38926	Down
100130231	5338	2	9	0.0157107	0.00332646	-2.38926	Down
168090	1852	4	18	0.00063518	0.000147147	-2.38926	Down
791114	1451	2	9	0.0157107	0.00332646	-2.38926	Down
4680	2631	2	9	0.0157107	0.00332646	-2.38926	Down
3238	813	2	9	0.0157107	0.00332646	-2.38926	Down
100528007	2732	4	18	0.00063518	0.000147147	-2.38926	Down
23520	705	2	9	0.0157107	0.00332646	-2.38926	Down
29065	1179	2	9	0.0157107	0.00332646	-2.38926	Down
440452	2086	2	9	0.0157107	0.00332646	-2.38926	Down
497189	1285	4	18	0.00063518	0.000147147	-2.38926	Down
7069	1182	2	9	0.0157107	0.00332646	-2.38926	Down
729993	6738	10569	47555	0	0	-2.3891	Down
55553	8979	1659	7446	0	0	-2.38549	Down
149297	1481	23	103	3.41e-16	1.09e-16	-2.38228	Down
23305	6554	335	1500	9.53e-213	9.83e-213	-2.38207	Down
414152	4837	40	179	5.84e-27	2.19e-27	-2.38123	Down
23217	4757	59	264	5.83e-39	2.52e-39	-2.38109	Down
100631378	1716	15	67	4.92e-11	1.42e-11	-2.37854	Down
100129654	2450	13	58	9.75e-10	2.73e-10	-2.37688	Down
4322	2735	141	629	3.9e-90	2.45e-90	-2.3767	Down
56884	4835	133	593	4.69e-85	2.87e-85	-2.37594	Down
65975	2707	1296	5778	0	0	-2.37584	Down
5915	3142	4556	20294	0	0	-2.37455	Down
116442	3499	705	3140	0	0	-2.37441	Down
84125	5460	144	641	1.11e-91	7.06e-92	-2.37359	Down
9227	4909	180	801	4.69e-114	3.33e-114	-2.37314	Down
1400	3155	4140	18416	0	0	-2.3726	Down
648809	1167	9	40	3.98e-07	1.04e-07	-2.37134	Down
5730	837	4897	21755	0	0	-2.37071	Down
27253	8009	402	1784	4.94e-251	5.64e-251	-2.36919	Down
23201	1834	5515	24474	0	0	-2.36916	Down
56899	4971	106	470	1.54e-67	8.43e-68	-2.36793	Down
83875	2925	242	1072	1.77e-151	1.48e-151	-2.36656	Down
1392	1434	7	31	8.29e-06	2.08e-06	-2.36618	Down
84440	8665	1157	5112	0	0	-2.36284	Down
140576	1085	10856	47953	0	0	-2.36247	Down
27293	1890	96	424	6.08e-61	3.18e-61	-2.3623	Down
89944	3178	946	4177	0	0	-2.36189	Down
79966	3108	14578	64276	0	0	-2.35983	Down
57469	4739	418	1840	2.39e-257	2.77e-257	-2.35747	Down
100874253	669	10	44	1.17e-07	3.11e-08	-2.35684	Down
3174	4101	5	22	0.00017938	4.28e-05	-2.35684	Down
286187	1111	23	101	1.04e-15	3.32e-16	-2.35399	Down
780	3877	40246	176535	0	0	-2.35237	Down
58512	3587	81	355	4.82e-51	2.33e-51	-2.35116	Down
143903	2772	10826	47442	0	0	-2.351	Down
2775	6229	766	3356	0	0	-2.35066	Down
55607	10519	3295	14416	0	0	-2.34866	Down
22797	6700	445	1945	1.6e-270	1.91e-270	-2.34723	Down
25837	1641	155	677	1.98e-95	1.28e-95	-2.34623	Down
6549	5446	33	144	1.22e-21	4.28e-22	-2.34487	Down
283731	2566	25	109	9.46e-17	3.05e-17	-2.34367	Down
100506810	3793	25	109	9.46e-17	3.05e-17	-2.34367	Down
5158	3414	323	1408	4.87e-196	4.74e-196	-2.34338	Down
283229	1838	271	1180	1.7e-164	1.49e-164	-2.34176	Down
11249	2560	54	235	3.29e-34	1.35e-34	-2.34097	Down
89832	2858	87	378	6.66e-54	3.31e-54	-2.33864	Down
5662	4185	337	1463	5.21e-203	5.22e-203	-2.33745	Down
127391	741	3	13	0.00418477	0.000927282	-2.33482	Down
284422	908	6	26	5.12e-05	1.25e-05	-2.33482	Down
3110	2176	3	13	0.00418477	0.000927282	-2.33482	Down
200010	3293	6	26	5.12e-05	1.25e-05	-2.33482	Down
8513	1537	3	13	0.00418477	0.000927282	-2.33482	Down
9515	9382	28	121	2.58e-18	8.55e-19	-2.33085	Down
10154	7346	621	2683	0	0	-2.33052	Down
241	1242	336	1451	1.37e-200	1.36e-200	-2.32985	Down
3127	1171	1073	4626	0	0	-2.32745	Down
89932	5849	3968	17093	0	0	-2.32626	Down
8556	4287	1199	5158	0	0	-2.32432	Down
57524	5695	228	980	1.12e-135	8.8e-136	-2.32309	Down
283514	4005	71	305	1.74e-43	7.89e-44	-2.32226	Down
9951	3203	17	73	1.34e-11	3.93e-12	-2.3217	Down
55636	11589	2053	8811	0	0	-2.32091	Down
480	3912	7	30	1.47e-05	3.66e-06	-2.31887	Down
2015	3161	25	107	2.87e-16	9.2e-17	-2.31695	Down
8659	3399	11763	50266	0	0	-2.31466	Down
1394	2714	11	47	6.06e-08	1.63e-08	-2.3145	Down
137902	4812	364	1555	4.09e-213	4.22e-213	-2.31424	Down
51816	3947	3262	13914	0	0	-2.31205	Down
116931	10349	833	3553	0	0	-2.31199	Down
84709	1339	13498	57496	0	0	-2.31005	Down
1908	2694	8	34	4.26e-06	1.08e-06	-2.3068	Down
79742	4735	8	34	4.26e-06	1.08e-06	-2.3068	Down
8503	5693	5295	22451	0	0	-2.30342	Down
5803	8169	1073	4549	0	0	-2.30324	Down
169693	1284	17	72	2.35e-11	6.83e-12	-2.3018	Down
2674	9580	29281	123848	0	0	-2.29987	Down
125113	1735	319	1347	2.69e-183	2.51e-183	-2.29746	Down
796	916	9	38	1.24e-06	3.19e-07	-2.29734	Down
85300	5049	80	337	3.44e-47	1.61e-47	-2.29401	Down
6489	9737	494	2079	4.73e-281	5.8e-281	-2.29264	Down
6450	1246	1384	5824	0	0	-2.2925	Down
121551	5760	556	2338	0	0	-2.29146	Down
57699	3339	25	105	8.65e-16	2.75e-16	-2.28973	Down
389033	401	15	63	4.63e-10	1.31e-10	-2.28973	Down
29993	4341	50	210	5.46e-30	2.14e-30	-2.28973	Down
79412	2068	25	105	8.65e-16	2.75e-16	-2.28973	Down
401237	1904	200	839	2.28e-114	1.62e-114	-2.28801	Down
3083	2038	36	151	5.3e-22	1.86e-22	-2.28782	Down
1525	5744	1077	4515	0	0	-2.28705	Down
23580	3121	7578	31756	0	0	-2.28648	Down
100129583	1627	84	352	5.05e-49	2.4e-49	-2.28645	Down
114798	5201	32	134	1.11e-19	3.76e-20	-2.28543	Down
51268	2412	635	2659	0	0	-2.28539	Down
7433	3185	123	515	7.72e-71	4.32e-71	-2.28525	Down
89790	3400	81	339	3.11e-47	1.45e-47	-2.28463	Down
339896	3655	11	46	1.06e-07	2.83e-08	-2.28347	Down
63951	2302	234	978	1.28e-132	9.9e-133	-2.28266	Down
146845	2207	28	117	2.34e-17	7.65e-18	-2.28235	Down
26266	2908	216	902	2.18e-122	1.61e-122	-2.28143	Down
51411	2228	131	547	5.68e-75	3.27e-75	-2.28131	Down
400360	3080	60	250	3.55e-35	1.47e-35	-2.27823	Down
135138	1702	79	329	9.99e-46	4.62e-46	-2.2775	Down
388886	1240	784	3261	0	0	-2.27573	Down
2043	6364	918	3812	0	0	-2.27332	Down
7545	5231	2861	11880	0	0	-2.27328	Down
6539	3500	86	357	2.38e-49	1.14e-49	-2.27285	Down
55530	3486	20	83	1.08e-12	3.24e-13	-2.27245	Down
254887	3778	438	1816	5.28e-243	5.93e-243	-2.2711	Down
387712	2865	89	369	6.68e-51	3.23e-51	-2.27108	Down
10507	4642	706	2927	0	0	-2.27102	Down
400950	3721	7	29	2.6e-05	6.41e-06	-2.26996	Down
286223	4911	147	609	9.13e-83	5.52e-83	-2.26996	Down
5608	1879	141	584	1.97e-79	1.17e-79	-2.26961	Down
752	3973	334	1382	3.82e-185	3.59e-185	-2.26818	Down
252995	3035	399	1646	1.32e-219	1.39e-219	-2.26384	Down
89797	11188	9769	40245	0	0	-2.26186	Down
107	12499	856	3526	0	0	-2.26169	Down
27143	4601	699	2879	0	0	-2.26154	Down
22998	6182	9663	39736	0	0	-2.25924	Down
3662	5463	9	37	2.18e-06	5.56e-07	-2.25887	Down
8499	5424	254	1043	2.05e-139	1.63e-139	-2.25718	Down
375307	1414	19	78	6.29e-12	1.85e-12	-2.25681	Down
9104	2255	720	2955	0	0	-2.25643	Down
347689	3535	291	1194	3.29e-159	2.82e-159	-2.25605	Down
191585	10009	20	82	1.87e-12	5.59e-13	-2.25496	Down
1955	6227	21131	86535	0	0	-2.25326	Down
10309	1448	54	221	6.96e-31	2.75e-31	-2.25235	Down
283692	2168	11	45	1.86e-07	4.9e-08	-2.25176	Down
100131060	1123	11	45	1.86e-07	4.9e-08	-2.25176	Down
89837	1162	34	139	5.18e-20	1.77e-20	-2.25082	Down
80150	2424	732	2988	0	0	-2.2486	Down
225689	1904	38	155	4.27e-22	1.5e-22	-2.24753	Down
154386	2070	13	53	1.6e-08	4.37e-09	-2.24682	Down
130752	2332	238	970	4.74e-129	3.6e-129	-2.24636	Down
284759	2833	27	110	4.03e-16	1.29e-16	-2.24581	Down
283358	3438	42	171	3.54e-24	1.28e-24	-2.24487	Down
40	3470	59	240	3.04e-33	1.23e-33	-2.24359	Down
137209	3276	165	671	1.01e-89	6.38e-90	-2.24318	Down
151354	6366	862	3504	0	0	-2.24258	Down
399697	2695	17	69	1.23e-10	3.52e-11	-2.2404	Down
4316	1147	527	2137	1.03e-280	1.27e-280	-2.23905	Down
401431	3084	351	1422	2.31e-187	2.19e-187	-2.23772	Down
33	2565	146	591	5.73e-79	3.38e-79	-2.23653	Down
222389	2408	542	2193	1.62e-287	2.02e-287	-2.23588	Down
2905	4298	302	1221	6.49e-161	5.61e-161	-2.23478	Down
64407	2158	24	97	2.58e-14	7.98e-15	-2.23429	Down
921	3180	25	101	7.73e-15	2.42e-15	-2.23369	Down
9332	4190	1534	6188	0	0	-2.23151	Down
9945	3011	517	2084	1.58e-272	1.9e-272	-2.23046	Down
27098	1951	645	2597	0	0	-2.22881	Down
6900	7670	39	157	3.81e-22	1.34e-22	-2.22856	Down
4693	2058	1014	4082	0	0	-2.22856	Down
9722	5559	194	780	4.57e-103	3.08e-103	-2.22676	Down
81794	4237	4062	16315	0	0	-2.22527	Down
92691	3477	628	2522	0	0	-2.22507	Down
3606	1163	190	763	9.09e-101	6.07e-101	-2.22502	Down
100419868	1238	4	16	0.00206238	0.000465879	-2.21934	Down
26659	2138	2	8	0.0293565	0.00607475	-2.21934	Down
59351	2505	4	16	0.00206238	0.000465879	-2.21934	Down
120586	933	2	8	0.0293565	0.00607475	-2.21934	Down
29075	1574	22	88	4.98e-13	1.5e-13	-2.21934	Down
286023	1998	2	8	0.0293565	0.00607475	-2.21934	Down
339010	2132	2	8	0.0293565	0.00607475	-2.21934	Down
150677	566	17	68	2.13e-10	6.05e-11	-2.21934	Down
222967	3122	4	16	0.00206238	0.000465879	-2.21934	Down
80274	3885	10	40	1.11e-06	2.85e-07	-2.21934	Down
285045	1991	2	8	0.0293565	0.00607475	-2.21934	Down
51237	845	2	8	0.0293565	0.00607475	-2.21934	Down
392196	1440	3	12	0.00762338	0.00165834	-2.21934	Down
7479	1996	6	24	0.000160934	3.85e-05	-2.21934	Down
146325	2245	2	8	0.0293565	0.00607475	-2.21934	Down
23779	1725	2	8	0.0293565	0.00607475	-2.21934	Down
341032	1106	2	8	0.0293565	0.00607475	-2.21934	Down
339240	3153	2	8	0.0293565	0.00607475	-2.21934	Down
100506776	3516	10	40	1.11e-06	2.85e-07	-2.21934	Down
10633	1504	14	56	8.2e-09	2.25e-09	-2.21934	Down
165721	2475	2	8	0.0293565	0.00607475	-2.21934	Down
338662	945	2	8	0.0293565	0.00607475	-2.21934	Down
100132831	1980	2	8	0.0293565	0.00607475	-2.21934	Down
389762	4927	2	8	0.0293565	0.00607475	-2.21934	Down
84839	2190	4	16	0.00206238	0.000465879	-2.21934	Down
9313	1956	3	12	0.00762338	0.00165834	-2.21934	Down
100131532	2828	2	8	0.0293565	0.00607475	-2.21934	Down
100506655	2611	6	24	0.000160934	3.85e-05	-2.21934	Down
348093	2019	220	876	1.24e-114	8.81e-115	-2.21277	Down
340037	1600	49	195	7.03e-27	2.64e-27	-2.21196	Down
23767	4024	488	1942	1.57e-251	1.79e-251	-2.21193	Down
944	3797	41	163	1.02e-22	3.61e-23	-2.21051	Down
4772	4762	603	2392	0	0	-2.20733	Down
117248	4641	2549	10104	0	0	-2.20626	Down
7483	1240	54	214	3.04e-29	1.18e-29	-2.20592	Down
284521	1913	75	297	6.63e-40	2.89e-40	-2.20484	Down
80320	3805	42	166	5.26e-23	1.87e-23	-2.20206	Down
2261	4310	460	1818	2.61e-234	2.85e-234	-2.20198	Down
644554	1058	81	320	8.8e-43	3.96e-43	-2.20142	Down
6657	2520	6775	26752	0	0	-2.20069	Down
282679	2153	504	1987	2.18e-255	2.52e-255	-2.19843	Down
196410	1531	613	2416	0	0	-2.198	Down
54504	1779	814	3207	0	0	-2.19746	Down
79656	1342	377	1485	2.91e-191	2.79e-191	-2.19716	Down
100128164	6057	16	63	1.24e-09	3.46e-10	-2.19662	Down
1002	6528	1100	4331	0	0	-2.19653	Down
348751	966	63	248	1.89e-33	7.67e-34	-2.19625	Down
9603	3720	2062	8106	0	0	-2.19428	Down
5121	566	29	114	3.17e-16	1.01e-16	-2.19425	Down
100216479	2868	430	1684	1.33e-215	1.38e-215	-2.18882	Down
54753	3578	1053	4122	0	0	-2.18818	Down
8303	3307	11349	44315	0	0	-2.18457	Down
23604	2628	281	1097	8.33e-141	6.66e-141	-2.18426	Down
23532	2776	104	406	2.67e-53	1.32e-53	-2.18423	Down
147920	906	20	78	1.66e-11	4.84e-12	-2.18281	Down
64321	2350	10	39	1.92e-06	4.93e-07	-2.18281	Down
306	1634	3345	13043	0	0	-2.18254	Down
84553	9773	472	1840	1.68e-234	1.83e-234	-2.18219	Down
4857	3918	644	2504	0	0	-2.17844	Down
6370	1002	8	31	2.3e-05	5.67e-06	-2.17353	Down
6860	4111	32	124	2.51e-17	8.18e-18	-2.17353	Down
221938	2434	8	31	2.3e-05	5.67e-06	-2.17353	Down
2679	2036	8	31	2.3e-05	5.67e-06	-2.17353	Down
4306	5915	2883	11167	0	0	-2.17294	Down
56704	4373	142	550	4.18e-71	2.34e-71	-2.17288	Down
338811	4136	71	275	1.93e-36	8.08e-37	-2.17288	Down
5909	3495	370	1431	1.15e-181	1.07e-181	-2.17076	Down
79852	1810	45	174	1.23e-23	4.42e-24	-2.17043	Down
81832	6326	182	703	3.69e-90	2.32e-90	-2.16892	Down
64762	7051	2488	9610	0	0	-2.16889	Down
9743	10111	4733	18266	0	0	-2.16767	Down
10351	5736	2855	11017	0	0	-2.16751	Down
286256	694	21	81	8.47e-12	2.49e-12	-2.16687	Down
10205	2871	7	27	8.03e-05	1.94e-05	-2.16687	Down
728758	2366	27	104	1.03e-14	3.21e-15	-2.16489	Down
27092	3430	752	2896	0	0	-2.1646	Down
92973	5245	335	1290	2.21e-163	1.94e-163	-2.16448	Down
55365	1047	506	1948	1.32e-245	1.49e-245	-2.16412	Down
9844	5539	371	1425	6.91e-180	6.37e-180	-2.16081	Down
317762	5671	6619	25396	0	0	-2.15925	Down
128553	12204	200	767	1.28e-97	8.44e-98	-2.15856	Down
1421	724	6	23	0.000283061	6.68e-05	-2.15794	Down
7053	2679	6	23	0.000283061	6.68e-05	-2.15794	Down
285359	983	59	226	5.49e-30	2.15e-30	-2.15687	Down
421	4056	3630	13903	0	0	-2.15669	Down
326342	2732	35	134	1.99e-18	6.6e-19	-2.15614	Down
8927	15964	353	1350	6.44e-170	5.78e-170	-2.15456	Down
10268	1376	39	149	2.78e-20	9.51e-21	-2.1531	Down
3117	1542	743	2837	0	0	-2.15227	Down
283576	3408	27	103	1.76e-14	5.46e-15	-2.15095	Down
25759	2509	2042	7772	0	0	-2.14764	Down
340419	3149	41	156	4.3e-21	1.49e-21	-2.14719	Down
10811	1650	277	1053	2.55e-132	1.97e-132	-2.14589	Down
441061	1528	25	95	1.97e-13	5.98e-14	-2.14534	Down
56341	2417	5	19	0.00101087	0.000232095	-2.14534	Down
29760	1829	70	266	8.99e-35	3.7e-35	-2.14534	Down
79258	2902	30	114	8.1e-16	2.58e-16	-2.14534	Down
26238	1672	15	57	1.24e-08	3.39e-09	-2.14534	Down
115948	2176	138	523	1.62e-66	8.84e-67	-2.14148	Down
728978	652	19	72	1.64e-10	4.67e-11	-2.14134	Down
2153	9179	146	553	3.43e-70	1.91e-70	-2.14065	Down
8120	3746	202	765	2.3e-96	1.51e-96	-2.14044	Down
90768	4953	951	3600	0	0	-2.13982	Down
1183	6789	1207	4569	0	0	-2.13979	Down
83992	5980	1972	7452	0	0	-2.13731	Down
57119	1998	9	34	1.15e-05	2.87e-06	-2.13688	Down
6010	2768	13	49	1.43e-07	3.8e-08	-2.13361	Down
9103	2488	64	241	1.96e-31	7.82e-32	-2.13223	Down
93429	1635	17	64	1.86e-09	5.18e-10	-2.13188	Down
136332	2700	38	143	2.67e-19	8.97e-20	-2.13128	Down
10686	3290	83	312	3.92e-40	1.71e-40	-2.1297	Down
401145	6205	37	139	8.85e-19	2.95e-19	-2.12883	Down
55366	5248	27736	104186	0	0	-2.12867	Down
554202	2166	2200	8252	0	0	-2.12658	Down
6288	678	4	15	0.00367733	0.000817383	-2.12623	Down
390598	2607	28	105	1.53e-14	4.75e-15	-2.12623	Down
646658	2629	4	15	0.00367733	0.000817383	-2.12623	Down
797	1031	4	15	0.00367733	0.000817383	-2.12623	Down
89846	3470	36	135	2.94e-18	9.73e-19	-2.12623	Down
345062	987	4	15	0.00367733	0.000817383	-2.12623	Down
246	2707	4	15	0.00367733	0.000817383	-2.12623	Down
653645	1129	8	30	4e-05	9.77e-06	-2.12623	Down
112399	2722	1299	4868	0	0	-2.12527	Down
3784	3262	91	341	1.37e-43	6.2e-44	-2.12517	Down
400804	4492	83	311	6.62e-40	2.89e-40	-2.12507	Down
56138	6115	252	943	3.77e-117	2.72e-117	-2.12317	Down
202559	2336	89	332	2.51e-42	1.12e-42	-2.11864	Down
9543	4491	29	108	7.81e-15	2.44e-15	-2.11624	Down
138255	851	64	238	9.51e-31	3.75e-31	-2.11416	Down
64111	1190	30736	114283	0	0	-2.11395	Down
5957	1217	39	145	2.31e-19	7.78e-20	-2.11384	Down
317751	3242	81	301	2.05e-38	8.78e-39	-2.11311	Down
338442	2082	14	52	7.21e-08	1.93e-08	-2.11242	Down
642924	1924	14	52	7.21e-08	1.93e-08	-2.11242	Down
51738	1374	7	26	0.000139902	3.35e-05	-2.11242	Down
92737	3272	3616	13425	0	0	-2.11179	Down
374946	1773	125	464	3.31e-58	1.7e-58	-2.11153	Down
440435	7980	83	308	3.19e-39	1.38e-39	-2.11109	Down
11209	2642	223	827	3.38e-102	2.27e-102	-2.11018	Down
345651	2812	533	1974	7.38e-241	8.23e-241	-2.10825	Down
83876	5265	64	237	1.61e-30	6.32e-31	-2.10808	Down
1959	2992	2011	7441	0	0	-2.10692	Down
27147	3485	1664	6146	0	0	-2.10433	Down
23321	6792	8807	32517	0	0	-2.10381	Down
3213	3627	191	705	4.69e-87	2.9e-87	-2.10339	Down
80201	3719	6838	25227	0	0	-2.10266	Down
55220	3044	370	1365	1.23e-166	1.09e-166	-2.10264	Down
224	3823	11920	43961	0	0	-2.10218	Down
22843	6545	467	1722	1.38e-209	1.41e-209	-2.10193	Down
79962	1854	181	667	2.37e-82	1.43e-82	-2.10104	Down
1116	1867	9191	33857	0	0	-2.1005	Down
553103	1801	75	276	4.4e-35	1.82e-35	-2.09904	Down
116966	7529	881	3242	0	0	-2.09901	Down
8685	1853	392	1441	2.94e-175	2.68e-175	-2.09748	Down
10769	2850	52271	191967	0	0	-2.09611	Down
340120	3952	149	547	1.18e-67	6.5e-68	-2.09557	Down
23225	7191	1176	4314	0	0	-2.09448	Down
9734	4659	8645	31709	0	0	-2.09429	Down
221262	715	3	11	0.0137697	0.00293279	-2.09381	Down
3821	1617	3	11	0.0137697	0.00293279	-2.09381	Down
390323	939	3	11	0.0137697	0.00293279	-2.09381	Down
115727	3235	33	121	3.1e-16	9.91e-17	-2.09381	Down
121391	2799	3	11	0.0137697	0.00293279	-2.09381	Down
23783	1539	12	44	8.37e-07	2.17e-07	-2.09381	Down
7302	864	3	11	0.0137697	0.00293279	-2.09381	Down
151835	2066	15	55	3.63e-08	9.81e-09	-2.09381	Down
64241	2679	3	11	0.0137697	0.00293279	-2.09381	Down
646799	1103	3	11	0.0137697	0.00293279	-2.09381	Down
375323	4895	27	99	1.47e-13	4.49e-14	-2.09381	Down
1612	5942	3267	11969	0	0	-2.0926	Down
65055	3868	604	2212	4.96e-267	5.88e-267	-2.09207	Down
51760	1912	65	238	2.34e-30	9.18e-31	-2.09179	Down
1234	3686	118	432	1.09e-53	5.43e-54	-2.09158	Down
60468	9215	624	2281	7.58e-275	9.15e-275	-2.08939	Down
5627	3595	13791	50405	0	0	-2.08918	Down
54905	2354	55	201	7.44e-26	2.76e-26	-2.08903	Down
645367	2484	23	84	1.08e-11	3.17e-12	-2.08809	Down
8123	3373	401	1464	5.79e-177	5.29e-177	-2.08758	Down
283726	3146	94	343	7.15e-43	3.22e-43	-2.08681	Down
5008	1869	170	620	5.3e-76	3.07e-76	-2.08607	Down
94097	4140	2703	9851	0	0	-2.08505	Down
2894	5849	320	1166	4.07e-141	3.26e-141	-2.08476	Down
116984	7375	839	3043	0	0	-2.07809	Down
3352	2857	339	1229	5.62e-148	4.62e-148	-2.07747	Down
434	584	8	29	6.91e-05	1.67e-05	-2.07732	Down
440503	2445	8	29	6.91e-05	1.67e-05	-2.07732	Down
84107	4278	492	1783	1.11e-213	1.15e-213	-2.07691	Down
9435	4154	15023	54436	0	0	-2.07673	Down
388646	2454	21	76	1.22e-10	3.48e-11	-2.07495	Down
283987	3369	1102	3988	0	0	-2.07488	Down
118491	3714	342	1237	1.27e-148	1.05e-148	-2.07412	Down
23239	6411	5628	20345	0	0	-2.07332	Down
92235	4034	128	462	1.35e-56	6.86e-57	-2.07109	Down
56606	1885	547	1973	3.04e-235	3.33e-235	-2.07012	Down
112755	4544	426	1535	2.54e-183	2.37e-183	-2.06865	Down
29970	2647	830	2989	0	0	-2.06782	Down
4781	8507	11517	41463	0	0	-2.0674	Down
115827	1030	5	18	0.0017755	0.000402368	-2.06733	Down
353149	1883	5	18	0.0017755	0.000402368	-2.06733	Down
26002	3039	40211	144715	0	0	-2.06689	Down
2903	14706	663	2385	3.04e-283	3.74e-283	-2.06625	Down
284427	1571	42	151	1.47e-19	4.96e-20	-2.06543	Down
5125	9538	2669	9578	0	0	-2.06276	Down
148345	2779	17	61	9.19e-09	2.52e-09	-2.06261	Down
117177	9636	5385	19315	0	0	-2.06204	Down
3123	1280	3336	11961	0	0	-2.06148	Down
57549	4048	24	86	9.27e-12	2.72e-12	-2.06064	Down
219699	6907	7487	26792	0	0	-2.05868	Down
729085	3449	329	1177	3.79e-140	3.02e-140	-2.05829	Down
51305	1303	7	25	0.000242391	5.75e-05	-2.05584	Down
58498	619	21	75	2.06e-10	5.86e-11	-2.05584	Down
64091	1667	326	1164	2.21e-138	1.75e-138	-2.05549	Down
9182	1796	1314	4686	0	0	-2.05373	Down
51599	2292	756	2695	0	0	-2.05317	Down
2792	628	16	57	3.1e-08	8.4e-09	-2.05223	Down
8784	1214	41	146	8.18e-19	2.73e-19	-2.05161	Down
653361	1409	66	235	2.68e-29	1.04e-29	-2.05146	Down
7976	13804	1402	4988	0	0	-2.05031	Down
260429	1694	9	32	3.41e-05	8.37e-06	-2.04941	Down
84952	7353	16156	57409	0	0	-2.04854	Down
8741	2293	657	2334	3.84e-274	4.63e-274	-2.04818	Down
51233	1336	20	71	6.91e-10	1.94e-10	-2.04716	Down
84530	8494	22	78	1.04e-10	2.98e-11	-2.04531	Down
401027	2259	237	840	9.37e-100	6.22e-100	-2.04484	Down
3635	4928	376	1332	5.95e-157	5.07e-157	-2.04413	Down
283383	5392	513	1817	2.59e-213	2.68e-213	-2.04387	Down
144423	2721	308	1090	1.1e-128	8.35e-129	-2.04266	Down
3739	4179	260	920	6.57e-109	4.55e-109	-2.04246	Down
26153	6757	41	145	1.37e-18	4.57e-19	-2.0417	Down
388939	7062	28	99	3.59e-13	1.08e-13	-2.04134	Down
9625	5327	580	2050	6.12e-240	6.8e-240	-2.04084	Down
478	3674	247	873	2.44e-103	1.65e-103	-2.04081	Down
4118	1153	118	417	2.53e-50	1.22e-50	-2.0406	Down
401207	5680	497	1756	9.18e-206	9.25e-206	-2.04031	Down
8876	3844	66	233	7.52e-29	2.89e-29	-2.03913	Down
439949	2253	83	293	7.62e-36	3.18e-36	-2.03906	Down
100132341	1789	187	659	2.86e-78	1.68e-78	-2.03658	Down
4908	1349	993	3496	0	0	-2.03518	Down
4128	5438	2531	8892	0	0	-2.03214	Down
5764	1558	29001	101878	0	0	-2.03201	Down
3084	3220	4712	16525	0	0	-2.02958	Down
100509894	3508	77	270	5.7e-33	2.31e-33	-2.02937	Down
200879	2478	415	1454	1.96e-169	1.75e-169	-2.02818	Down
285525	937	4	14	0.00650309	0.0014226	-2.02669	Down
5148	1064	52	182	1e-22	3.56e-23	-2.02669	Down
148281	4375	20	70	1.17e-09	3.26e-10	-2.02669	Down
80094	1839	4	14	0.00650309	0.0014226	-2.02669	Down
283420	1673	4	14	0.00650309	0.0014226	-2.02669	Down
100505835	1948	4	14	0.00650309	0.0014226	-2.02669	Down
285555	1654	14	49	3.56e-07	9.32e-08	-2.02669	Down
8618	5482	634	2219	3.09e-257	3.58e-257	-2.02669	Down
347730	2217	8	28	0.000118862	2.85e-05	-2.02669	Down
140469	6352	22	77	1.75e-10	4.99e-11	-2.02669	Down
57475	6540	893	3121	0	0	-2.02461	Down
2752	4737	46710	162999	0	0	-2.0224	Down
25825	2993	8484	29576	0	0	-2.02095	Down
134829	2010	193	672	6.47e-79	3.82e-79	-2.0192	Down
154092	1717	25	87	1.33e-11	3.88e-12	-2.01843	Down
3696	8787	10752	37404	0	0	-2.01793	Down
283481	1144	115	400	1.14e-47	5.38e-48	-2.0177	Down
8786	2384	690	2400	1.87e-276	2.27e-276	-2.0177	Down
201798	2472	120	417	1.41e-49	6.76e-50	-2.01635	Down
79603	1817	2551	8863	0	0	-2.01607	Down
25924	4884	455	1580	1.92e-182	1.79e-182	-2.01532	Down
158228	1741	94	326	4.52e-39	1.95e-39	-2.01348	Down
2322	3848	15	52	1.78e-07	4.7e-08	-2.01289	Down
4760	3002	15	52	1.78e-07	4.7e-08	-2.01289	Down
1770	13750	75	260	1.71e-31	6.8e-32	-2.01289	Down
27439	5043	132	457	5.59e-54	2.78e-54	-2.01099	Down
10266	808	98	339	1.82e-40	7.97e-41	-2.00977	Down
130940	2846	451	1560	1.64e-179	1.52e-179	-2.00968	Down
1620	3196	1387	4792	0	0	-2.008	Down
7754	4029	579	2000	2.93e-229	3.17e-229	-2.0077	Down
132228	1526	20	69	1.96e-09	5.46e-10	-2.00593	Down
170575	4430	29	100	5.1e-13	1.54e-13	-2.00521	Down
100287482	1068	54	186	7.19e-23	2.55e-23	-2.00361	Down
51733	2167	36	124	9.09e-16	2.89e-16	-2.00361	Down
4053	8568	107208	369207	0	0	-2.00336	Down
4916	4141	999	3440	0	0	-2.00319	Down
9481	2986	677	2331	4.74e-266	5.6e-266	-2.00306	Down
23166	7965	1644	5660	0	0	-2.00293	Down
342035	5084	212	728	2.93e-84	1.79e-84	-1.99921	Down
26507	5988	231	793	1.38e-91	8.76e-92	-1.99877	Down
54777	8293	158	542	3.79e-63	2.02e-63	-1.99771	Down
203562	732	7	24	0.0004174	9.77e-05	-1.99695	Down
113457	1646	14	48	6.02e-07	1.57e-07	-1.99695	Down
1901	3050	3708	12711	0	0	-1.9967	Down
225	5341	130	445	4.54e-52	2.22e-52	-1.99463	Down
10537	1006	286	978	4.28e-112	3.01e-112	-1.99316	Down
27197	3349	62	212	1.13e-25	4.17e-26	-1.99306	Down
1501	5440	970	3314	0	0	-1.99186	Down
124540	2151	4106	14010	0	0	-1.98999	Down
56963	3227	332	1132	4.4e-129	3.35e-129	-1.98896	Down
10082	7114	12320	41989	0	0	-1.98835	Down
11346	5397	42559	145018	0	0	-1.98803	Down
2213	2174	438	1492	2.44e-169	2.18e-169	-1.98758	Down
57451	9645	5449	18553	0	0	-1.98693	Down
79870	2859	1260	4286	0	0	-1.98555	Down
10369	4523	10	34	2.87e-05	7.06e-06	-1.98487	Down
2099	6466	115	391	1.1e-45	5.1e-46	-1.98487	Down
643387	2660	5	17	0.00309461	0.00069205	-1.98487	Down
27285	1536	25	85	3.72e-11	1.08e-11	-1.98487	Down
5746	2734	5	17	0.00309461	0.00069205	-1.98487	Down
100505875	1011	5	17	0.00309461	0.00069205	-1.98487	Down
374877	1709	10	34	2.87e-05	7.06e-06	-1.98487	Down
51085	3288	89	302	1.29e-35	5.38e-36	-1.98201	Down
117584	4197	870	2951	0	0	-1.98145	Down
477	5496	2243	7608	0	0	-1.98143	Down
64221	4554	1687	5722	0	0	-1.9814	Down
29944	3771	64	217	4.82e-26	1.79e-26	-1.98089	Down
94030	2958	684	2317	1.95e-260	2.28e-260	-1.97953	Down
5239	3341	5235	17716	0	0	-1.97813	Down
3486	2638	196978	666424	0	0	-1.97774	Down
1140	2437	4415	14916	0	0	-1.97571	Down
152940	817	8	27	0.000203282	4.83e-05	-1.97423	Down
7097	3417	360	1215	4.48e-137	3.53e-137	-1.97423	Down
100130417	496	16	54	1.49e-07	3.96e-08	-1.97423	Down
221391	3513	8	27	0.000203282	4.83e-05	-1.97423	Down
114821	4895	446	1505	2.78e-169	2.48e-169	-1.97399	Down
392617	3751	118	398	3.96e-46	1.84e-46	-1.97332	Down
2649	1918	51	172	7.05e-21	2.43e-21	-1.97318	Down
9498	11794	963	3247	0	0	-1.97284	Down
90161	4576	287	967	2.51e-109	1.74e-109	-1.9718	Down
60680	5008	103	347	2.13e-40	9.33e-41	-1.97163	Down
80144	15643	1398	4704	0	0	-1.96986	Down
8532	2555	2014	6775	0	0	-1.9695	Down
256710	975	11	37	1.41e-05	3.52e-06	-1.96936	Down
4923	4158	25	84	6.22e-11	1.79e-11	-1.9678	Down
646405	6477	67	225	1.04e-26	3.89e-27	-1.96703	Down
3738	3346	42	141	2.5e-17	8.16e-18	-1.96657	Down
55655	3590	734	2463	3.16e-274	3.81e-274	-1.9659	Down
943	3686	17	57	7.42e-08	1.99e-08	-1.96477	Down
1816	2398	20	67	5.51e-09	1.52e-09	-1.9635	Down
51284	4992	183	613	1.29e-69	7.14e-70	-1.96338	Down
140290	2730	83	278	1.57e-32	6.32e-33	-1.96324	Down
5343	3011	26	87	3.12e-11	9.05e-12	-1.96184	Down
64359	3024	10459	34997	0	0	-1.96182	Down
3111	3485	403	1347	2.37e-150	1.97e-150	-1.96024	Down
653653	1160	170	568	1.74e-64	9.32e-65	-1.95969	Down
2560	2226	115	384	3.74e-44	1.71e-44	-1.95881	Down
26166	4184	68	227	8.69e-27	3.26e-27	-1.95842	Down
26960	11140	5602	18698	0	0	-1.95821	Down
5602	4213	801	2672	1.26e-295	1.59e-295	-1.95738	Down
57139	2571	795	2651	3.25e-293	4.08e-293	-1.95685	Down
84618	1107	3	10	0.0246232	0.00513812	-1.9563	Down
440905	4525	3	10	0.0246232	0.00513812	-1.9563	Down
1791	2071	3	10	0.0246232	0.00513812	-1.9563	Down
339529	1809	3	10	0.0246232	0.00513812	-1.9563	Down
3596	1282	3	10	0.0246232	0.00513812	-1.9563	Down
4222	2330	3	10	0.0246232	0.00513812	-1.9563	Down
9622	1347	12	40	6.97e-06	1.75e-06	-1.9563	Down
2837	1170	3	10	0.0246232	0.00513812	-1.9563	Down
340113	2018	3	10	0.0246232	0.00513812	-1.9563	Down
8343	430	6	20	0.00148239	0.000337262	-1.9563	Down
404037	3461	87	290	1.03e-33	4.2e-34	-1.9563	Down
51083	778	102	340	3.14e-39	1.36e-39	-1.9563	Down
259289	1027	3	10	0.0246232	0.00513812	-1.9563	Down
643664	1195	6	20	0.00148239	0.000337262	-1.9563	Down
1942	1590	869	2896	0	0	-1.95597	Down
192668	2719	982	3271	0	0	-1.95527	Down
2558	2910	126	419	7.86e-48	3.7e-48	-1.95286	Down
7088	3283	4486	14903	0	0	-1.95144	Down
203100	2130	82	272	1.4e-31	5.57e-32	-1.94925	Down
3001	913	38	126	1.77e-15	5.59e-16	-1.94869	Down
5031	2649	431	1429	3.82e-158	3.27e-158	-1.94858	Down
3663	2900	254	842	5.61e-94	3.61e-94	-1.94833	Down
389705	932	45	149	5.32e-18	1.76e-18	-1.94665	Down
140738	1687	527	1744	3.37e-192	3.24e-192	-1.94586	Down
1952	10540	10876	35964	0	0	-1.94474	Down
120224	2207	36	119	1.16e-14	3.6e-15	-1.94423	Down
79993	3902	743	2456	1.67e-269	1.99e-269	-1.94421	Down
56137	5360	318	1051	1.75e-116	1.26e-116	-1.944	Down
80022	9424	470	1550	1.79e-170	1.6e-170	-1.94087	Down
164045	4936	118	389	3.61e-44	1.65e-44	-1.94032	Down
57593	2931	586	1931	1.06e-211	1.09e-211	-1.93971	Down
163223	2934	34	112	7.59e-14	2.32e-14	-1.93923	Down
79006	1109	6784	22338	0	0	-1.93863	Down
50861	2441	2495	8208	0	0	-1.93733	Down
335	897	38	125	2.93e-15	9.23e-16	-1.93719	Down
1993	3814	86	282	2.49e-32	1e-32	-1.93262	Down
118738	3513	200	655	1.13e-72	6.4e-73	-1.93083	Down
729723	4695	91	298	5.01e-34	2.05e-34	-1.93071	Down
6614	6736	346	1133	2.72e-124	2.03e-124	-1.93064	Down
284124	3798	15	49	8.43e-07	2.18e-07	-1.92716	Down
442213	3268	1690	5518	0	0	-1.92646	Down
120425	2195	38	124	4.85e-15	1.52e-15	-1.92561	Down
80704	3775	99	323	1.31e-36	5.51e-37	-1.92537	Down
220136	1837	183	597	3.74e-66	2.03e-66	-1.92523	Down
4990	1500	1092	3559	0	0	-1.92384	Down
9076	3452	17371	56535	0	0	-1.9218	Down
27445	20288	613	1994	9.01e-216	9.4e-216	-1.92104	Down
55576	8266	36	117	3.17e-14	9.77e-15	-1.91978	Down
284656	5526	56	182	2.86e-21	9.93e-22	-1.91978	Down
5275	3197	4	13	0.0113933	0.00244381	-1.91978	Down
221188	3848	4	13	0.0113933	0.00244381	-1.91978	Down
400512	631	8	26	0.000345539	8.12e-05	-1.91978	Down
660	2592	8	26	0.000345539	8.12e-05	-1.91978	Down
494558	967	4	13	0.0113933	0.00244381	-1.91978	Down
444882	573	8	26	0.000345539	8.12e-05	-1.91978	Down
8483	4484	69	224	8.84e-26	3.27e-26	-1.91817	Down
10653	1817	9962	32304	0	0	-1.91654	Down
79992	1869	59	191	3.66e-22	1.29e-22	-1.91412	Down
8645	3800	17	55	2.07e-07	5.46e-08	-1.91323	Down
150771	2168	167	540	1.7e-59	8.77e-60	-1.91245	Down
216	2378	786	2541	1.08e-272	1.29e-272	-1.91213	Down
3985	3848	23060	74400	0	0	-1.90925	Down
6588	738	485	1564	3.13e-168	2.79e-168	-1.90852	Down
220108	4916	279	899	1.81e-97	1.19e-97	-1.90739	Down
1948	4404	10570	33988	0	0	-1.90439	Down
266727	8907	8089	25995	0	0	-1.90354	Down
100507250	1737	33	106	6.82e-13	2.05e-13	-1.90286	Down
7006	3620	520	1670	9.34e-179	8.6e-179	-1.9026	Down
83850	4449	104	334	3.15e-37	1.33e-37	-1.9026	Down
100233209	2502	38	122	1.32e-14	4.1e-15	-1.90215	Down
9075	3163	139	446	4.41e-49	2.1e-49	-1.9013	Down
728215	3859	1613	5173	0	0	-1.90059	Down
130733	1703	425	1362	7.49e-146	6.11e-146	-1.89953	Down
1050	2591	593	1900	1.3e-202	1.3e-202	-1.89923	Down
116255	1096	5	16	0.00534793	0.00117708	-1.89741	Down
50832	900	20	64	2.54e-08	6.88e-09	-1.89741	Down
60484	1795	5	16	0.00534793	0.00117708	-1.89741	Down
283553	676	5	16	0.00534793	0.00117708	-1.89741	Down
100507346	1957	15	48	1.41e-06	3.61e-07	-1.89741	Down
140870	619	5	16	0.00534793	0.00117708	-1.89741	Down
387082	702	5	16	0.00534793	0.00117708	-1.89741	Down
220963	4001	1233	3943	0	0	-1.89646	Down
3976	3987	49375	157848	0	0	-1.89602	Down
54103	3265	1745	5576	0	0	-1.89534	Down
167838	4685	98	313	8.29e-35	3.41e-35	-1.89465	Down
79661	2019	418	1335	1.65e-142	1.32e-142	-1.8946	Down
2561	7409	16	51	6.95e-07	1.8e-07	-1.89176	Down
10715	2558	424	1351	7.46e-144	6.03e-144	-1.89123	Down
441204	1648	27	86	1.18e-10	3.38e-11	-1.89072	Down
441172	1022	246	783	4.19e-84	2.55e-84	-1.88969	Down
729330	1782	11	35	4e-05	9.78e-06	-1.88919	Down
57144	4777	22	70	6.29e-09	1.73e-09	-1.88919	Down
8843	2152	22	70	6.29e-09	1.73e-09	-1.88919	Down
2785	962	22	70	6.29e-09	1.73e-09	-1.88919	Down
55304	3855	3311	10525	0	0	-1.88782	Down
129852	1921	28	89	5.89e-11	1.7e-11	-1.88772	Down
27299	2438	282	896	8.54e-96	5.56e-96	-1.88714	Down
83697	3422	17	54	3.44e-07	9.01e-08	-1.88676	Down
22899	4220	17	54	3.44e-07	9.01e-08	-1.88676	Down
317761	2779	594	1884	7.24e-199	7.12e-199	-1.8846	Down
83999	6152	2294	7274	0	0	-1.88422	Down
340267	3515	47	149	2.7e-17	8.78e-18	-1.88392	Down
51655	1814	1007	3190	0	0	-1.88283	Down
3750	4720	980	3104	0	0	-1.88261	Down
3207	2653	6	19	0.00253669	0.000569829	-1.8823	Down
54212	1889	6	19	0.00253669	0.000569829	-1.8823	Down
3242	1916	42	133	1.38e-15	4.36e-16	-1.8823	Down
353324	2430	12	38	1.96e-05	4.85e-06	-1.8823	Down
140947	3144	6	19	0.00253669	0.000569829	-1.8823	Down
1258	5663	12	38	1.96e-05	4.85e-06	-1.8823	Down
57713	8024	810	2564	2.48e-269	2.94e-269	-1.88174	Down
29958	3104	311	984	1.44e-104	9.78e-105	-1.88108	Down
6712	7884	787	2488	4.54e-261	5.31e-261	-1.87989	Down
4133	9445	23657	74725	0	0	-1.87866	Down
54972	3520	16624	52508	0	0	-1.87861	Down
280	2215	518	1636	3.25e-172	2.94e-172	-1.87849	Down
113146	18317	17360	54812	0	0	-1.87806	Down
196500	2739	1819	5743	0	0	-1.878	Down
253650	3756	115	363	1.24e-39	5.41e-40	-1.87767	Down
18	5586	5945	18751	0	0	-1.87656	Down
389799	1789	13	41	9.62e-06	2.41e-06	-1.87645	Down
117178	6025	17875	56360	0	0	-1.87607	Down
2086	3288	1603	5050	0	0	-1.87485	Down
4340	2170	27	85	1.94e-10	5.53e-11	-1.87384	Down
196264	983	116	365	1.02e-39	4.46e-40	-1.87311	Down
25861	4079	1462	4598	0	0	-1.8724	Down
4661	5550	14	44	4.74e-06	1.2e-06	-1.87141	Down
43847	1133	7	22	0.00121284	0.00027735	-1.87141	Down
54094	1296	14	44	4.74e-06	1.2e-06	-1.87141	Down
646982	3972	7	22	0.00121284	0.00027735	-1.87141	Down
160335	4855	2341	7356	0	0	-1.87113	Down
55966	2923	262	823	3.93e-87	2.43e-87	-1.87066	Down
54825	4313	36	113	2.32e-13	7.05e-14	-1.86959	Down
4938	1673	956	2999	0	0	-1.86874	Down
114043	1045	22	69	1.04e-08	2.84e-09	-1.86843	Down
9781	5740	1035	3245	0	0	-1.86793	Down
57224	7491	1779	5574	0	0	-1.86698	Down
6094	1894	1014	3175	0	0	-1.86604	Down
56924	3950	77	241	1.17e-26	4.4e-27	-1.86544	Down
10566	3027	172	538	2.35e-57	1.2e-57	-1.86454	Down
343637	2725	425	1329	7.45e-139	5.91e-139	-1.86414	Down
8612	1394	1261	3941	0	0	-1.86333	Down
9421	1749	8	25	0.000583513	0.00013552	-1.86319	Down
30819	2608	345	1078	6.48e-113	4.58e-113	-1.86303	Down
653712	1104	65	203	1.16e-22	4.11e-23	-1.86231	Down
2260	5963	34986	109252	0	0	-1.86215	Down
83660	11650	5635	17577	0	0	-1.86054	Down
94032	1360	340	1059	1.35e-110	9.44e-111	-1.85843	Down
2066	11941	1380	4297	0	0	-1.858	Down
100131814	1666	36	112	3.81e-13	1.15e-13	-1.85677	Down
56136	5260	45	140	4.68e-16	1.49e-16	-1.85677	Down
26085	1258	9	28	0.000282153	6.66e-05	-1.85677	Down
10815	2200	91	283	8.13e-31	3.21e-31	-1.8562	Down
144501	3894	4788	14871	0	0	-1.85434	Down
123041	9773	48	149	5.93e-17	1.92e-17	-1.85354	Down
4915	8340	17093	53023	0	0	-1.85255	Down
5629	8505	1584	4912	0	0	-1.85208	Down
6279	532	70	217	6.14e-24	2.22e-24	-1.85161	Down
150590	1430	62	192	2.41e-21	8.4e-22	-1.8501	Down
1636	4969	394	1219	4e-126	3e-126	-1.84877	Down
79946	1469	11	34	6.68e-05	1.62e-05	-1.84737	Down
15	1935	22	68	1.71e-08	4.65e-09	-1.84737	Down
113791	2478	7657	23659	0	0	-1.84688	Down
23428	4257	6515	20120	0	0	-1.84613	Down
6696	1823	105507	325809	0	0	-1.84603	Down
64714	1726	23	71	8.49e-09	2.33e-09	-1.84552	Down
400927	494	117	361	1.56e-38	6.7e-39	-1.84483	Down
9020	4476	2503	7719	0	0	-1.84409	Down
8029	11933	869	2679	1.11e-273	1.34e-273	-1.8436	Down
1152	1475	18196	56070	0	0	-1.84295	Down
79961	3296	411	1266	2.63e-130	2.01e-130	-1.84241	Down
1739	5034	69564	213817	0	0	-1.8393	Down
6331	8504	8519	26172	0	0	-1.83861	Down
23762	4349	1429	4387	0	0	-1.83757	Down
66002	1783	29	89	1.3e-10	3.72e-11	-1.83709	Down
9914	3403	29	89	1.3e-10	3.72e-11	-1.83709	Down
9633	3625	198	607	3.72e-63	1.98e-63	-1.83553	Down
219539	1731	167	511	2.38e-53	1.18e-53	-1.83281	Down
387640	6613	306	936	3.83e-96	2.5e-96	-1.83231	Down
5364	7325	10958	33507	0	0	-1.83182	Down
374286	2780	35	107	2.03e-12	6.04e-13	-1.83152	Down
78998	2030	95	290	5.96e-31	2.36e-31	-1.82939	Down
283299	2503	77	235	2.17e-25	8e-26	-1.82907	Down
55713	3957	1389	4239	0	0	-1.82902	Down
26287	1462	78	238	1.1e-25	4.05e-26	-1.82875	Down
158866	6057	924	2819	1.08e-284	1.33e-284	-1.82856	Down
6518	2454	435	1326	6.85e-135	5.36e-135	-1.82733	Down
53832	3682	271	826	9.43e-85	5.76e-85	-1.82719	Down
6665	1394	151	460	5.54e-48	2.61e-48	-1.82642	Down
119	4119	283	862	2.67e-88	1.66e-88	-1.82622	Down
647946	2147	98	298	1.24e-31	4.95e-32	-1.8238	Down
23017	4744	779	2366	3.82e-238	4.22e-238	-1.82209	Down
29091	1970	739	2243	1.04e-225	1.11e-225	-1.82112	Down
54067	1215	63	191	8.47e-21	2.92e-21	-1.81949	Down
8313	4241	1533	4644	0	0	-1.81835	Down
1515	4542	522	1581	2.42e-159	2.08e-159	-1.81805	Down
3752	2693	511	1547	6.92e-156	5.87e-156	-1.81742	Down
414236	2516	198	599	1.74e-61	9.13e-62	-1.81639	Down
333926	1762	498	1505	2.01e-151	1.68e-151	-1.81488	Down
563	1278	48	145	4.16e-16	1.33e-16	-1.81428	Down
91543	3512	433	1308	8.35e-132	6.42e-132	-1.81426	Down
6503	3506	323	975	1.13e-98	7.51e-99	-1.81321	Down
84217	1782	162	489	2.08e-50	9.99e-51	-1.81318	Down
115749	2069	121	365	4.81e-38	2.05e-38	-1.81223	Down
4603	5188	6779	20443	0	0	-1.8118	Down
51430	5669	41892	126313	0	0	-1.81159	Down
100126784	3753	662	1996	1.18e-199	1.16e-199	-1.81155	Down
8353	462	92	277	3.18e-29	1.23e-29	-1.80952	Down
10936	2159	287	864	2.1e-87	1.3e-87	-1.80932	Down
100507524	2598	489	1471	2.58e-147	2.12e-147	-1.80823	Down
5625	2423	263	791	4.24e-80	2.52e-80	-1.80795	Down
9254	5358	158	475	8.28e-49	3.93e-49	-1.80734	Down
9750	5471	2341	7036	0	0	-1.80697	Down
23286	6753	3988	11972	0	0	-1.80526	Down
80206	4942	3717	11152	0	0	-1.80443	Down
23574	493	4	12	0.0197493	0.00415124	-1.8043	Down
51744	2543	10	30	0.000228026	5.41e-05	-1.8043	Down
125981	1088	3	9	0.043511	0.00884364	-1.8043	Down
197	1594	9	27	0.000471203	0.000109923	-1.8043	Down
59082	670	3	9	0.043511	0.00884364	-1.8043	Down
266697	2167	6	18	0.00430404	0.000952903	-1.8043	Down
479	3750	10	30	0.000228026	5.41e-05	-1.8043	Down
644591	738	4	12	0.0197493	0.00415124	-1.8043	Down
2527	1988	6	18	0.00430404	0.000952903	-1.8043	Down
9119	2125	5	15	0.0091547	0.00197687	-1.8043	Down
353135	1210	3	9	0.043511	0.00884364	-1.8043	Down
170393	738	4	12	0.0197493	0.00415124	-1.8043	Down
348645	2533	3	9	0.043511	0.00884364	-1.8043	Down
[truncated: 5,589 more rows]
